# Supplementary material for: Proteome efficiency of metabolic pathways in Escherichia coli increases along the nutrient flow
Source: PubMed Central journal article supplement (PMC10654084; doi:10.1128/msystems.00760-23), 2023-10-05
Supplement: msystems.00760-23-s0001.pdf [file msystems.00760-23-s0001.pdf]

Supplementary Figures and Tables for:

Proteome efficiency of metabolic pathways  
in *Escherichia coli* increases along the nutrient flow

Xiao-Pan Hu, Stefan Schroeder, Martin J. Lercher

This PDF includes Figure S1-S11 and Table S1-S6.

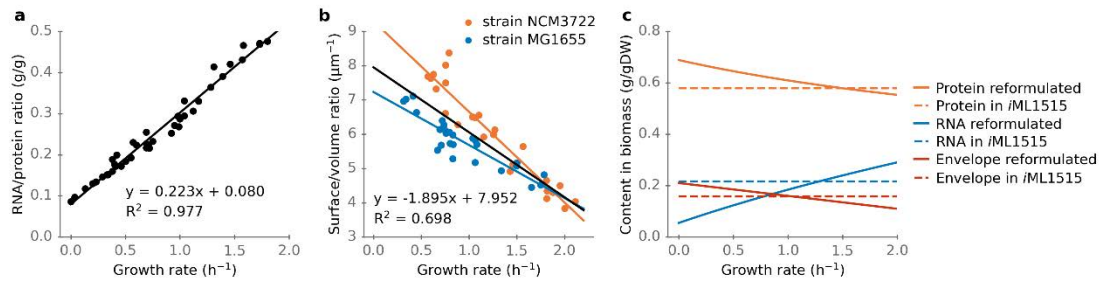

**Fig. S1. Growth rate-dependent biomass composition.** (a) Growth rate-dependent RNA/protein mass ratio; data from Ref.(1, 2). (b) Growth rate-dependent surface/volume ratio; data for wildtype strains in non-stressed growth conditions from Ref.(3). Surface/volume ratios are slightly different between the NCM3722 and MG1655 strains. Since the proteome data used in this study pertains to a third *E. coli* strain, BW25113, we used a regression model based on data from both strains (black line) to estimate the required production of cell envelope components. It should be noted that the re-estimated biomass composition here is not specific to any particular *E. coli* strain. (c) Growth rate-dependent biomass composition, reformulated considering the growth rate-dependent RNA/protein ratio in panel (a) and the surface/volume ratio in panel (b). The category “Envelope” includes murein, lipopolysaccharides, and lipids.

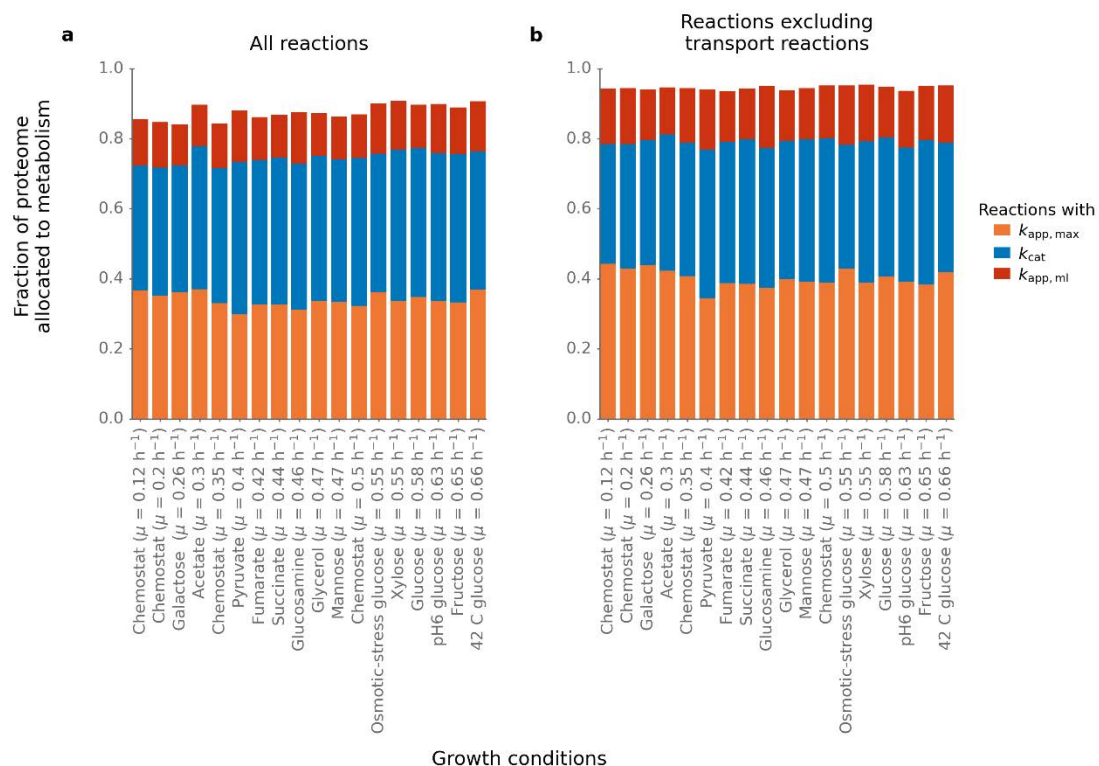

**Fig. S2. Reactions with available enzyme turnover numbers cover more than 70% of the proteome fraction allocated to metabolism.** Colors show the proteome fractions of enzymes with *in vivo* enzyme turnover number ( $k_{app,max}$ , in orange) or *in vitro* turnover number ( $k_{cat}$ , in blue). (a) All reactions in iML1515. (b) All non-transport reactions in iML1515.

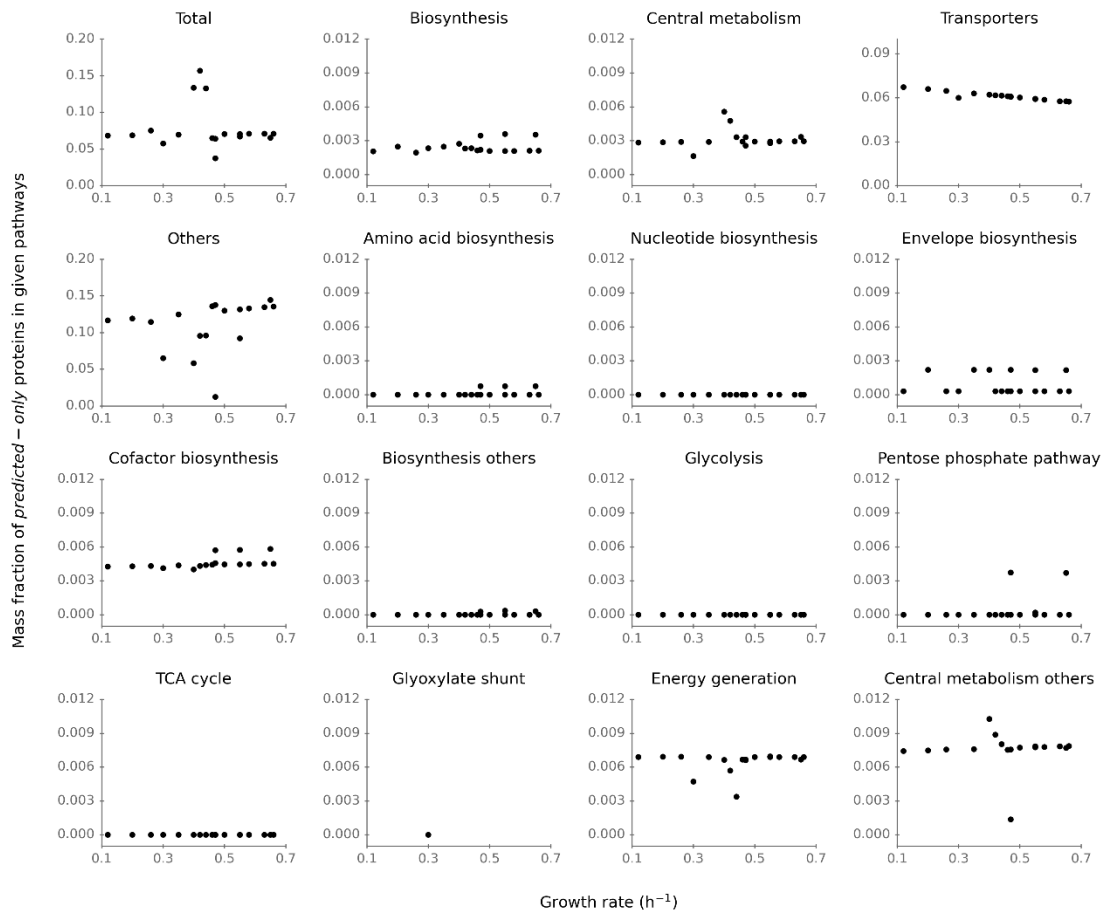

**Fig. S3. The mass fraction of predicted-only proteins across pathways is generally low.** Except for transporters and for proteins that cannot be assigned to particular pathways (others), the *predicted-only* proteins account for less than 1% of the predicted proteins in each pathway. We also note that the predictions of “others” and “transporters” are much lower than the measured data, and thus a relatively large fractions of predicted-only proteins in these two pathways does not change our conclusions.

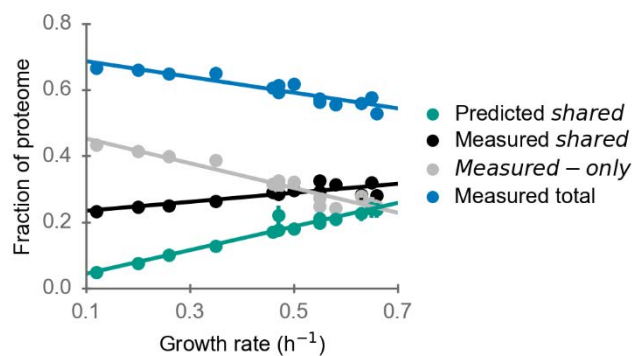

**Fig. S4. Proteome efficiency of the whole metabolic network.** With increasing growth rate, predicted and experimentally observed *shared* metabolic proteome fractions increase, while the *measured-only* metabolic proteome fraction decreases. Error bars extend from the 5th percentile to 95th percentile of 100 simulations, each with randomly perturbed turnover numbers.

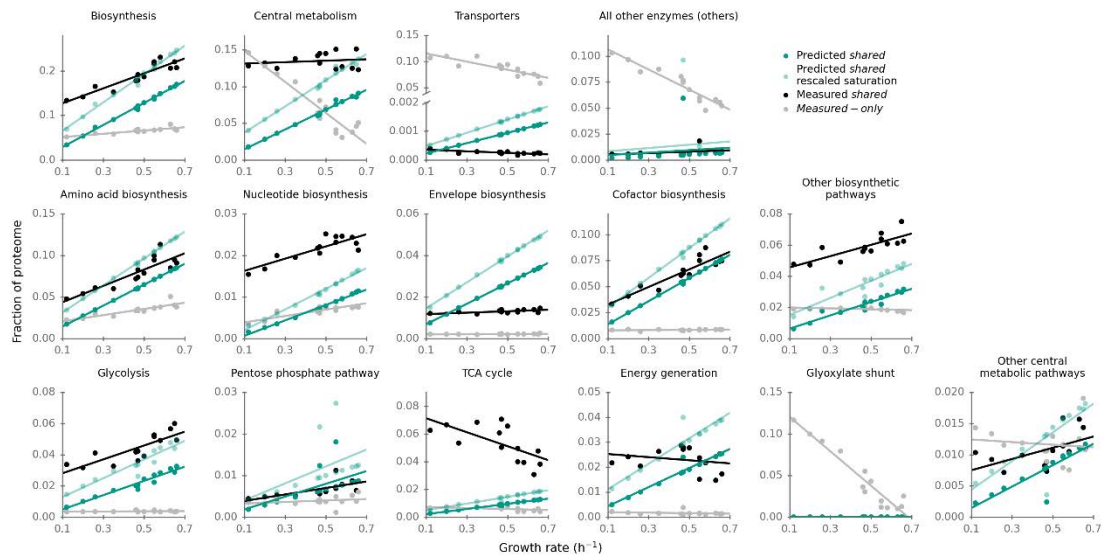

**Fig. S5. Predictions of proteome allocated to pathways, including calculations based on growth rate-dependent expected enzyme saturation levels.**

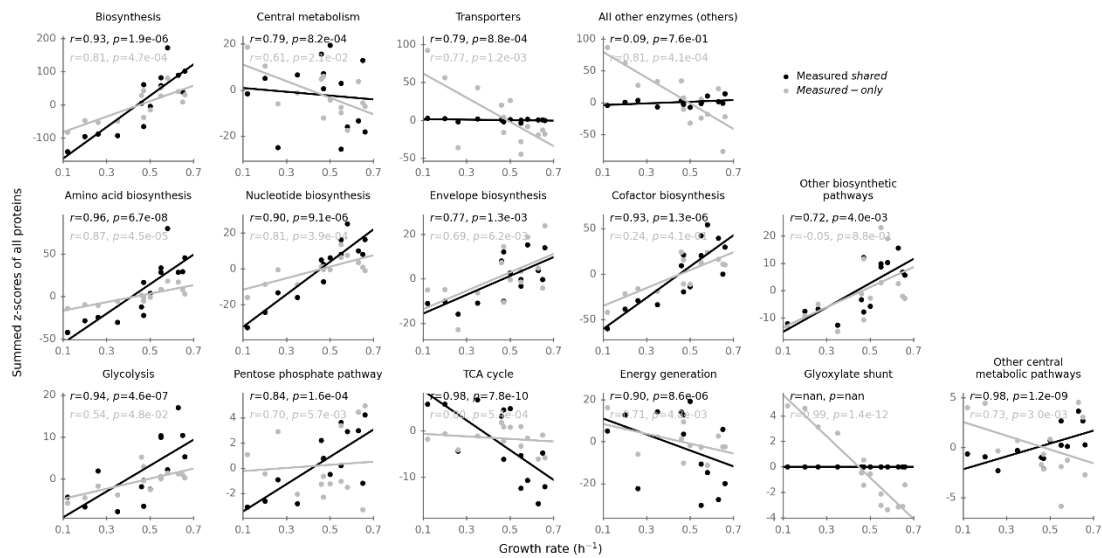

**Fig. S6. Normalized proteome allocation trends of pathways based on z-scores. Pearson's  $r$  represents the correlation between the normalized proteome allocation and the total proteome fraction. The normalized proteome allocation of *shared* proteins is correlated with the total proteome fraction for all pathways; the only exception is "others", where most of the proteins are *measured-only* proteins.**

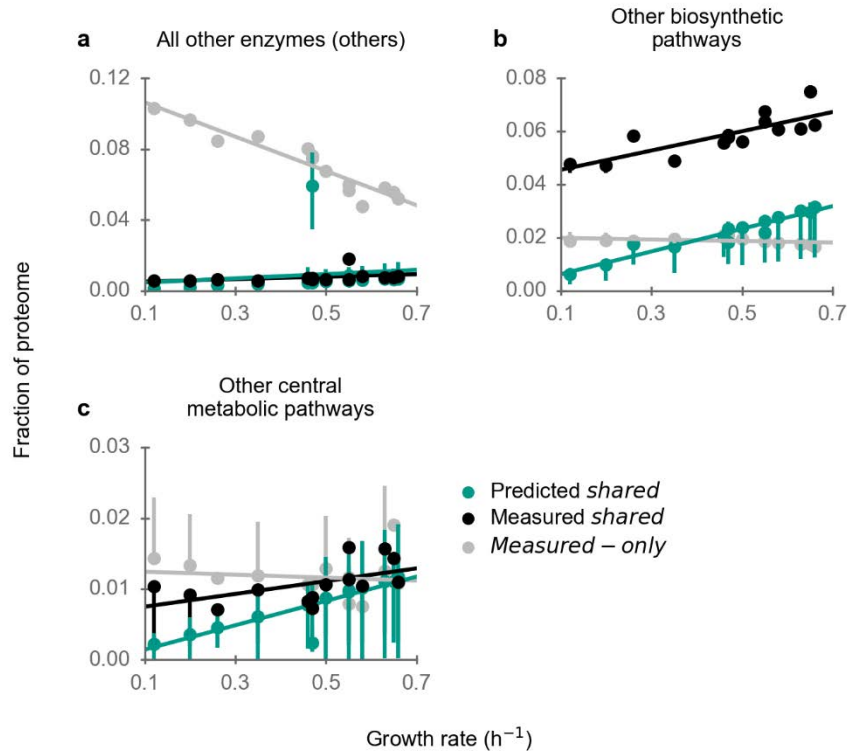

**Fig. S7. The proteome efficiency of other pathways.** (a) Combined proteome fraction of all enzymes in the *iML1515* model that are not part of the three pathway sets in Fig. 1b-1d (“others”). While the abundance of those proteins predicted to be active under optimality is similar to the expected abundance ( $GMFE_{\text{pathway}} = 1.79$ ), a much higher proteome fraction is allocated to *measured-only* proteins. (b) Proteome investment into those biosynthetic proteins that are not part of the four pathway sets in Fig. 2. While predicted and observed concentrations of *shared* enzymes are strongly correlated ( $r_{\text{pathway}}^2 = 0.60$ ; Table 1) and the abundance of individual enzymes can be well explained by the predictions ( $r_{\text{individual}}^2 = 0.46$ ), the corresponding values differ on average by almost 3-fold ( $GMFE_{\text{pathway}} = 2.91$ ). (c) Proteome investment into enzymes of central metabolism that are not part of the five pathway sets in Fig. 3. The prediction increases with growth rate, whereas the measured data is largely independent of growth rate. Error bars extend from the 5th percentile to 95th percentile of 100 simulations, each with randomly perturbed turnover numbers.

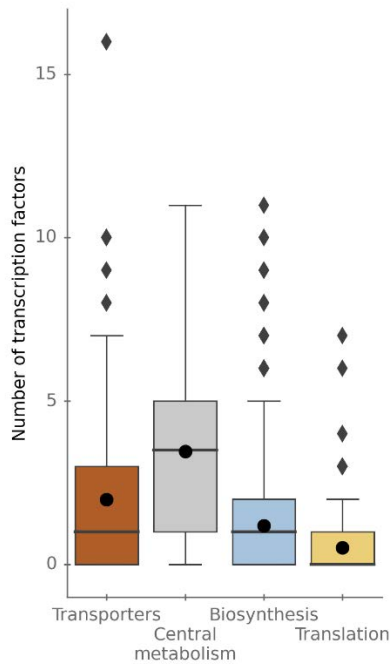

**Fig. S8. Genes in more central cellular processes are regulated by fewer transcription factors than genes in peripheral processes.** Genes encoding enzymes in biosynthesis pathways are regulated by fewer transcription factors than genes encoding transporters (one-sided Wilcoxon rank sum tests:  $p < 10^{-10}$ ) and central metabolism ( $p < 10^{-10}$ ). Genes in translation (here, all genes annotated with COG category “J”(4)) are also regulated by fewer transcription factors than genes in transporters ( $p < 10^{-10}$ ) and central metabolism ( $p < 10^{-10}$ ). Lines within boxes mark medians, dots indicate means. Boxes indicate 25% and 75% quantiles, whiskers extend from the boxes by 1.5x the interquartile range, diamonds are outliers.

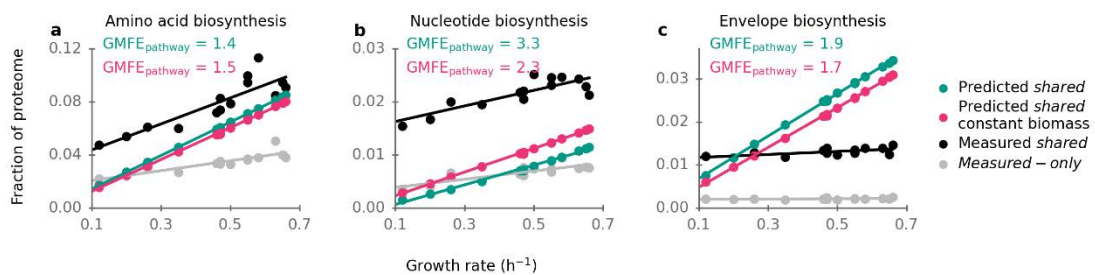

**Fig. S9. Comparison of predictions assuming growth rate-dependent biomass composition versus constant biomass composition.** (a) Amino acid biosynthesis pathway, (b) nucleotide biosynthesis pathway, and (c) cell envelope biosynthesis pathway. The composition of constant biomass was obtained from *iML1515* model.

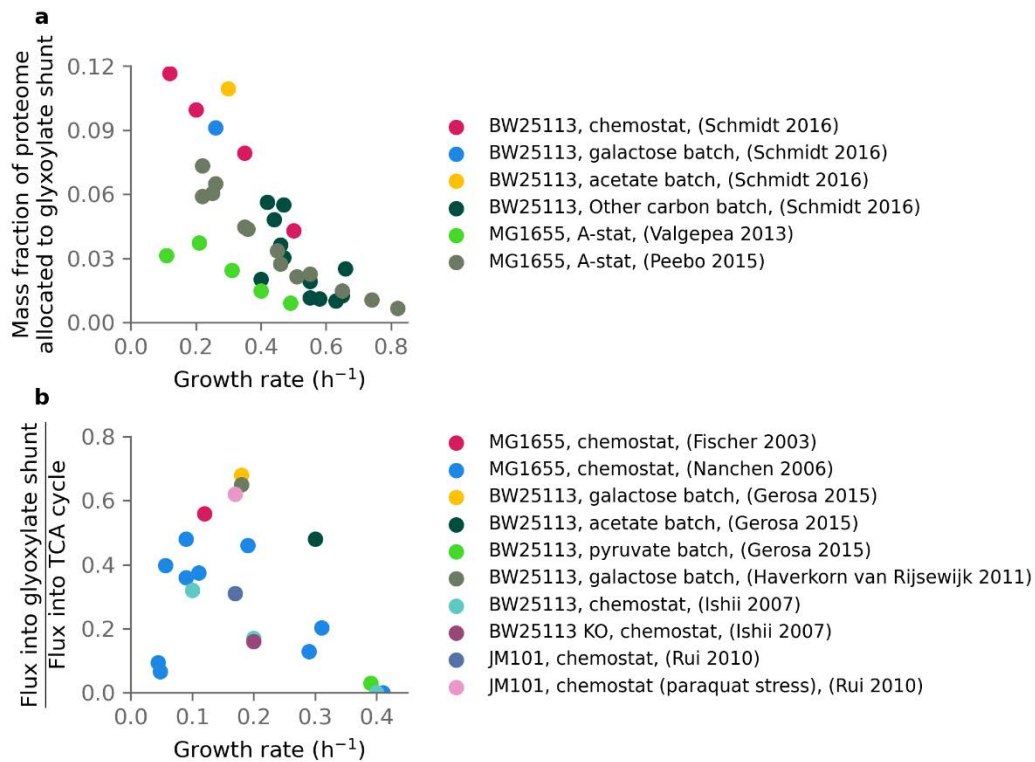

**Fig. S10. Growth rate-dependent activity of the glyoxylate shunt. (a)** Growth rate-dependent proteome allocation to the glyoxylate shunt, data from Refs. (5–7). **(b)** Growth rate-dependence of the flux through the glyoxylate shunt relative as a fraction of the flux into the TCA cycle. As the  $^{13}\text{C}$  metabolic flux analysis usually lumps linear sequential reaction sequences into a single reaction, flux into the TCA cycle is quantified through  $^{13}\text{C}$  measures of the flux of acetyl-CoA and oxaloacetate to isocitrate. The flux into the glyoxylate shunt is quantified through  $^{13}\text{C}$  measures of the flux catalyzed by Isocitrate lyase (isocitrate  $\rightarrow$  succinate + glyoxylate). Data from Refs. (8–13). Both protein abundance and flux decrease with increasing growth rate. The glyoxylate shunt’s high protein abundance and large flux at low growth rates mark it as an important alternative to the TCA cycle in these conditions.

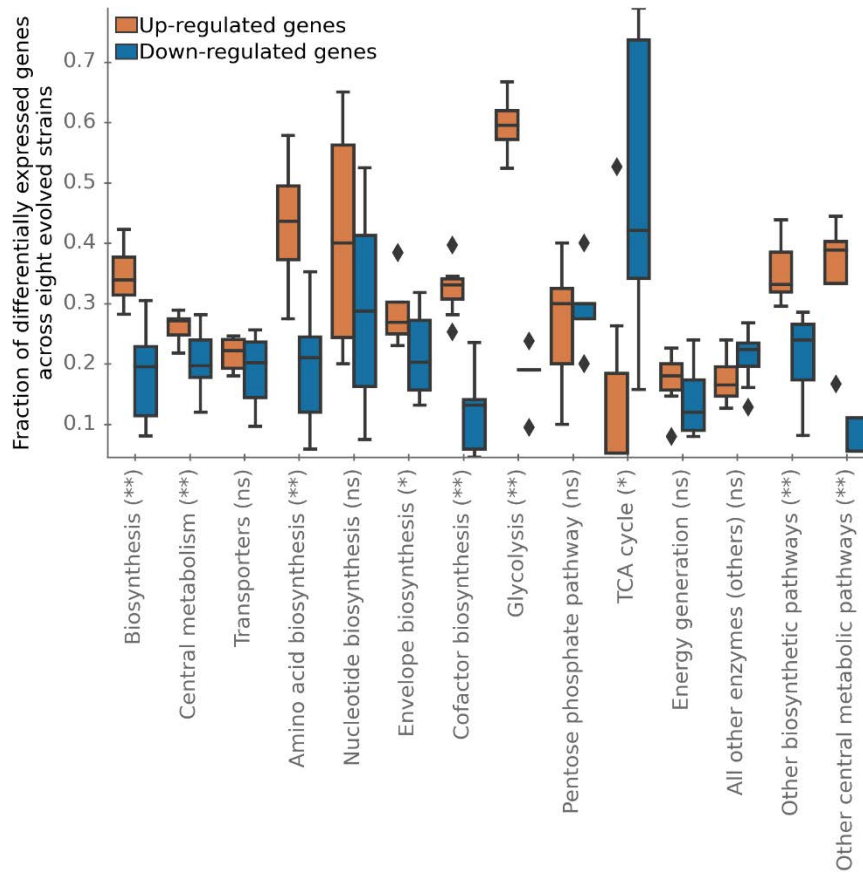

**Fig. S11. Fraction of differentially expressed genes in evolved strains grown on glucose minimal medium across pathways.** *P*-values of two-sided paired *t*-tests (*n* = 8) are denoted in brackets as follows: \*\* for *p* < 0.01, \* for *p* < 0.1, and ns for *p* ≥ 0.1 (non-significant).



## Supplementary References

1. Scott M, Gunderson CW, Mateescu EM, Zhang Z, Hwa T. 2010. Interdependence of cell growth and gene expression: origins and consequences. *Science* 330:1099–102.
2. Dai X, Zhu M, Warren M, Balakrishnan R, Patsalo V, Okano H, Williamson JR, Fredrick K, Wang Y-P, Hwa T. 2016. Reduction of translating ribosomes enables *Escherichia coli* to maintain elongation rates during slow growth. *Nat Microbiol* 2:16231.
3. Si F, Li D, Cox SE, Sauls JT, Azizi O, Sou C, Schwartz AB, Erickstad MJ, Jun Y, Li X, Jun S. 2017. Invariance of Initiation Mass and Predictability of Cell Size in *Escherichia coli*. *Curr Biol* 27:1278–1287.
4. Galperin MY, Wolf YI, Makarova KS, Vera Alvarez R, Landsman D, Koonin EV. 2021. COG database update: focus on microbial diversity, model organisms, and widespread pathogens. *Nucleic Acids Res* 49:D274–D281.
5. Schmidt A, Kochanowski K, Vedelaar S, Ahrne E, Volkmer B, Callipo L, Knoops K, Bauer M, Aebersold R, Heinemann M. 2016. The quantitative and condition-dependent *Escherichia coli* proteome. *Nat Biotechnol* 34:104–110.
6. Valgepea K, Adamberg K, Seiman A, Vilu R. 2013. *Escherichia coli* achieves faster growth by increasing catalytic and translation rates of proteins. *Mol Biosyst* 9:2344–2358.
7. Peebo K, Valgepea K, Maser A, Nahku R, Adamberg K, Vilu R. 2015. Proteome reallocation in *Escherichia coli* with increasing specific growth rate. *Mol BioSyst* 11:1184–1193.
8. Fischer E, Sauer U. 2003. A Novel Metabolic Cycle Catalyzes Glucose Oxidation and Anaplerosis in Hungry *Escherichia coli*. *J Biol Chem* 278:46446–46451.

9. Nanchen A, Schicker A, Sauer U. 2006. Nonlinear Dependency of Intracellular Fluxes on Growth Rate in Miniaturized Continuous Cultures of *Escherichia coli*. *Appl Environ Microbiol* 72:1164–1172.
10. Gerosa L, Haverkorn Van Rijsewijk BRB, Christodoulou D, Kochanowski K, Schmidt TSB, Noor E, Sauer U. 2015. Pseudo-transition Analysis Identifies the Key Regulators of Dynamic Metabolic Adaptations from Steady-State Data. *Cell Syst* 1:270–282.
11. Haverkorn van Rijsewijk BRB, Nanchen A, Nallet S, Kleijn RJ, Sauer U. 2011. Large-scale <sup>13</sup>C-flux analysis reveals distinct transcriptional control of respiratory and fermentative metabolism in *Escherichia coli*. *Mol Syst Biol* 7:477.
12. Ishii N, Nakahigashi K, Baba T, Robert M, Soga T, Kanai A, Hirasawa T, Naba M, Hirai K, Hoque A, Ho PY, Kakazu Y, Sugawara K, Igarashi S, Harada S, Masuda T, Sugiyama N, Togashi T, Hasegawa M, Takai Y, Yugi K, Arakawa K, Iwata N, Toya Y, Nakayama Y, Nishioka T, Shimizu K, Mori H, Tomita M. 2007. Multiple high-throughput analyses monitor the response of *E. coli* to perturbations. *Science* 316:593–7.
13. Rui B, Shen T, Zhou H, Liu J, Chen J, Pan X, Liu H, Wu J, Zheng H, Shi Y. 2010. A systematic investigation of *Escherichia coli* central carbon metabolism in response to superoxide stress. *BMC Syst Biol* 4:122.



Table S2: Enzyme turnover numbers and their sources

| Reaction id | value    | direction | source <sup>1</sup> |
|-------------|----------|-----------|---------------------|
| DHORTS      | 14.30024 | -1        | $k_{app,max}$       |
| OMPDC       | 58.99106 | 1         | $k_{app,max}$       |
| GSSD        | 9.681925 | 1         | $k_{app,max}$       |
| CS          | 31.49134 | 1         | $k_{app,max}$       |
| ICDHyr      | 10.0849  | 1         | $k_{app,max}$       |
| APRAUR      | 0.076305 | 1         | $k_{app,max}$       |
| DB4PS       | 0.091319 | 1         | $k_{app,max}$       |
| RBFK        | 0.086318 | 1         | $k_{app,max}$       |
| GLYK        | 1.422746 | 1         | $k_{app,max}$       |
| ASPTA       | 21.5778  | -1        | $k_{app,max}$       |
| RBFSb       | 0.024042 | 1         | $k_{app,max}$       |
| SHCHD2      | 0.131828 | 1         | $k_{app,max}$       |
| CPPPGO      | 0.696853 | 1         | $k_{app,max}$       |
| ILETA       | 8.458744 | -1        | $k_{app,max}$       |
| VALTA       | 19.05329 | -1        | $k_{app,max}$       |
| ORPT        | 80.85754 | -1        | $k_{app,max}$       |
| RBFSa       | 0.07372  | 1         | $k_{app,max}$       |
| PFK_3       | 108.1692 | 1         | $k_{app,max}$       |
| DHAD2       | 12.76649 | 1         | $k_{app,max}$       |
| PSCVT       | 8.659949 | 1         | $k_{app,max}$       |
| ANPRT       | 3.173382 | 1         | $k_{app,max}$       |
| CHORS       | 32.64963 | 1         | $k_{app,max}$       |
| IGPS        | 3.37822  | 1         | $k_{app,max}$       |
| DMATT       | 0.585096 | 1         | $k_{app,max}$       |
| GRTT        | 0.585096 | 1         | $k_{app,max}$       |
| UPP3S       | 0.912843 | 1         | $k_{app,max}$       |
| UPPDC1      | 0.068513 | 1         | $k_{app,max}$       |
| MOAT        | 10.66652 | 1         | $k_{app,max}$       |
| UDCPDPS     | 0.062705 | 1         | $k_{app,max}$       |
| USHD        | 16.5942  | 1         | $k_{app,max}$       |
| ENO         | 58.18488 | 1         | $k_{app,max}$       |
| MGSA        | 805.9263 | 1         | $k_{app,max}$       |
| IMPC        | 11.8847  | -1        | $k_{app,max}$       |
| IMPD        | 1.399624 | 1         | $k_{app,max}$       |
| LPADSS      | 8.700117 | 1         | $k_{app,max}$       |
| GLUTRS      | 0.120344 | 1         | $k_{app,max}$       |
| TDSK        | 16.71266 | 1         | $k_{app,max}$       |
| PGI         | 129.9447 | 1         | $k_{app,max}$       |
| TMPPP       | 0.021426 | 1         | $k_{app,max}$       |
| PGK         | 114.571  | -1        | $k_{app,max}$       |
| PGL         | 588.7476 | 1         | $k_{app,max}$       |
| DHQTi       | 40.31471 | 1         | $k_{app,max}$       |
| IPMD        | 9.643575 | 1         | $k_{app,max}$       |
| AIRC3       | 30.13264 | -1        | $k_{app,max}$       |
| ADSL2r      | 10.24187 | 1         | $k_{app,max}$       |
| TMDS        | 4.639885 | 1         | $k_{app,max}$       |
| PPCDC       | 0.073955 | 1         | $k_{app,max}$       |
| DHAD1       | 38.41795 | 1         | $k_{app,max}$       |
| FMNAT       | 0.086318 | 1         | $k_{app,max}$       |
| OHPBAT      | 0.001678 | 1         | $k_{app,max}$       |
| KARA1       | 3.787365 | -1        | $k_{app,max}$       |
| KARA2       | 1.258562 | 1         | $k_{app,max}$       |
| NADK        | 2.640962 | 1         | $k_{app,max}$       |
| SUCBZS      | 0.611389 | 1         | $k_{app,max}$       |
| DHBD        | 0.936895 | 1         | $k_{app,max}$       |
| ICHORT      | 0.113636 | 1         | $k_{app,max}$       |
| GLUTRR      | 12.14911 | 1         | $k_{app,max}$       |
| HEMEOS      | 0.445764 | 1         | $k_{app,max}$       |
| ADMDC       | 2.161437 | 1         | $k_{app,max}$       |
| LGTHL       | 64.4189  | 1         | $k_{app,max}$       |
| ARGSS       | 1.754436 | 1         | $k_{app,max}$       |
| AGPR        | 12.40352 | -1        | $k_{app,max}$       |
| SPMS        | 0.993811 | 1         | $k_{app,max}$       |
| G1SAT       | 0.168925 | 1         | $k_{app,max}$       |
| KDOCT2      | 1.446841 | 1         | $k_{app,max}$       |
| EDTXS1      | 6.821223 | 1         | $k_{app,max}$       |
| DXPS        | 1.027865 | 1         | $k_{app,max}$       |
| CDPMEK      | 4.086811 | 1         | $k_{app,max}$       |
| EDTXS2      | 3.793857 | 1         | $k_{app,max}$       |
| MECDPS      | 3.386297 | 1         | $k_{app,max}$       |
| PGAMT       | 2.249193 | -1        | $k_{app,max}$       |
| ICL         | 4.849202 | 1         | $k_{app,max}$       |
| UAGDP       | 7.491129 | 1         | $k_{app,max}$       |

<sup>1</sup> Note $k_{app,max}$ : in vivo enzyme turnover number estimated from experimental data by Heckmann *et al.* Ref. (31). $k_{app,ml}$ : in vivo enzyme turnover number estimated from machine learning by Heckmann *et al.* Ref. (31). $k_{cat}$ : in vitro enzyme turnover number from ccFBA by Desouki Ref. (27).transporter: transport reactions with no in vivo or in vitro parameters, set to 65 s<sup>-1</sup> according to Heckmann *et al.* Ref. (31).

|         |          |    |                      |
|---------|----------|----|----------------------|
| UAGCVT  | 1.397778 | 1  | K <sub>app,max</sub> |
| GLUR    | 32.76217 | -1 | K <sub>app,max</sub> |
| NNDPR   | 0.446503 | 1  | K <sub>app,max</sub> |
| DMQMT   | 0.021907 | 1  | K <sub>app,max</sub> |
| HPPK2   | 0.31375  | 1  | K <sub>app,max</sub> |
| PTPATi  | 1.286563 | 1  | K <sub>app,max</sub> |
| DXPRIi  | 3.079024 | 1  | K <sub>app,max</sub> |
| GTPCII2 | 0.068128 | 1  | K <sub>app,max</sub> |
| OHPHM   | 0.021907 | 1  | K <sub>app,max</sub> |
| GHMT2r  | 4.439337 | 1  | K <sub>app,max</sub> |
| DHORD2  | 38.53068 | 1  | K <sub>app,max</sub> |
| SDPDS   | 102.2286 | 1  | K <sub>app,max</sub> |
| ADCL    | 1.553082 | 1  | K <sub>app,max</sub> |
| TDPDRE  | 3.910464 | 1  | K <sub>app,max</sub> |
| TDPDRR  | 1.226032 | 1  | K <sub>app,max</sub> |
| UAPGR   | 5.838932 | 1  | K <sub>app,max</sub> |
| CTPS2   | 4.258782 | 1  | K <sub>app,max</sub> |
| PAPPT3  | 15.59233 | 1  | K <sub>app,max</sub> |
| UAGPT3  | 6.150296 | 1  | K <sub>app,max</sub> |
| GMHEPPA | 23.31693 | 1  | K <sub>app,max</sub> |
| S7PI    | 1.63139  | 1  | K <sub>app,max</sub> |
| AGMHE   | 0.934696 | 1  | K <sub>app,max</sub> |
| GMHEPAT | 1.806171 | 1  | K <sub>app,max</sub> |
| FADRx   | 0.088143 | 1  | K <sub>app,max</sub> |
| ACODA   | 10.97911 | 1  | K <sub>app,max</sub> |
| FCLT    | 1.301035 | 1  | K <sub>app,max</sub> |
| HBZOPT  | 0.567372 | 1  | K <sub>app,max</sub> |
| PNTK    | 0.227027 | 1  | K <sub>app,max</sub> |
| ADSS    | 1.84019  | 1  | K <sub>app,max</sub> |
| OCTDPS  | 1.287727 | 1  | K <sub>app,max</sub> |
| DPCOAK  | 1.333897 | 1  | K <sub>app,max</sub> |
| ASNS2   | 8.972534 | 1  | K <sub>app,max</sub> |
| KDOPS   | 0.763831 | 1  | K <sub>app,max</sub> |
| KDOPP   | 18.7249  | 1  | K <sub>app,max</sub> |
| DMPPS   | 0.148089 | 1  | K <sub>app,max</sub> |
| IPDPS   | 0.888064 | 1  | K <sub>app,max</sub> |
| DAPE    | 55.54165 | 1  | K <sub>app,max</sub> |
| DHDPRy  | 8.859222 | 1  | K <sub>app,max</sub> |
| HSK     | 151.8686 | 1  | K <sub>app,max</sub> |
| SDPTA   | 6.698489 | -1 | K <sub>app,max</sub> |
| THRS    | 28.64601 | 1  | K <sub>app,max</sub> |
| HSST    | 8.539119 | 1  | K <sub>app,max</sub> |
| PPNDH   | 17.86531 | 1  | K <sub>app,max</sub> |
| DTMPK   | 7.94476  | 1  | K <sub>app,max</sub> |
| RHCCE   | 0.015614 | 1  | K <sub>app,max</sub> |
| G3PD2   | 42.97261 | -1 | K <sub>app,max</sub> |
| GMPS2   | 2.395951 | 1  | K <sub>app,max</sub> |
| GALUi   | 1.309006 | 1  | K <sub>app,max</sub> |
| U23GAAT | 1.39172  | 1  | K <sub>app,max</sub> |
| UAAGDS  | 4.160067 | 1  | K <sub>app,max</sub> |
| UAMAS   | 2.786797 | 1  | K <sub>app,max</sub> |
| UAMAGS  | 4.523614 | 1  | K <sub>app,max</sub> |
| P5CR    | 23.66027 | 1  | K <sub>app,max</sub> |
| DHPPDA2 | 0.076305 | 1  | K <sub>app,max</sub> |
| ASP1DC  | 0.041348 | 1  | K <sub>app,max</sub> |
| UGMDDS  | 8.68655  | 1  | K <sub>app,max</sub> |
| DBTS    | 0.003799 | 1  | K <sub>app,max</sub> |
| UHGADA  | 12.98895 | 1  | K <sub>app,max</sub> |
| ATPPRT  | 3.754474 | 1  | K <sub>app,max</sub> |
| HISTD   | 3.179596 | 1  | K <sub>app,max</sub> |
| DHDPS   | 7.126217 | 1  | K <sub>app,max</sub> |
| G1PACT  | 7.491129 | 1  | K <sub>app,max</sub> |
| GF6PTA  | 2.021826 | 1  | K <sub>app,max</sub> |
| IGPDH   | 3.333692 | 1  | K <sub>app,max</sub> |
| PRPPS   | 17.03327 | 1  | K <sub>app,max</sub> |
| GLUCYS  | 0.016512 | 1  | K <sub>app,max</sub> |
| PRATPP  | 9.319031 | 1  | K <sub>app,max</sub> |
| PRMICI  | 13.48006 | 1  | K <sub>app,max</sub> |
| GLUPRT  | 18.65284 | 1  | K <sub>app,max</sub> |
| SERAT   | 21.21567 | 1  | K <sub>app,max</sub> |
| NADS1   | 0.122167 | 1  | K <sub>app,max</sub> |
| BPNT    | 84.84513 | 1  | K <sub>app,max</sub> |
| ASAD    | 18.63376 | -1 | K <sub>app,max</sub> |
| DAPDC   | 55.701   | 1  | K <sub>app,max</sub> |
| GARFT   | 57.1662  | 1  | K <sub>app,max</sub> |
| PPND    | 19.97671 | 1  | K <sub>app,max</sub> |

|                       |          |   |                             |
|-----------------------|----------|---|-----------------------------|
| METAT                 | 0.054295 | 1 | <i>k</i> <sub>app,max</sub> |
| PRAMPC                | 9.319031 | 1 | <i>k</i> <sub>app,max</sub> |
| TMPK                  | 0.206249 | 1 | <i>k</i> <sub>app,max</sub> |
| PPBNGS                | 0.158583 | 1 | <i>k</i> <sub>app,max</sub> |
| PPNCL2                | 0.073955 | 1 | <i>k</i> <sub>app,max</sub> |
| PRAGS <sub>r</sub>    | 13.68985 | 1 | <i>k</i> <sub>app,max</sub> |
| PRFGS                 | 10.23022 | 1 | <i>k</i> <sub>app,max</sub> |
| NNAT <sub>r</sub>     | 5.322368 | 1 | <i>k</i> <sub>app,max</sub> |
| PSERT                 | 37.41342 | 1 | <i>k</i> <sub>app,max</sub> |
| AIRC2                 | 48.17105 | 1 | <i>k</i> <sub>app,max</sub> |
| GAPD                  | 35.76496 | 1 | <i>k</i> <sub>app,max</sub> |
| HEX1                  | 305.0672 | 1 | <i>k</i> <sub>app,max</sub> |
| GND                   | 66.7612  | 1 | <i>k</i> <sub>app,max</sub> |
| MOAT2                 | 10.66652 | 1 | <i>k</i> <sub>app,max</sub> |
| G6PDH2 <sub>r</sub>   | 163.6787 | 1 | <i>k</i> <sub>app,max</sub> |
| ARGSL                 | 8.567866 | 1 | <i>k</i> <sub>app,max</sub> |
| GLU5K                 | 12.22192 | 1 | <i>k</i> <sub>app,max</sub> |
| IPPS                  | 8.606867 | 1 | <i>k</i> <sub>app,max</sub> |
| MOHMT                 | 0.029624 | 1 | <i>k</i> <sub>app,max</sub> |
| AHCYSNS               | 0.052337 | 1 | <i>k</i> <sub>app,max</sub> |
| SERAS <sub>r</sub>    | 0.209118 | 1 | <i>k</i> <sub>app,max</sub> |
| CHRPL                 | 0.543619 | 1 | <i>k</i> <sub>app,max</sub> |
| FBA3                  | 29.27115 | 1 | <i>k</i> <sub>app,max</sub> |
| PMPK                  | 0.03897  | 1 | <i>k</i> <sub>app,max</sub> |
| PSP_L                 | 2693.142 | 1 | <i>k</i> <sub>app,max</sub> |
| ADK3                  | 14.77674 | 1 | <i>k</i> <sub>app,max</sub> |
| ADSK                  | 85.07205 | 1 | <i>k</i> <sub>app,max</sub> |
| SHSL1                 | 7.32263  | 1 | <i>k</i> <sub>app,max</sub> |
| GMHEPK                | 1.806171 | 1 | <i>k</i> <sub>app,max</sub> |
| GTPCI                 | 0.009085 | 1 | <i>k</i> <sub>app,max</sub> |
| CYTK1                 | 14.9248  | 1 | <i>k</i> <sub>app,max</sub> |
| GK1                   | 37.5363  | 1 | <i>k</i> <sub>app,max</sub> |
| DHFS                  | 0.119841 | 1 | <i>k</i> <sub>app,max</sub> |
| ASPO6                 | 1.248945 | 1 | <i>k</i> <sub>app,max</sub> |
| PRASCS <sub>i</sub>   | 5.514622 | 1 | <i>k</i> <sub>app,max</sub> |
| DHPS2                 | 0.371229 | 1 | <i>k</i> <sub>app,max</sub> |
| MTHFC                 | 40.91791 | 1 | <i>k</i> <sub>app,max</sub> |
| MTHFD                 | 40.91791 | 1 | <i>k</i> <sub>app,max</sub> |
| QULNS                 | 0.724281 | 1 | <i>k</i> <sub>app,max</sub> |
| GLCTR1                | 17.76051 | 1 | <i>k</i> <sub>app,max</sub> |
| GLCTR3                | 10.85577 | 1 | <i>k</i> <sub>app,max</sub> |
| HEPT4                 | 6.874304 | 1 | <i>k</i> <sub>app,max</sub> |
| CBLAT                 | 0.204043 | 1 | <i>k</i> <sub>app,max</sub> |
| NH4 <sub>tp</sub>     | 8586.02  | 1 | <i>k</i> <sub>app,max</sub> |
| GLYCLT4 <sub>pp</sub> | 0.661979 | 1 | <i>k</i> <sub>app,max</sub> |
| ACGK                  | 6.482128 | 1 | <i>k</i> <sub>app,max</sub> |
| HMBS                  | 0.194692 | 1 | <i>k</i> <sub>app,max</sub> |
| MEPCT                 | 13.96947 | 1 | <i>k</i> <sub>app,max</sub> |
| DAAD                  | 0.212326 | 1 | <i>k</i> <sub>app,max</sub> |
| GLCt2 <sub>pp</sub>   | 266.8132 | 1 | <i>k</i> <sub>app,max</sub> |
| HSTPT                 | 5.95604  | 1 | <i>k</i> <sub>app,max</sub> |
| THDPS                 | 1.677663 | 1 | <i>k</i> <sub>app,max</sub> |
| GLYOX                 | 2609.268 | 1 | <i>k</i> <sub>app,max</sub> |
| PRA <sub>li</sub>     | 3.37822  | 1 | <i>k</i> <sub>app,max</sub> |
| MTHFR2                | 3.720112 | 1 | <i>k</i> <sub>app,max</sub> |
| MTAN                  | 0.444461 | 1 | <i>k</i> <sub>app,max</sub> |
| AMAOT <sub>r</sub>    | 0.000662 | 1 | <i>k</i> <sub>app,max</sub> |
| GTHS                  | 0.016597 | 1 | <i>k</i> <sub>app,max</sub> |
| ACGS                  | 25.92218 | 1 | <i>k</i> <sub>app,max</sub> |
| HEPT1                 | 15.56121 | 1 | <i>k</i> <sub>app,max</sub> |
| HEPT2                 | 4.951763 | 1 | <i>k</i> <sub>app,max</sub> |
| MOAT3C                | 15.80545 | 1 | <i>k</i> <sub>app,max</sub> |
| RHAT1                 | 19.01035 | 1 | <i>k</i> <sub>app,max</sub> |
| GALT1                 | 9.122473 | 1 | <i>k</i> <sub>app,max</sub> |
| GLCTR2                | 17.99057 | 1 | <i>k</i> <sub>app,max</sub> |
| HEPK1                 | 9.747015 | 1 | <i>k</i> <sub>app,max</sub> |
| HEPT3                 | 12.10135 | 1 | <i>k</i> <sub>app,max</sub> |
| HEPK2                 | 12.15066 | 1 | <i>k</i> <sub>app,max</sub> |
| SHCHF                 | 0.131828 | 1 | <i>k</i> <sub>app,max</sub> |
| SUCBZL                | 1.396733 | 1 | <i>k</i> <sub>app,max</sub> |
| PRAIS                 | 14.58303 | 1 | <i>k</i> <sub>app,max</sub> |
| PANTS                 | 0.028019 | 1 | <i>k</i> <sub>app,max</sub> |
| GCALDD                | 0.042906 | 1 | <i>k</i> <sub>app,max</sub> |
| HISTP                 | 3.333692 | 1 | <i>k</i> <sub>app,max</sub> |
| KAS15                 | 14.98418 | 1 | <i>k</i> <sub>app,max</sub> |
| T2DECAI               | 2.047433 | 1 | <i>k</i> <sub>app,max</sub> |

|             |          |    |               |
|-------------|----------|----|---------------|
| 3OAS161     | 1.876475 | 1  | $k_{app,max}$ |
| DHQS        | 38.1248  | 1  | $k_{app,max}$ |
| EAR161x     | 1.491904 | 1  | $k_{app,max}$ |
| DASYN160    | 111.4841 | 1  | $k_{app,max}$ |
| DASYN161    | 86.71167 | 1  | $k_{app,max}$ |
| DASYN181    | 44.69031 | 1  | $k_{app,max}$ |
| PGCD        | 37.46429 | 1  | $k_{app,max}$ |
| PG161abcpp  | 0.832095 | 1  | $k_{app,max}$ |
| 3OAS141     | 1.876475 | 1  | $k_{app,max}$ |
| 3OAR121     | 3.763232 | 1  | $k_{app,max}$ |
| ADSL1r      | 4.036562 | 1  | $k_{app,max}$ |
| AICART      | 11.8847  | 1  | $k_{app,max}$ |
| PG160abcpp  | 1.069765 | 1  | $k_{app,max}$ |
| DHBS        | 0.509428 | 1  | $k_{app,max}$ |
| PPGO3       | 0.184466 | 1  | $k_{app,max}$ |
| OMBZLM      | 0.013342 | 1  | $k_{app,max}$ |
| EAR141x     | 1.491904 | 1  | $k_{app,max}$ |
| EAR181x     | 0.507402 | 1  | $k_{app,max}$ |
| TPI         | 193.9066 | 1  | $k_{app,max}$ |
| PERD        | 0.016316 | 1  | $k_{app,max}$ |
| 5DOAN       | 0.029921 | 1  | $k_{app,max}$ |
| 3OAR120     | 4.480061 | 1  | $k_{app,max}$ |
| SO4t2pp     | 248.6991 | 1  | $k_{app,max}$ |
| DHNAOT4     | 0.356291 | 1  | $k_{app,max}$ |
| PSSA161     | 2.879332 | 1  | $k_{app,max}$ |
| PSD160      | 5.497192 | 1  | $k_{app,max}$ |
| PSD161      | 4.275621 | 1  | $k_{app,max}$ |
| COLIPAabcpp | 0.808873 | 1  | $k_{app,max}$ |
| 3OAR181     | 1.27989  | 1  | $k_{app,max}$ |
| EAR140x     | 1.350815 | 1  | $k_{app,max}$ |
| 3OAS181     | 1.316407 | 1  | $k_{app,max}$ |
| AGPAT160    | 30.0267  | 1  | $k_{app,max}$ |
| PGSA160     | 12.65921 | 1  | $k_{app,max}$ |
| 3OAR140     | 4.265518 | 1  | $k_{app,max}$ |
| 3OAR160     | 3.192801 | 1  | $k_{app,max}$ |
| PGSA161     | 9.846652 | 1  | $k_{app,max}$ |
| 3OAR141     | 3.763232 | 1  | $k_{app,max}$ |
| 3OAR161     | 3.763232 | 1  | $k_{app,max}$ |
| EAR121x     | 1.491904 | 1  | $k_{app,max}$ |
| PE160abcpp  | 3.155509 | 1  | $k_{app,max}$ |
| PE161abcpp  | 2.454306 | 1  | $k_{app,max}$ |
| PG181abcpp  | 0.428799 | 1  | $k_{app,max}$ |
| PGSA181     | 5.074589 | 1  | $k_{app,max}$ |
| PSSA160     | 3.701974 | 1  | $k_{app,max}$ |
| PSSA181     | 1.484009 | 1  | $k_{app,max}$ |
| AGPAT181    | 12.03672 | 1  | $k_{app,max}$ |
| 3OAR60      | 8.243372 | 1  | $k_{app,max}$ |
| 3OAR80      | 8.243372 | 1  | $k_{app,max}$ |
| EAR100x     | 1.776085 | 1  | $k_{app,max}$ |
| EAR120x     | 1.776085 | 1  | $k_{app,max}$ |
| EAR160x     | 1.265761 | 1  | $k_{app,max}$ |
| 3OAS121     | 1.876475 | 1  | $k_{app,max}$ |
| 3OAR40      | 8.243372 | 1  | $k_{app,max}$ |
| 3OAR100     | 8.243293 | 1  | $k_{app,max}$ |
| AGPAT161    | 23.3546  | 1  | $k_{app,max}$ |
| EAR40x      | 3.268021 | 1  | $k_{app,max}$ |
| PSD181      | 2.203657 | 1  | $k_{app,max}$ |
| EAR60x      | 3.268021 | 1  | $k_{app,max}$ |
| EAR80x      | 3.268021 | 1  | $k_{app,max}$ |
| PE181abcpp  | 1.264962 | 1  | $k_{app,max}$ |
| ZN2tpp      | 0.431349 | 1  | $k_{app,max}$ |
| CAT6pp      | 1.058014 | -1 | $k_{app,max}$ |
| AMMQLT8     | 0.013342 | 1  | $k_{app,max}$ |
| DALat2pp    | 3.342165 | 1  | $k_{app,max}$ |
| FE2tpp      | 10.82699 | 1  | $k_{app,max}$ |
| MN2tpp      | 0.87601  | 1  | $k_{app,max}$ |
| MALCOAMT    | 0.002455 | 1  | $k_{app,max}$ |
| CU2tpp      | 0.897312 | 1  | $k_{app,max}$ |
| OGMEACPS    | 9.57E-05 | 1  | $k_{app,max}$ |
| OGMEACPR    | 5.26E-05 | 1  | $k_{app,max}$ |
| OPMEACPS    | 2.62E-05 | 1  | $k_{app,max}$ |
| MPTAT       | 0.077786 | 1  | $k_{app,max}$ |
| OPMEACPD    | 9.10E-05 | 1  | $k_{app,max}$ |
| EPMEACPR    | 2.09E-05 | 1  | $k_{app,max}$ |
| AOXsr2      | 0.001779 | 1  | $k_{app,max}$ |
| OGMEACPD    | 9.10E-05 | 1  | $k_{app,max}$ |

|          |          |    |               |
|----------|----------|----|---------------|
| EGMEACPR | 2.09E-05 | 1  | $k_{app,max}$ |
| OPMEACPR | 5.26E-05 | 1  | $k_{app,max}$ |
| PMEACPE  | 0.002756 | 1  | $k_{app,max}$ |
| ICYSDS   | 0.021592 | 1  | $k_{app,max}$ |
| I4FE4SR  | 0.01136  | 1  | $k_{app,max}$ |
| BMOCOS   | 0.010176 | 1  | $k_{app,max}$ |
| FESR     | 4.942637 | 1  | $k_{app,max}$ |
| BTS5     | 0.000739 | 1  | $k_{app,max}$ |
| LIPOS    | 0.000242 | 1  | $k_{app,max}$ |
| MPTSS    | 0.380772 | 1  | $k_{app,max}$ |
| LIPOCT   | 0.002578 | 1  | $k_{app,max}$ |
| VPAMTr   | 49.25294 | -1 | $k_{app,max}$ |
| DHNPA2r  | 2.917904 | 1  | $k_{app,max}$ |
| SEPHCHCS | 1.474107 | 1  | $k_{app,max}$ |
| DHNCOAS  | 0.052986 | 1  | $k_{app,max}$ |
| DHNCOAT  | 0.683201 | 1  | $k_{app,max}$ |
| TYRL     | 0.014337 | 1  | $k_{app,max}$ |
| MOCOS    | 0.011404 | 1  | $k_{app,max}$ |
| CYTDK2   | 3.633271 | 1  | $k_{app,ml}$  |
| NDPK5    | 5.004318 | 1  | $k_{app,ml}$  |
| NDPK5    | 3.760914 | -1 | $k_{app,ml}$  |
| NDPK6    | 0.096211 | 1  | $k_{app,ml}$  |
| NDPK6    | 4.9978   | -1 | $k_{app,ml}$  |
| NDPK8    | 3.948568 | 1  | $k_{app,ml}$  |
| NDPK8    | 2.493469 | -1 | $k_{app,ml}$  |
| PYNP2r   | 6.931895 | 1  | $k_{app,ml}$  |
| PYNP2r   | 3.136084 | -1 | $k_{app,ml}$  |
| ICDHyr   | 3.74751  | -1 | $k_{app,ml}$  |
| ALATA_L2 | 3.880836 | 1  | $k_{app,ml}$  |
| DURIPP   | 3.250846 | 1  | $k_{app,ml}$  |
| ACALD    | 16.37094 | 1  | $k_{app,ml}$  |
| ACALD    | 8.194523 | -1 | $k_{app,ml}$  |
| PTRCTA   | 3.899522 | 1  | $k_{app,ml}$  |
| CYSDS    | 2.611557 | 1  | $k_{app,ml}$  |
| MAN6PI   | 2.817264 | -1 | $k_{app,ml}$  |
| TRPAS2   | 3.364753 | -1 | $k_{app,ml}$  |
| ALATA_L  | 12.19887 | -1 | $k_{app,ml}$  |
| PPM      | 2.86429  | 1  | $k_{app,ml}$  |
| ACP1_FMN | 3.891823 | 1  | $k_{app,ml}$  |
| NDP3     | 5.563382 | 1  | $k_{app,ml}$  |
| CDPPH    | 5.226493 | 1  | $k_{app,ml}$  |
| NDP7     | 5.226493 | 1  | $k_{app,ml}$  |
| ALATA_D2 | 3.880836 | 1  | $k_{app,ml}$  |
| PMDPHT   | 0.188859 | 1  | $k_{app,ml}$  |
| GTHOr    | 2.287207 | -1 | $k_{app,ml}$  |
| GLYCTO2  | 1.57191  | 1  | $k_{app,ml}$  |
| GLYCTO3  | 1.484281 | 1  | $k_{app,ml}$  |
| IPPMib   | 3.659187 | 1  | $k_{app,ml}$  |
| IPPMib   | 8.523155 | -1 | $k_{app,ml}$  |
| GLYCTO4  | 1.484013 | 1  | $k_{app,ml}$  |
| ACHBS    | 7.395987 | 1  | $k_{app,ml}$  |
| ACLS     | 29.79637 | 1  | $k_{app,ml}$  |
| G3PD5    | 2.686021 | 1  | $k_{app,ml}$  |
| G1PP     | 0.056349 | 1  | $k_{app,ml}$  |
| TMDPP    | 2.991571 | -1 | $k_{app,ml}$  |
| ECOAH6   | 4.236997 | 1  | $k_{app,ml}$  |
| ECOAH6   | 2.418356 | -1 | $k_{app,ml}$  |
| ENO      | 53.81454 | -1 | $k_{app,ml}$  |
| FBA      | 42.12004 | -1 | $k_{app,ml}$  |
| HCO3E    | 6.099103 | -1 | $k_{app,ml}$  |
| IMPC     | 4.277784 | 1  | $k_{app,ml}$  |
| ECOAH4   | 5.827645 | 1  | $k_{app,ml}$  |
| ECOAH4   | 3.17966  | -1 | $k_{app,ml}$  |
| NTPP1    | 23.34322 | 1  | $k_{app,ml}$  |
| URIK1    | 3.576691 | 1  | $k_{app,ml}$  |
| URIK2    | 3.633271 | 1  | $k_{app,ml}$  |
| NTPP2    | 23.34322 | 1  | $k_{app,ml}$  |
| NTPP2    | 29.25939 | 1  | $k_{app,ml}$  |
| CYTDK1   | 3.576691 | 1  | $k_{app,ml}$  |
| AIRC3    | 7.516071 | 1  | $k_{app,ml}$  |
| TALA     | 39.83541 | 1  | $k_{app,ml}$  |
| ADSL2r   | 3.193393 | -1 | $k_{app,ml}$  |
| TKT1     | 6.0799   | -1 | $k_{app,ml}$  |
| RNDR1    | 0.923364 | 1  | $k_{app,ml}$  |
| RNDR4    | 0.00941  | 1  | $k_{app,ml}$  |
| LYSAM    | 3.126748 | 1  | $k_{app,ml}$  |



|              |          |    |          |
|--------------|----------|----|----------|
| LYSAM        | 3.126748 | -1 | K_app,ml |
| FTHFD        | 46.06887 | 1  | K_app,ml |
| IPPM1a       | 3.336187 | 1  | K_app,ml |
| IPPM1a       | 8.230083 | -1 | K_app,ml |
| G3PD7        | 2.589234 | 1  | K_app,ml |
| EDD          | 22.88964 | 1  | K_app,ml |
| NADH9        | 2.403306 | 1  | K_app,ml |
| ADK4         | 4.506135 | 1  | K_app,ml |
| ADK4         | 4.281521 | -1 | K_app,ml |
| INSK         | 3.979366 | 1  | K_app,ml |
| OHPBAT       | 0.06708  | -1 | K_app,ml |
| NADDP        | 2.587898 | 1  | K_app,ml |
| HEX4         | 3.469276 | 1  | K_app,ml |
| KARA2        | 2.607869 | -1 | K_app,ml |
| ICHORS_copy2 | 7.732491 | 1  | K_app,ml |
| ICHORS_copy2 | 6.314789 | -1 | K_app,ml |
| DHBD         | 2.377994 | -1 | K_app,ml |
| RBP4E        | 3.032085 | -1 | K_app,ml |
| TARTD        | 3.088357 | 1  | K_app,ml |
| PDXPP        | 4.055824 | 1  | K_app,ml |
| HACD6        | 3.339417 | 1  | K_app,ml |
| HACD6        | 2.576447 | -1 | K_app,ml |
| ECOAH1       | 5.435808 | 1  | K_app,ml |
| ECOAH2       | 5.843902 | 1  | K_app,ml |
| ECOAH2       | 3.217962 | -1 | K_app,ml |
| AGPR         | 3.582858 | 1  | K_app,ml |
| ECOAH3       | 5.841133 | 1  | K_app,ml |
| ECOAH3       | 3.218444 | -1 | K_app,ml |
| ALTRH        | 2.85554  | 1  | K_app,ml |
| GUI1         | 2.725522 | 1  | K_app,ml |
| GUI1         | 2.725522 | -1 | K_app,ml |
| EDXS3        | 3.892001 | 1  | K_app,ml |
| PGAMT        | 3.095659 | 1  | K_app,ml |
| EDXS4        | 4.834386 | 1  | K_app,ml |
| PMANM        | 2.995768 | -1 | K_app,ml |
| UAG2E        | 3.055023 | -1 | K_app,ml |
| GLYCL        | 8.970031 | 1  | K_app,ml |
| CMPN         | 11.29015 | 1  | K_app,ml |
| TRE6PH       | 9.31694  | 1  | K_app,ml |
| ICHORS_copy3 | 7.712237 | 1  | K_app,ml |
| HACD4        | 3.353535 | 1  | K_app,ml |
| HACD4        | 2.35958  | -1 | K_app,ml |
| CINND0       | 2.766831 | 1  | K_app,ml |
| DHPPD        | 2.733627 | 1  | K_app,ml |
| HACD5        | 3.60068  | 1  | K_app,ml |
| HACD5        | 2.500709 | -1 | K_app,ml |
| DHCIND       | 2.733627 | 1  | K_app,ml |
| HACD7        | 3.281245 | 1  | K_app,ml |
| HACD7        | 2.536963 | -1 | K_app,ml |
| CITL         | 6.392752 | 1  | K_app,ml |
| GOFUCR       | 2.275287 | 1  | K_app,ml |
| DNMPPA       | 2.750124 | 1  | K_app,ml |
| SADT2        | 4.711474 | 1  | K_app,ml |
| OPHBDC       | 1.522857 | 1  | K_app,ml |
| AACPS1       | 0.473365 | 1  | K_app,ml |
| GHMT2r       | 4.716639 | -1 | K_app,ml |
| LCARS        | 2.751624 | 1  | K_app,ml |
| LCARS        | 18.49761 | -1 | K_app,ml |
| ALCD19       | 11.22635 | 1  | K_app,ml |
| ALCD19       | 3.933228 | -1 | K_app,ml |
| RMPA         | 3.08298  | -1 | K_app,ml |
| SBTPD        | 2.728479 | 1  | K_app,ml |
| SBTPD        | 2.501926 | -1 | K_app,ml |
| PFK_2        | 6.244474 | 1  | K_app,ml |
| GLTPD        | 2.635642 | 1  | K_app,ml |
| GLTPD        | 2.59837  | -1 | K_app,ml |
| ACACCT       | 2.846615 | 1  | K_app,ml |
| BUTCT        | 2.752224 | 1  | K_app,ml |
| TGBPA        | 3.29865  | -1 | K_app,ml |
| MANAO        | 2.559645 | 1  | K_app,ml |
| MANAO        | 2.955656 | -1 | K_app,ml |
| TAGURr       | 2.578188 | 1  | K_app,ml |
| TAGURr       | 2.951025 | -1 | K_app,ml |
| 2DGULRx      | 2.17844  | 1  | K_app,ml |
| DKGLCNR2y    | 2.448182 | 1  | K_app,ml |
| 2DGULRy      | 2.448182 | 1  | K_app,ml |

|          |          |    |                     |
|----------|----------|----|---------------------|
| DHAPT    | 1.008448 | 1  | K <sub>app,ml</sub> |
| UMPK     | 4.601321 | -1 | K <sub>app,ml</sub> |
| RZ5PP    | 5.385396 | 1  | K <sub>app,ml</sub> |
| DDPGALA  | 3.250094 | -1 | K <sub>app,ml</sub> |
| DURIK1   | 6.997138 | 1  | K <sub>app,ml</sub> |
| G3PD6    | 2.589234 | 1  | K <sub>app,ml</sub> |
| NDPK7    | 4.9978   | -1 | K <sub>app,ml</sub> |
| GLYAT    | 10.53765 | 1  | K <sub>app,ml</sub> |
| GLYAT    | 5.520045 | -1 | K <sub>app,ml</sub> |
| ADNUC    | 3.447988 | 1  | K <sub>app,ml</sub> |
| F6PA     | 6.249798 | 1  | K <sub>app,ml</sub> |
| F6PA     | 11.29118 | -1 | K <sub>app,ml</sub> |
| CRNBCT   | 3.236285 | 1  | K <sub>app,ml</sub> |
| CRNBCT   | 3.236285 | -1 | K <sub>app,ml</sub> |
| CRNCBCT  | 3.236285 | 1  | K <sub>app,ml</sub> |
| CRNCBCT  | 3.236285 | -1 | K <sub>app,ml</sub> |
| CRNCDH   | 4.078269 | 1  | K <sub>app,ml</sub> |
| CRNCDH   | 4.078269 | -1 | K <sub>app,ml</sub> |
| IDOND    | 2.670143 | 1  | K <sub>app,ml</sub> |
| IDOND    | 17.8758  | -1 | K <sub>app,ml</sub> |
| IDOND2   | 17.11058 | 1  | K <sub>app,ml</sub> |
| NADN     | 21.87028 | 1  | K <sub>app,ml</sub> |
| GLYCLTDx | 2.401812 | 1  | K <sub>app,ml</sub> |
| NDPK2    | 19.10756 | 1  | K <sub>app,ml</sub> |
| NDPK2    | 6.490113 | -1 | K <sub>app,ml</sub> |
| NDPK3    | 11.67335 | 1  | K <sub>app,ml</sub> |
| NDPK3    | 4.9978   | -1 | K <sub>app,ml</sub> |
| HPYRRy   | 12.34104 | 1  | K <sub>app,ml</sub> |
| NDPK4    | 4.9978   | -1 | K <sub>app,ml</sub> |
| HETZK    | 3.805523 | 1  | K <sub>app,ml</sub> |
| MCOATA   | 2.622024 | -1 | K <sub>app,ml</sub> |
| AST      | 3.243138 | 1  | K <sub>app,ml</sub> |
| SGDS     | 6.736857 | 1  | K <sub>app,ml</sub> |
| CYNTHA   | 2.868002 | 1  | K <sub>app,ml</sub> |
| SDPTA    | 4.120056 | 1  | K <sub>app,ml</sub> |
| TMAOR2   | 2.26961  | 1  | K <sub>app,ml</sub> |
| DGK1     | 3.378429 | -1 | K <sub>app,ml</sub> |
| DTMPK    | 3.421685 | -1 | K <sub>app,ml</sub> |
| NDPK1    | 3.292598 | -1 | K <sub>app,ml</sub> |
| DDPA     | 10.95666 | 1  | K <sub>app,ml</sub> |
| NMNDA    | 20.73942 | 1  | K <sub>app,ml</sub> |
| PGMT     | 22.12188 | -1 | K <sub>app,ml</sub> |
| FRUK     | 63.07576 | 1  | K <sub>app,ml</sub> |
| TDPADGAT | 4.807875 | 1  | K <sub>app,ml</sub> |
| MALS     | 32.55933 | 1  | K <sub>app,ml</sub> |
| X5PL3E   | 3.45401  | 1  | K <sub>app,ml</sub> |
| DOGULNR  | 3.051568 | 1  | K <sub>app,ml</sub> |
| BETALDHx | 2.585938 | 1  | K <sub>app,ml</sub> |
| MLTG3    | 0.272841 | 1  | K <sub>app,ml</sub> |
| DKGLCNR1 | 2.508822 | 1  | K <sub>app,ml</sub> |
| NADTRHD  | 24.51586 | 1  | K <sub>app,ml</sub> |
| AACPS2   | 2.004406 | 1  | K <sub>app,ml</sub> |
| FMNRx2   | 2.27405  | 1  | K <sub>app,ml</sub> |
| ARAI     | 2.740122 | -1 | K <sub>app,ml</sub> |
| FCI      | 2.646269 | 1  | K <sub>app,ml</sub> |
| FCI      | 2.646269 | -1 | K <sub>app,ml</sub> |
| FCLK     | 2.90671  | 1  | K <sub>app,ml</sub> |
| FCLPA    | 3.027816 | 1  | K <sub>app,ml</sub> |
| FCLPA    | 2.841457 | -1 | K <sub>app,ml</sub> |
| GSNK     | 4.019751 | 1  | K <sub>app,ml</sub> |
| AACPS3   | 1.470615 | 1  | K <sub>app,ml</sub> |
| AACPS4   | 1.572154 | 1  | K <sub>app,ml</sub> |
| UGLYCH   | 5.374962 | 1  | K <sub>app,ml</sub> |
| NTPP3    | 8.841867 | 1  | K <sub>app,ml</sub> |
| NTPP6    | 27.48631 | 1  | K <sub>app,ml</sub> |
| NTPP7    | 5.451964 | 1  | K <sub>app,ml</sub> |
| OP4ENH   | 4.119825 | 1  | K <sub>app,ml</sub> |
| HOPNTAL  | 3.265266 | 1  | K <sub>app,ml</sub> |
| NTPP8    | 8.705841 | 1  | K <sub>app,ml</sub> |
| 3HPPPNH  | 2.676857 | 1  | K <sub>app,ml</sub> |
| PPCSCT   | 18.76042 | 1  | K <sub>app,ml</sub> |
| AKGDH    | 40.88314 | 1  | K <sub>app,ml</sub> |
| HPYRRx   | 0.352116 | 1  | K <sub>app,ml</sub> |
| GLYCDx   | 4.506491 | 1  | K <sub>app,ml</sub> |
| DCYTD    | 3.76805  | 1  | K <sub>app,ml</sub> |
| AMANK    | 3.752667 | 1  | K <sub>app,ml</sub> |

|           |          |    |                     |
|-----------|----------|----|---------------------|
| UAGAAT    | 2.99576  | -1 | K <sub>app,ml</sub> |
| GART      | 6.381109 | 1  | K <sub>app,ml</sub> |
| PRPPS     | 16.77529 | -1 | K <sub>app,ml</sub> |
| H2SO      | 3.487541 | 1  | K <sub>app,ml</sub> |
| PRMICI    | 3.676523 | -1 | K <sub>app,ml</sub> |
| GMPR      | 2.610772 | 1  | K <sub>app,ml</sub> |
| ASPK      | 3.322316 | -1 | K <sub>app,ml</sub> |
| NTRIR2x   | 3.284036 | 1  | K <sub>app,ml</sub> |
| GARFT     | 13.45849 | -1 | K <sub>app,ml</sub> |
| PHETA1    | 4.269688 | 1  | K <sub>app,ml</sub> |
| PHETA1    | 11.59656 | -1 | K <sub>app,ml</sub> |
| ASCBPL    | 6.13234  | 1  | K <sub>app,ml</sub> |
| ADOCBLS   | 4.193462 | 1  | K <sub>app,ml</sub> |
| ADOCBIK   | 2.721728 | 1  | K <sub>app,ml</sub> |
| MCITL2    | 3.450673 | 1  | K <sub>app,ml</sub> |
| MCITL2    | 3.298899 | -1 | K <sub>app,ml</sub> |
| DXYLK     | 2.892534 | 1  | K <sub>app,ml</sub> |
| MDH3      | 1.502434 | 1  | K <sub>app,ml</sub> |
| SOTA      | 3.569773 | 1  | K <sub>app,ml</sub> |
| DHCINDO   | 3.193946 | 1  | K <sub>app,ml</sub> |
| SGSAD     | 2.418219 | 1  | K <sub>app,ml</sub> |
| HKND DH   | 10.07529 | 1  | K <sub>app,ml</sub> |
| HKNTDH    | 9.829484 | 1  | K <sub>app,ml</sub> |
| PTA2      | 1.524221 | 1  | K <sub>app,ml</sub> |
| MDH2      | 15.33422 | 1  | K <sub>app,ml</sub> |
| ACOTA     | 6.936054 | -1 | K <sub>app,ml</sub> |
| GPDDA5    | 13.05643 | 1  | K <sub>app,ml</sub> |
| PDX5PS    | 0.091514 | 1  | K <sub>app,ml</sub> |
| ENTCS     | 1.514259 | 1  | K <sub>app,ml</sub> |
| SULR      | 4.395033 | 1  | K <sub>app,ml</sub> |
| MANPGH    | 5.755779 | 1  | K <sub>app,ml</sub> |
| URDGLYCD  | 3.287935 | 1  | K <sub>app,ml</sub> |
| CBMKr     | 12.49795 | 1  | K <sub>app,ml</sub> |
| CBMKr     | 4.845883 | -1 | K <sub>app,ml</sub> |
| PRAGSr    | 4.628824 | -1 | K <sub>app,ml</sub> |
| AMANAPEr  | 4.245241 | 1  | K <sub>app,ml</sub> |
| AMANAPEr  | 4.245241 | -1 | K <sub>app,ml</sub> |
| ACM6PH    | 2.703964 | 1  | K <sub>app,ml</sub> |
| NNATr     | 3.476746 | -1 | K <sub>app,ml</sub> |
| MAN1PT2   | 4.021793 | 1  | K <sub>app,ml</sub> |
| AP5AH     | 11.17604 | 1  | K <sub>app,ml</sub> |
| GAPD      | 31.49729 | -1 | K <sub>app,ml</sub> |
| MCITS     | 2.829793 | 1  | K <sub>app,ml</sub> |
| DM_amob_c | 1.484089 | 1  | K <sub>app,ml</sub> |
| PPM2      | 2.709613 | -1 | K <sub>app,ml</sub> |
| G6PDH2r   | 7.322026 | -1 | K <sub>app,ml</sub> |
| ARGSL     | 5.957479 | -1 | K <sub>app,ml</sub> |
| NADH5     | 2.403306 | 1  | K <sub>app,ml</sub> |
| MLTG2     | 5.614094 | 1  | K <sub>app,ml</sub> |
| MLTP3     | 2.619613 | 1  | K <sub>app,ml</sub> |
| MLTP3     | 1.569838 | -1 | K <sub>app,ml</sub> |
| SPODM     | 1.887779 | 1  | K <sub>app,ml</sub> |
| TMK       | 3.529747 | 1  | K <sub>app,ml</sub> |
| NTPP4     | 14.51541 | 1  | K <sub>app,ml</sub> |
| GMPS      | 6.336127 | 1  | K <sub>app,ml</sub> |
| CAT       | 4.358878 | 1  | K <sub>app,ml</sub> |
| SERASr    | 2.660067 | -1 | K <sub>app,ml</sub> |
| PPPND0    | 2.766831 | 1  | K <sub>app,ml</sub> |
| UACMAMO   | 2.462367 | 1  | K <sub>app,ml</sub> |
| FBA3      | 6.447201 | -1 | K <sub>app,ml</sub> |
| LCADi     | 2.385278 | 1  | K <sub>app,ml</sub> |
| ACACT7r   | 9.086134 | 1  | K <sub>app,ml</sub> |
| ACACT7r   | 2.967914 | -1 | K <sub>app,ml</sub> |
| ADK3      | 4.014544 | -1 | K <sub>app,ml</sub> |
| ACACT2r   | 10.82815 | 1  | K <sub>app,ml</sub> |
| ACACT2r   | 3.631752 | -1 | K <sub>app,ml</sub> |
| BSORy     | 2.362444 | 1  | K <sub>app,ml</sub> |
| DMSOR2    | 2.26961  | 1  | K <sub>app,ml</sub> |
| ACACT3r   | 8.939981 | 1  | K <sub>app,ml</sub> |
| ACACT3r   | 2.697898 | -1 | K <sub>app,ml</sub> |
| ACACT4r   | 11.08831 | 1  | K <sub>app,ml</sub> |
| ACACT4r   | 3.64321  | -1 | K <sub>app,ml</sub> |
| HSDy      | 10.56054 | -1 | K <sub>app,ml</sub> |
| ACMAMUT   | 3.365882 | 1  | K <sub>app,ml</sub> |
| SSALy     | 12.18545 | 1  | K <sub>app,ml</sub> |
| DDGALK    | 3.806318 | 1  | K <sub>app,ml</sub> |

|            |          |    |                     |
|------------|----------|----|---------------------|
| AB6PGH     | 3.909703 | 1  | K <sub>app,ml</sub> |
| AHGDx      | 4.427314 | 1  | K <sub>app,ml</sub> |
| AHGDx      | 2.770437 | -1 | K <sub>app,ml</sub> |
| 3HCINNMH   | 2.676857 | 1  | K <sub>app,ml</sub> |
| BSORx      | 2.895214 | 1  | K <sub>app,ml</sub> |
| GP4GH      | 12.84317 | 1  | K <sub>app,ml</sub> |
| AADDGT     | 3.399368 | 1  | K <sub>app,ml</sub> |
| SPODMpp    | 3.15388  | 1  | K <sub>app,ml</sub> |
| PHYTSpp    | 12.8032  | 1  | K <sub>app,ml</sub> |
| PPTHpp     | 4.950185 | 1  | K <sub>app,ml</sub> |
| THD2pp     | 3.840832 | 1  | K <sub>app,ml</sub> |
| TMAOR2pp   | 2.447084 | 1  | K <sub>app,ml</sub> |
| FDMO       | 2.330453 | 1  | K <sub>app,ml</sub> |
| CHOLD      | 3.420031 | 1  | K <sub>app,ml</sub> |
| TKT2       | 3.049336 | -1 | K <sub>app,ml</sub> |
| CYTK1      | 4.524805 | -1 | K <sub>app,ml</sub> |
| DMSOR1pp   | 2.464278 | 1  | K <sub>app,ml</sub> |
| CYTK2      | 3.25772  | -1 | K <sub>app,ml</sub> |
| ECOAH8     | 1.932477 | 1  | K <sub>app,ml</sub> |
| ECOAH8     | 2.418335 | -1 | K <sub>app,ml</sub> |
| GLCDpp     | 4.155313 | 1  | K <sub>app,ml</sub> |
| HYD2pp     | 2.435902 | 1  | K <sub>app,ml</sub> |
| GK1        | 5.679219 | -1 | K <sub>app,ml</sub> |
| HACD1      | 3.683205 | 1  | K <sub>app,ml</sub> |
| HACD1      | 2.561001 | -1 | K <sub>app,ml</sub> |
| HACD2      | 3.581255 | 1  | K <sub>app,ml</sub> |
| HACD2      | 2.501425 | -1 | K <sub>app,ml</sub> |
| ECOAH5     | 5.841235 | 1  | K <sub>app,ml</sub> |
| ECOAH5     | 3.218489 | -1 | K <sub>app,ml</sub> |
| CYTDpp     | 2.540151 | 1  | K <sub>app,ml</sub> |
| CYTD2pp    | 3.52715  | 1  | K <sub>app,ml</sub> |
| ASPO3      | 1.043996 | 1  | K <sub>app,ml</sub> |
| GLYOX3     | 8.840878 | 1  | K <sub>app,ml</sub> |
| FDMO3      | 2.330453 | 1  | K <sub>app,ml</sub> |
| O16GLCT1   | 3.027211 | 1  | K <sub>app,ml</sub> |
| O16AP2pp   | 2.563836 | 1  | K <sub>app,ml</sub> |
| O16AP3pp   | 2.563836 | 1  | K <sub>app,ml</sub> |
| ACACT5r    | 8.939981 | 1  | K <sub>app,ml</sub> |
| ACACT5r    | 2.697898 | -1 | K <sub>app,ml</sub> |
| O16A4Lpp   | 3.819881 | 1  | K <sub>app,ml</sub> |
| MALTATr    | 3.703914 | 1  | K <sub>app,ml</sub> |
| MALTATr    | 3.703914 | -1 | K <sub>app,ml</sub> |
| DHBSH      | 7.098512 | 1  | K <sub>app,ml</sub> |
| MALDDH     | 2.52877  | 1  | K <sub>app,ml</sub> |
| ENTERES    | 17.49672 | 1  | K <sub>app,ml</sub> |
| TRSARr     | 4.313351 | 1  | K <sub>app,ml</sub> |
| TRSARr     | 34.25961 | -1 | K <sub>app,ml</sub> |
| MTHFC      | 10.24086 | -1 | K <sub>app,ml</sub> |
| MTHFD      | 8.114772 | -1 | K <sub>app,ml</sub> |
| LYXI       | 2.791214 | 1  | K <sub>app,ml</sub> |
| LADGMDH    | 7.882974 | 1  | K <sub>app,ml</sub> |
| ALKP       | 4.550678 | 1  | K <sub>app,ml</sub> |
| ALAGLUE    | 2.794805 | 1  | K <sub>app,ml</sub> |
| ALAGLUE    | 2.794805 | -1 | K <sub>app,ml</sub> |
| FE3HOXR2   | 3.487541 | 1  | K <sub>app,ml</sub> |
| ACACT6r    | 9.712107 | 1  | K <sub>app,ml</sub> |
| ACACT6r    | 3.645638 | -1 | K <sub>app,ml</sub> |
| GGGABAH    | 4.619979 | 1  | K <sub>app,ml</sub> |
| FRULYSK    | 3.417939 | 1  | K <sub>app,ml</sub> |
| FDMO6      | 2.330453 | 1  | K <sub>app,ml</sub> |
| LIPAbcpp   | 2.50442  | 1  | K <sub>app,ml</sub> |
| LIPACabcpp | 2.50442  | 1  | K <sub>app,ml</sub> |
| ECAP1pp    | 2.797934 | 1  | K <sub>app,ml</sub> |
| GGGABADr   | 2.886939 | 1  | K <sub>app,ml</sub> |
| GGGABADr   | 2.285701 | -1 | K <sub>app,ml</sub> |
| ECAP2pp    | 2.546605 | 1  | K <sub>app,ml</sub> |
| ECA4OALpp  | 3.819881 | 1  | K <sub>app,ml</sub> |
| FE3Ri      | 2.640478 | 1  | K <sub>app,ml</sub> |
| FE3HOXR3   | 3.487541 | 1  | K <sub>app,ml</sub> |
| FEENTERR1  | 3.487541 | 1  | K <sub>app,ml</sub> |
| FEENTERR3  | 3.487541 | 1  | K <sub>app,ml</sub> |
| LA4NTpp    | 2.785555 | 1  | K <sub>app,ml</sub> |
| AGM4PA     | 3.051655 | 1  | K <sub>app,ml</sub> |
| RNDR4b     | 0.078608 | 1  | K <sub>app,ml</sub> |
| UDPGALPpp  | 5.821825 | 1  | K <sub>app,ml</sub> |
| UACGAMPpp  | 5.821825 | 1  | K <sub>app,ml</sub> |

|            |          |    |                     |
|------------|----------|----|---------------------|
| UACGALPpp  | 5.821825 | 1  | k <sub>app,ml</sub> |
| UGLCURPpp  | 5.821825 | 1  | k <sub>app,ml</sub> |
| GUR1PPpp   | 7.098512 | 1  | k <sub>app,ml</sub> |
| ACGAL1Ppp  | 21.87028 | 1  | k <sub>app,ml</sub> |
| AM4PCP     | 3.733613 | 1  | k <sub>app,ml</sub> |
| AM3PA      | 3.051655 | 1  | k <sub>app,ml</sub> |
| UM4PCP     | 3.733613 | 1  | k <sub>app,ml</sub> |
| CBLAT      | 3.411688 | -1 | k <sub>app,ml</sub> |
| NTRIR4pp   | 2.517789 | 1  | k <sub>app,ml</sub> |
| NTRIR3pp   | 2.517789 | 1  | k <sub>app,ml</sub> |
| AGM3PA     | 3.051655 | 1  | k <sub>app,ml</sub> |
| ACANTHAT   | 3.407813 | 1  | k <sub>app,ml</sub> |
| FECRMR1    | 3.487541 | 1  | k <sub>app,ml</sub> |
| FECRMR2    | 3.487541 | 1  | k <sub>app,ml</sub> |
| TDP        | 4.813343 | 1  | k <sub>app,ml</sub> |
| 3PEPTabcpp | 2.526631 | 1  | k <sub>app,ml</sub> |
| 4PEPTabcpp | 2.525389 | 1  | k <sub>app,ml</sub> |
| AGM3Pt2pp  | 3.755548 | 1  | k <sub>app,ml</sub> |
| AGM4Pt2pp  | 3.755548 | 1  | k <sub>app,ml</sub> |
| AGMt2pp    | 3.755548 | 1  | k <sub>app,ml</sub> |
| ARBTNR1    | 3.487541 | 1  | k <sub>app,ml</sub> |
| ARBTNR2    | 3.487541 | 1  | k <sub>app,ml</sub> |
| METSXR1    | 2.295099 | 1  | k <sub>app,ml</sub> |
| METSXR2    | 5.168006 | 1  | k <sub>app,ml</sub> |
| DAPAL      | 3.73781  | 1  | k <sub>app,ml</sub> |
| AMPTASECG  | 11.68583 | 1  | k <sub>app,ml</sub> |
| ARBTNR3    | 3.487541 | 1  | k <sub>app,ml</sub> |
| FEOXAMR1   | 3.847276 | 1  | k <sub>app,ml</sub> |
| FEOXAMR2   | 3.847276 | 1  | k <sub>app,ml</sub> |
| FEOXAMR3   | 3.847276 | 1  | k <sub>app,ml</sub> |
| PTHRpp     | 4.226436 | 1  | k <sub>app,ml</sub> |
| FEENTERR2  | 3.487541 | 1  | k <sub>app,ml</sub> |
| FE3HOXR1   | 3.487541 | 1  | k <sub>app,ml</sub> |
| FECRMR3    | 3.487541 | 1  | k <sub>app,ml</sub> |
| FDMO2      | 2.330453 | 1  | k <sub>app,ml</sub> |
| LALGP      | 3.67872  | 1  | k <sub>app,ml</sub> |
| AGM4PApp   | 3.143364 | 1  | k <sub>app,ml</sub> |
| ARABDI     | 2.646269 | 1  | k <sub>app,ml</sub> |
| ARABDI     | 2.646269 | -1 | k <sub>app,ml</sub> |
| R5PPpp     | 4.226436 | 1  | k <sub>app,ml</sub> |
| R1PK       | 12.56464 | 1  | k <sub>app,ml</sub> |
| GRXR       | 6.532341 | 1  | k <sub>app,ml</sub> |
| RNDR1b     | 0.292833 | 1  | k <sub>app,ml</sub> |
| R15BPK     | 12.72596 | 1  | k <sub>app,ml</sub> |
| RNDR2b     | 0.890565 | 1  | k <sub>app,ml</sub> |
| FACOA181   | 8.936187 | 1  | k <sub>app,ml</sub> |
| FACOA160   | 11.48934 | 1  | k <sub>app,ml</sub> |
| FACOA140   | 3.671227 | 1  | k <sub>app,ml</sub> |
| CPGMR1     | 3.487541 | 1  | k <sub>app,ml</sub> |
| CPGMR2     | 3.487541 | 1  | k <sub>app,ml</sub> |
| CPGMR3     | 3.487541 | 1  | k <sub>app,ml</sub> |
| AAMYL      | 6.124081 | 1  | k <sub>app,ml</sub> |
| AAMYLpp    | 4.282791 | 1  | k <sub>app,ml</sub> |
| GGPTRCS    | 2.435125 | 1  | k <sub>app,ml</sub> |
| 23PDE2pp   | 3.540425 | 1  | k <sub>app,ml</sub> |
| 23PDE4pp   | 3.540425 | 1  | k <sub>app,ml</sub> |
| MN6PP      | 4.896934 | 1  | k <sub>app,ml</sub> |
| 3KGK       | 2.823988 | 1  | k <sub>app,ml</sub> |
| F6PP       | 4.692017 | 1  | k <sub>app,ml</sub> |
| FRULYSDG   | 10.78971 | 1  | k <sub>app,ml</sub> |
| FRULYSDG   | 3.768395 | -1 | k <sub>app,ml</sub> |
| GDPMNH     | 3.105539 | 1  | k <sub>app,ml</sub> |
| GDPDPK     | 2.457914 | 1  | k <sub>app,ml</sub> |
| DNTPPA     | 1.573331 | 1  | k <sub>app,ml</sub> |
| NTPP11     | 4.533803 | 1  | k <sub>app,ml</sub> |
| ALLPI      | 4.119161 | 1  | k <sub>app,ml</sub> |
| ALLPI      | 4.119161 | -1 | k <sub>app,ml</sub> |
| ALLK       | 3.550841 | 1  | k <sub>app,ml</sub> |
| ALLLULPE   | 4.154883 | 1  | k <sub>app,ml</sub> |
| ALLLULPE   | 3.402488 | -1 | k <sub>app,ml</sub> |
| NADPHQR2   | 3.564066 | 1  | k <sub>app,ml</sub> |
| NADPHQR3   | 3.564066 | 1  | k <sub>app,ml</sub> |
| NADPHQR4   | 3.564066 | 1  | k <sub>app,ml</sub> |
| GLBRAN2    | 2.464644 | 1  | k <sub>app,ml</sub> |
| ASR        | 2.47837  | 1  | k <sub>app,ml</sub> |
| XTSNH      | 3.447988 | 1  | k <sub>app,ml</sub> |

|           |          |    |                     |
|-----------|----------|----|---------------------|
| ECAtp     | 9.168891 | 1  | k <sub>app,ml</sub> |
| O16AT     | 5.35852  | 1  | k <sub>app,ml</sub> |
| O16GALFT  | 3.460466 | 1  | k <sub>app,ml</sub> |
| O16GLCT2  | 3.487541 | 1  | k <sub>app,ml</sub> |
| O16AUNDtp | 8.982407 | 1  | k <sub>app,ml</sub> |
| O16AP1pp  | 2.867069 | 1  | k <sub>app,ml</sub> |
| AGM4PCP   | 3.733613 | 1  | k <sub>app,ml</sub> |
| 4PCP      | 3.733613 | 1  | k <sub>app,ml</sub> |
| 4PCPpp    | 3.280727 | 1  | k <sub>app,ml</sub> |
| FALDH2    | 2.672188 | -1 | k <sub>app,ml</sub> |
| CBIAT     | 3.411688 | -1 | k <sub>app,ml</sub> |
| PPK2      | 2.665989 | 1  | k <sub>app,ml</sub> |
| DHPTPE    | 5.442813 | 1  | k <sub>app,ml</sub> |
| DHPTPE    | 5.442813 | -1 | k <sub>app,ml</sub> |
| PPDOy     | 2.810607 | 1  | k <sub>app,ml</sub> |
| PPA2      | 1.569796 | 1  | k <sub>app,ml</sub> |
| GNK       | 26.65476 | 1  | k <sub>app,ml</sub> |
| 3NTD7pp   | 3.487722 | 1  | k <sub>app,ml</sub> |
| 3NTD4pp   | 3.80098  | 1  | k <sub>app,ml</sub> |
| RMK       | 2.881141 | 1  | k <sub>app,ml</sub> |
| FHL       | 2.524572 | 1  | k <sub>app,ml</sub> |
| HYPGE     | 21.87028 | 1  | k <sub>app,ml</sub> |
| NTPP5     | 15.04929 | 1  | k <sub>app,ml</sub> |
| ACONMT    | 3.880165 | 1  | k <sub>app,ml</sub> |
| NADPPPS   | 7.680184 | 1  | k <sub>app,ml</sub> |
| THRD_L    | 27.91808 | 1  | k <sub>app,ml</sub> |
| NAMNPP    | 2.633579 | 1  | k <sub>app,ml</sub> |
| SELNPS    | 5.118439 | 1  | k <sub>app,ml</sub> |
| MTRPOX    | 2.482688 | 1  | k <sub>app,ml</sub> |
| AGM4PCPpp | 3.280727 | 1  | k <sub>app,ml</sub> |
| CRNCAR    | 8.097315 | 1  | k <sub>app,ml</sub> |
| CRNCAR    | 8.097315 | -1 | k <sub>app,ml</sub> |
| RNDR2     | 1.810068 | 1  | k <sub>app,ml</sub> |
| ANHMK     | 3.539172 | 1  | k <sub>app,ml</sub> |
| DHFR      | 2.448391 | -1 | k <sub>app,ml</sub> |
| NMNN      | 11.29015 | 1  | k <sub>app,ml</sub> |
| XAND      | 2.26533  | 1  | k <sub>app,ml</sub> |
| HACD3     | 3.592268 | 1  | k <sub>app,ml</sub> |
| HACD3     | 2.493227 | -1 | k <sub>app,ml</sub> |
| NNDMBRT   | 4.321261 | 1  | k <sub>app,ml</sub> |
| THRA2     | 66.09963 | 1  | k <sub>app,ml</sub> |
| PPK       | 2.665989 | 1  | k <sub>app,ml</sub> |
| SADH      | 14.35947 | 1  | k <sub>app,ml</sub> |
| E4PD      | 0.038994 | -1 | k <sub>app,ml</sub> |
| IG3PS     | 5.01309  | 1  | k <sub>app,ml</sub> |
| PDH       | 71.8999  | 1  | k <sub>app,ml</sub> |
| DADK      | 4.360949 | 1  | k <sub>app,ml</sub> |
| DADK      | 2.375471 | -1 | k <sub>app,ml</sub> |
| HYD3pp    | 2.435902 | 1  | k <sub>app,ml</sub> |
| AACPS5    | 1.294524 | 1  | k <sub>app,ml</sub> |
| MLTG4     | 0.272841 | 1  | k <sub>app,ml</sub> |
| UDPGDC    | 5.371394 | 1  | k <sub>app,ml</sub> |
| AMAOTr    | 3.170838 | -1 | k <sub>app,ml</sub> |
| MMCD      | 4.067714 | 1  | k <sub>app,ml</sub> |
| UDPKAAT   | 3.291144 | 1  | k <sub>app,ml</sub> |
| UDPKAAT   | 3.65951  | -1 | k <sub>app,ml</sub> |
| ULA4NFT   | 3.740215 | 1  | k <sub>app,ml</sub> |
| DKGLCNR2x | 2.17844  | 1  | k <sub>app,ml</sub> |
| UPLA4FNT  | 4.922288 | 1  | k <sub>app,ml</sub> |
| UPLA4FNF  | 11.21595 | 1  | k <sub>app,ml</sub> |
| ULA4Ntpi  | 7.353592 | 1  | k <sub>app,ml</sub> |
| MCITD     | 3.417475 | 1  | k <sub>app,ml</sub> |
| GLCATr    | 3.703914 | 1  | k <sub>app,ml</sub> |
| GLCATr    | 3.703914 | -1 | k <sub>app,ml</sub> |
| ALR2      | 2.438322 | 1  | k <sub>app,ml</sub> |
| ALAALAR   | 2.462285 | -1 | k <sub>app,ml</sub> |
| HXAND     | 2.26533  | 1  | k <sub>app,ml</sub> |
| G2PPpp    | 4.226436 | 1  | k <sub>app,ml</sub> |
| ALDD3y    | 2.909703 | 1  | k <sub>app,ml</sub> |
| R5PP      | 3.409544 | 1  | k <sub>app,ml</sub> |
| CYSSADS   | 2.872551 | 1  | k <sub>app,ml</sub> |
| CPPPGO2   | 2.407467 | 1  | k <sub>app,ml</sub> |
| AGM3PH    | 2.831628 | 1  | k <sub>app,ml</sub> |
| AGM3PApp  | 3.143364 | 1  | k <sub>app,ml</sub> |
| LALDO3    | 2.75933  | 1  | k <sub>app,ml</sub> |
| NTP10     | 12.81817 | 1  | k <sub>app,ml</sub> |

|              |          |    |          |
|--------------|----------|----|----------|
| GDMANE       | 2.644533 | 1  | K_app,ml |
| LPLIPAL2ATG1 | 3.251202 | 1  | K_app,ml |
| PLIPA1E140pp | 2.514084 | 1  | K_app,ml |
| LPLIPAL2E140 | 3.055662 | 1  | K_app,ml |
| PLIPA1E160pp | 3.462475 | 1  | K_app,ml |
| GALKr        | 10.22032 | -1 | K_app,ml |
| PLIPA1E161pp | 2.514084 | 1  | K_app,ml |
| AACPS8       | 2.004406 | 1  | K_app,ml |
| AACPS9       | 0.00694  | 1  | K_app,ml |
| LPLIPAL2E180 | 3.055662 | 1  | K_app,ml |
| LPLIPAL2G161 | 3.055662 | 1  | K_app,ml |
| LPLIPAL2G181 | 3.055662 | 1  | K_app,ml |
| HXCT         | 2.752224 | 1  | K_app,ml |
| AACPS6       | 2.004406 | 1  | K_app,ml |
| 2AGPEAT160   | 2.044477 | 1  | K_app,ml |
| AACPS7       | 0.900429 | 1  | K_app,ml |
| DURADx       | 2.372947 | 1  | K_app,ml |
| DURADx       | 2.477274 | -1 | K_app,ml |
| ECOAH7       | 4.864677 | 1  | K_app,ml |
| ECOAH7       | 2.713135 | -1 | K_app,ml |
| GALCTND      | 3.347427 | 1  | K_app,ml |
| QMO2         | 1.483889 | 1  | K_app,ml |
| QMO3         | 1.896808 | 1  | K_app,ml |
| LPLIPAL2E141 | 3.055662 | 1  | K_app,ml |
| LPLIPAL2E161 | 3.055662 | 1  | K_app,ml |
| LDH_D        | 5.601872 | 1  | K_app,ml |
| LPLIPAL2E181 | 3.055662 | 1  | K_app,ml |
| YUMPS        | 3.840615 | 1  | K_app,ml |
| YUMPS        | 3.606845 | -1 | K_app,ml |
| LPLIPAL2G180 | 3.055662 | 1  | K_app,ml |
| LPLIPAL2G141 | 3.055662 | 1  | K_app,ml |
| IPDDI        | 0.577649 | -1 | K_app,ml |
| T2DECAI      | 2.653291 | -1 | K_app,ml |
| 2AGPGAT180   | 2.044477 | 1  | K_app,ml |
| 2AGPGAT181   | 2.044477 | 1  | K_app,ml |
| 2AGPEAT140   | 2.044477 | 1  | K_app,ml |
| 2AGPEAT120   | 2.044477 | 1  | K_app,ml |
| CDAPPA161    | 5.716151 | 1  | K_app,ml |
| 2AGPEAT161   | 2.044477 | 1  | K_app,ml |
| 2AGPEAT141   | 2.044477 | 1  | K_app,ml |
| 2AGPGAT160   | 2.044477 | 1  | K_app,ml |
| PGSA180      | 5.363519 | 1  | K_app,ml |
| PSSA140      | 2.765518 | 1  | K_app,ml |
| 2AGPGAT141   | 2.044477 | 1  | K_app,ml |
| FACOA180     | 7.34444  | 1  | K_app,ml |
| LPLIPAL2ATG1 | 3.251202 | 1  | K_app,ml |
| LPLIPAL2ATG1 | 3.251202 | 1  | K_app,ml |
| LPLIPAL2ATG1 | 3.251202 | 1  | K_app,ml |
| LPLIPAL2ATG1 | 3.251202 | 1  | K_app,ml |
| LPLIPAL2ATG1 | 3.251202 | 1  | K_app,ml |
| LPLIPAL2ATG1 | 3.251202 | 1  | K_app,ml |
| FACOA100     | 7.34444  | 1  | K_app,ml |
| FACOA180     | 0.001362 | 1  | K_app,ml |
| FACOA160     | 7.34444  | 1  | K_app,ml |
| CLPNS180pp   | 3.757662 | 1  | K_app,ml |
| CLPNS180pp   | 2.569282 | -1 | K_app,ml |
| PLIPA1E120pp | 2.514084 | 1  | K_app,ml |
| CLPNS181pp   | 0.194469 | 1  | K_app,ml |
| CLPNS181pp   | 2.569282 | -1 | K_app,ml |
| PLIPA1G120pp | 2.514084 | 1  | K_app,ml |
| FACOA141     | 7.34444  | 1  | K_app,ml |
| CLPNS120pp   | 3.757662 | 1  | K_app,ml |
| CLPNS120pp   | 2.569282 | -1 | K_app,ml |
| ALPATE160pp  | 2.404651 | 1  | K_app,ml |
| FACOA161     | 10.52334 | 1  | K_app,ml |
| ALPATG160pp  | 2.404651 | 1  | K_app,ml |
| 2AGPGAT120   | 2.044477 | 1  | K_app,ml |
| LPLIPAL2ATE1 | 3.251202 | 1  | K_app,ml |
| ALAALAD      | 3.76856  | 1  | K_app,ml |
| 2AGPEAT180   | 2.044477 | 1  | K_app,ml |
| LPLIPAL2ATE1 | 3.251202 | 1  | K_app,ml |
| LPLIPAL2ATE1 | 3.251202 | 1  | K_app,ml |
| LPLIPAL2ATE1 | 3.251202 | 1  | K_app,ml |
| LPLIPAL2ATE1 | 3.251202 | 1  | K_app,ml |
| 2AGPEAT181   | 2.044477 | 1  | K_app,ml |
| 2AGPGAT140   | 2.044477 | 1  | K_app,ml |

|              |          |    |          |
|--------------|----------|----|----------|
| PLIPA1E181pp | 2.514084 | 1  | K_app,ml |
| PLIPA1G180pp | 2.514084 | 1  | K_app,ml |
| LPLIPAL2ATE1 | 3.251202 | 1  | K_app,ml |
| LPLIPAL2ATE1 | 3.251202 | 1  | K_app,ml |
| PLIPA1G181pp | 2.514084 | 1  | K_app,ml |
| 2AGPGAT16l   | 2.044477 | 1  | K_app,ml |
| AMPTASEPG    | 11.68583 | 1  | K_app,ml |
| ADSL1r       | 3.15405  | -1 | K_app,ml |
| PGPP140pp    | 4.251784 | 1  | K_app,ml |
| PGPP141pp    | 4.251784 | 1  | K_app,ml |
| PGPP160pp    | 4.251784 | 1  | K_app,ml |
| PGPP180pp    | 4.251784 | 1  | K_app,ml |
| CLPNH141pp   | 7.098512 | 1  | K_app,ml |
| CLPNH160pp   | 7.098512 | 1  | K_app,ml |
| CLPNH161pp   | 7.098512 | 1  | K_app,ml |
| AICART       | 3.406534 | -1 | K_app,ml |
| CLPNH181pp   | 7.098512 | 1  | K_app,ml |
| PLIPA1E180pp | 3.462475 | 1  | K_app,ml |
| PLIPA1G140pp | 2.514084 | 1  | K_app,ml |
| PLIPA1G161pp | 2.514084 | 1  | K_app,ml |
| CLPNS160pp   | 0.389207 | 1  | K_app,ml |
| CLPNS160pp   | 2.569282 | -1 | K_app,ml |
| CLPNS161pp   | 0.326188 | 1  | K_app,ml |
| CLPNS161pp   | 2.569282 | -1 | K_app,ml |
| PAPA120pp    | 7.234931 | 1  | K_app,ml |
| PAPA140pp    | 7.234931 | 1  | K_app,ml |
| GGPTRCO      | 4.320293 | 1  | K_app,ml |
| PAPA141pp    | 7.234931 | 1  | K_app,ml |
| PAPA160pp    | 7.234931 | 1  | K_app,ml |
| PAPA161pp    | 7.234931 | 1  | K_app,ml |
| PAPA180pp    | 7.234931 | 1  | K_app,ml |
| HPYRI        | 4.277075 | 1  | K_app,ml |
| HPYRI        | 31.1465  | -1 | K_app,ml |
| HYD1pp       | 2.418675 | 1  | K_app,ml |
| AACTOOR      | 2.496258 | 1  | K_app,ml |
| ECAP3pp      | 2.546605 | 1  | K_app,ml |
| TPRDCOAS     | 7.748391 | 1  | K_app,ml |
| ACGAM1PPpp   | 21.87028 | 1  | K_app,ml |
| THIORDXi     | 5.927244 | 1  | K_app,ml |
| PDX5P02      | 1.510259 | 1  | K_app,ml |
| MDDCP1pp     | 1.353983 | 1  | K_app,ml |
| GUI2         | 2.725522 | 1  | K_app,ml |
| GUI2         | 2.725522 | -1 | K_app,ml |
| PLIPA1A181pp | 2.514084 | 1  | K_app,ml |
| PGM          | 65.56609 | 1  | K_app,ml |
| LPLIPAL2A141 | 2.809181 | 1  | K_app,ml |
| MLTG5        | 0.272841 | 1  | K_app,ml |
| G3PAT141     | 2.571933 | 1  | K_app,ml |
| 2DOXG6PP     | 4.038472 | 1  | K_app,ml |
| OXAMTC       | 3.487541 | 1  | K_app,ml |
| UDCPTppi     | 7.098512 | 1  | K_app,ml |
| AGMH         | 2.831628 | 1  | K_app,ml |
| G3PAT181     | 2.180277 | 1  | K_app,ml |
| MPTG         | 1.881249 | 1  | K_app,ml |
| MPTG2        | 0.156749 | 1  | K_app,ml |
| MCTP1AApp    | 1.791982 | 1  | K_app,ml |
| MCTP2AApp    | 0.216502 | 1  | K_app,ml |
| CDAPPA160    | 5.716151 | 1  | K_app,ml |
| CDAPPA141    | 5.716151 | 1  | K_app,ml |
| MCTP1Bpp     | 0.320418 | 1  | K_app,ml |
| PERD         | 0.078893 | -1 | K_app,ml |
| PGSA141      | 5.363519 | 1  | K_app,ml |
| DM_sdrib_c   | 1.525218 | 1  | K_app,ml |
| 3OAR120      | 3.967411 | -1 | K_app,ml |
| 3HAD80       | 2.407494 | 1  | K_app,ml |
| 3HAD120      | 2.407494 | 1  | K_app,ml |
| DSBGGT       | 3.246589 | 1  | K_app,ml |
| EAR180x      | 2.290886 | 1  | K_app,ml |
| AGPAT120     | 6.658908 | 1  | K_app,ml |
| AMPMS2       | 1.542061 | 1  | K_app,ml |
| DM_oxam_c    | 7.098512 | 1  | K_app,ml |
| ALR4x        | 2.499005 | 1  | K_app,ml |
| PGPP120      | 4.251784 | 1  | K_app,ml |
| DAGK120      | 5.427744 | 1  | K_app,ml |
| PSSA180      | 2.765518 | 1  | K_app,ml |
| PSSA141      | 2.765518 | 1  | K_app,ml |



|              |          |    |          |
|--------------|----------|----|----------|
| PSD180       | 3.061142 | 1  | K app,ml |
| LPLIPAL1G141 | 3.324473 | 1  | K app,ml |
| LPLIPAL1G180 | 3.171706 | 1  | K app,ml |
| LPLIPAL1G181 | 3.324473 | 1  | K app,ml |
| ACONTb       | 14.12519 | -1 | K app,ml |
| PLIPA2A140pp | 3.462475 | 1  | K app,ml |
| PLIPA2A141pp | 3.462475 | 1  | K app,ml |
| PLIPA2A180pp | 3.462475 | 1  | K app,ml |
| PLIPA2E141pp | 2.514084 | 1  | K app,ml |
| PLIPA2E181pp | 2.514084 | 1  | K app,ml |
| PLIPA2G140pp | 2.514084 | 1  | K app,ml |
| 3HAD161      | 2.407494 | 1  | K app,ml |
| PLIPA2G160pp | 2.514084 | 1  | K app,ml |
| CU1Opp       | 2.852558 | 1  | K app,ml |
| PLIPA2G181pp | 2.514084 | 1  | K app,ml |
| FADRx2       | 13.29396 | 1  | K app,ml |
| LPLIPAL1E141 | 3.324473 | 1  | K app,ml |
| LPLIPAL1E160 | 3.324473 | 1  | K app,ml |
| LPLIPAL1E180 | 3.324473 | 1  | K app,ml |
| 3HAD121      | 2.407494 | 1  | K app,ml |
| LPLIPAL1E181 | 3.324473 | 1  | K app,ml |
| LPLIPAL1G160 | 3.324473 | 1  | K app,ml |
| LPLIPAL1G161 | 3.324473 | 1  | K app,ml |
| GTHRDHpp     | 2.907945 | 1  | K app,ml |
| MDDCP2pp     | 0.082167 | 1  | K app,ml |
| LPLIPAL1G120 | 3.324473 | 1  | K app,ml |
| PLIPA2E140pp | 2.514084 | 1  | K app,ml |
| PLIPA2E160pp | 2.514084 | 1  | K app,ml |
| PLIPA2A161pp | 2.514084 | 1  | K app,ml |
| PLIPA2A181pp | 2.514084 | 1  | K app,ml |
| MDDCP3pp     | 0.235402 | 1  | K app,ml |
| G3PAT140     | 2.571933 | 1  | K app,ml |
| G3PAT160     | 2.853299 | 1  | K app,ml |
| G3PAT161     | 2.619723 | 1  | K app,ml |
| AGPAT140     | 6.658908 | 1  | K app,ml |
| MLDCP2Bpp    | 3.160439 | 1  | K app,ml |
| 3OAR140      | 3.967411 | -1 | K app,ml |
| CDAPPA140    | 5.716151 | 1  | K app,ml |
| MLDCP1App    | 0.103874 | 1  | K app,ml |
| 3OAR160      | 3.967411 | -1 | K app,ml |
| 3HAD181      | 2.407494 | 1  | K app,ml |
| PGPP160      | 2.609757 | 1  | K app,ml |
| 3HAD141      | 2.407494 | 1  | K app,ml |
| PGPP180      | 4.251784 | 1  | K app,ml |
| PGPP161      | 2.603426 | 1  | K app,ml |
| PGPP181      | 1.266994 | 1  | K app,ml |
| PSD140       | 3.061142 | 1  | K app,ml |
| MICITDr      | 2.729069 | 1  | K app,ml |
| MICITDr      | 2.729069 | -1 | K app,ml |
| CDAPPA180    | 5.716151 | 1  | K app,ml |
| AGM4PH       | 2.831628 | 1  | K app,ml |
| NTP12        | 12.44237 | 1  | K app,ml |
| CDAPPA181    | 5.716151 | 1  | K app,ml |
| PGSA140      | 5.363519 | 1  | K app,ml |
| LPLIPAL1A141 | 3.324473 | 1  | K app,ml |
| LPLIPAL1A180 | 3.324473 | 1  | K app,ml |
| LPLIPAL1E140 | 3.324473 | 1  | K app,ml |
| LPLIPAL1E161 | 3.324473 | 1  | K app,ml |
| LPLIPAL1G140 | 3.324473 | 1  | K app,ml |
| PSD141       | 3.061142 | 1  | K app,ml |
| MLDCP2App    | 3.160439 | 1  | K app,ml |
| AM4PA        | 3.051655 | 1  | K app,ml |
| PGPP120pp    | 4.251784 | 1  | K app,ml |
| PGPP181pp    | 4.251784 | 1  | K app,ml |
| CLPNH120pp   | 7.098512 | 1  | K app,ml |
| PAPA181pp    | 7.234931 | 1  | K app,ml |
| CLPNH140pp   | 7.098512 | 1  | K app,ml |
| PGPP140      | 4.251784 | 1  | K app,ml |
| PGPP141      | 4.251784 | 1  | K app,ml |
| MDDCP5pp     | 3.133974 | 1  | K app,ml |
| MLTGY3pp     | 2.725129 | 1  | K app,ml |
| MDDCP4pp     | 0.532646 | 1  | K app,ml |
| CLPNS140pp   | 3.757662 | 1  | K app,ml |
| CLPNS140pp   | 2.569282 | -1 | K app,ml |
| CLPNS141pp   | 3.757662 | 1  | K app,ml |
| CLPNS141pp   | 2.569282 | -1 | K app,ml |

|              |          |    |                     |
|--------------|----------|----|---------------------|
| G3PAT180     | 2.571933 | 1  | K <sub>app,ml</sub> |
| PLIPA1G160pp | 2.514084 | 1  | K <sub>app,ml</sub> |
| PLIPA1G141pp | 2.514084 | 1  | K <sub>app,ml</sub> |
| LPLIPAL2E160 | 3.055662 | 1  | K <sub>app,ml</sub> |
| LPLIPAL2G140 | 3.055662 | 1  | K <sub>app,ml</sub> |
| LPLIPAL2G160 | 3.055662 | 1  | K <sub>app,ml</sub> |
| PAPA160      | 7.234931 | 1  | K <sub>app,ml</sub> |
| PAPA180      | 7.234931 | 1  | K <sub>app,ml</sub> |
| PAPA181      | 7.234931 | 1  | K <sub>app,ml</sub> |
| LPLIPAL2G120 | 3.055662 | 1  | K <sub>app,ml</sub> |
| PETNT161pp   | 2.758737 | 1  | K <sub>app,ml</sub> |
| DAGK141      | 5.427744 | 1  | K <sub>app,ml</sub> |
| DAGK161      | 5.427744 | 1  | K <sub>app,ml</sub> |
| PGPP161pp    | 4.251784 | 1  | K <sub>app,ml</sub> |
| MDDEP3pp     | 0.230219 | 1  | K <sub>app,ml</sub> |
| MDDEP4pp     | 3.244021 | 1  | K <sub>app,ml</sub> |
| PAPA140      | 7.234931 | 1  | K <sub>app,ml</sub> |
| MLTGY1pp     | 2.725129 | 1  | K <sub>app,ml</sub> |
| 3HAD40       | 2.407494 | 1  | K <sub>app,ml</sub> |
| PLIPA1E141pp | 2.514084 | 1  | K <sub>app,ml</sub> |
| PAPA141      | 7.234931 | 1  | K <sub>app,ml</sub> |
| PAPA161      | 7.234931 | 1  | K <sub>app,ml</sub> |
| DSBAO1       | 3.832589 | 1  | K <sub>app,ml</sub> |
| DSBAO2       | 3.832589 | 1  | K <sub>app,ml</sub> |
| DSBDR        | 2.587281 | 1  | K <sub>app,ml</sub> |
| PLIPA2A120pp | 3.462475 | 1  | K <sub>app,ml</sub> |
| PLIPA2A160pp | 3.462475 | 1  | K <sub>app,ml</sub> |
| CLPNH180pp   | 7.098512 | 1  | K <sub>app,ml</sub> |
| 3OAR60       | 3.967411 | -1 | K <sub>app,ml</sub> |
| 3OAR80       | 3.967411 | -1 | K <sub>app,ml</sub> |
| MLDCP3App    | 0.174891 | 1  | K <sub>app,ml</sub> |
| MLDCP1Bpp    | 3.160439 | 1  | K <sub>app,ml</sub> |
| LPLIPAL2E120 | 3.055662 | 1  | K <sub>app,ml</sub> |
| ATHRDHr      | 2.400645 | 1  | K <sub>app,ml</sub> |
| ATHRDHr      | 16.03101 | -1 | K <sub>app,ml</sub> |
| LSERDhr      | 2.452173 | -1 | K <sub>app,ml</sub> |
| 3OAR40       | 2.660884 | -1 | K <sub>app,ml</sub> |
| 3OAR100      | 3.967411 | -1 | K <sub>app,ml</sub> |
| DSERDhr      | 3.00543  | 1  | K <sub>app,ml</sub> |
| DSERDhr      | 4.674328 | -1 | K <sub>app,ml</sub> |
| 3HAD60       | 2.745113 | 1  | K <sub>app,ml</sub> |
| 3HAD100      | 2.407494 | 1  | K <sub>app,ml</sub> |
| 3HAD140      | 2.745113 | 1  | K <sub>app,ml</sub> |
| 3HAD160      | 2.745113 | 1  | K <sub>app,ml</sub> |
| PSD120       | 3.061142 | 1  | K <sub>app,ml</sub> |
| AGPAT180     | 6.658908 | 1  | K <sub>app,ml</sub> |
| AGPAT141     | 6.658908 | 1  | K <sub>app,ml</sub> |
| PAPA120      | 7.234931 | 1  | K <sub>app,ml</sub> |
| MDDEP1pp     | 0.192692 | 1  | K <sub>app,ml</sub> |
| MDDEP2pp     | 3.244021 | 1  | K <sub>app,ml</sub> |
| MLDEP1pp     | 1.717065 | 1  | K <sub>app,ml</sub> |
| DAGK180      | 5.427744 | 1  | K <sub>app,ml</sub> |
| MLDEP2pp     | 7.648413 | 1  | K <sub>app,ml</sub> |
| MLTGY2pp     | 2.725129 | 1  | K <sub>app,ml</sub> |
| PLIPA2E120pp | 2.514084 | 1  | K <sub>app,ml</sub> |
| PLIPA2G141pp | 2.514084 | 1  | K <sub>app,ml</sub> |
| MLTGY4pp     | 2.725129 | 1  | K <sub>app,ml</sub> |
| PLIPA2G161pp | 2.514084 | 1  | K <sub>app,ml</sub> |
| LPLIPAL1A120 | 3.324473 | 1  | K <sub>app,ml</sub> |
| LPLIPAL1A140 | 3.324473 | 1  | K <sub>app,ml</sub> |
| LPLIPAL1A181 | 3.324473 | 1  | K <sub>app,ml</sub> |
| LPLIPAL1E120 | 3.324473 | 1  | K <sub>app,ml</sub> |
| 3OAR180      | 2.660884 | -1 | K <sub>app,ml</sub> |
| G3PAT120     | 2.571933 | 1  | K <sub>app,ml</sub> |
| PGSA120      | 5.363519 | 1  | K <sub>app,ml</sub> |
| 3HAD180      | 2.407494 | 1  | K <sub>app,ml</sub> |
| CDAPPA120    | 5.716151 | 1  | K <sub>app,ml</sub> |
| OMMBLHX3     | 1.507884 | 1  | K <sub>app,ml</sub> |
| PSSA120      | 2.765518 | 1  | K <sub>app,ml</sub> |
| UM4PL        | 2.563139 | 1  | K <sub>app,ml</sub> |
| 2MAHMP       | 3.462365 | 1  | K <sub>app,ml</sub> |
| NADHPO       | 4.510757 | 1  | K <sub>app,ml</sub> |
| ACOAD7f      | 2.822655 | 1  | K <sub>app,ml</sub> |
| ACOAD7f      | 5.366348 | -1 | K <sub>app,ml</sub> |
| ACOAD8f      | 2.822655 | 1  | K <sub>app,ml</sub> |
| ACOAD8f      | 2.822655 | -1 | K <sub>app,ml</sub> |

|              |          |    |          |
|--------------|----------|----|----------|
| PLIPA1A120pp | 3.462475 | 1  | K_app,ml |
| ACOAD5f      | 3.666903 | 1  | K_app,ml |
| ACOAD5f      | 8.701169 | -1 | K_app,ml |
| PLIPA1A140pp | 3.462475 | 1  | K_app,ml |
| PLIPA1A141pp | 3.462475 | 1  | K_app,ml |
| PLIPA1A160pp | 3.462475 | 1  | K_app,ml |
| PLIPA1A161pp | 2.514084 | 1  | K_app,ml |
| PLIPA1A180pp | 3.462475 | 1  | K_app,ml |
| LPLIPAL2A120 | 2.809181 | 1  | K_app,ml |
| ACOAD3f      | 3.639979 | 1  | K_app,ml |
| ACOAD3f      | 8.652383 | -1 | K_app,ml |
| ACOAD2f      | 2.822655 | 1  | K_app,ml |
| ACOAD2f      | 7.085496 | -1 | K_app,ml |
| ACOAD4f      | 2.822655 | 1  | K_app,ml |
| ACOAD4f      | 7.085496 | -1 | K_app,ml |
| ACOAD6f      | 7.639588 | -1 | K_app,ml |
| KDUI         | 11.50452 | 1  | K_app,ml |
| CTBTCAL2     | 2.501161 | 1  | K_app,ml |
| OBTFL        | 2.620728 | 1  | K_app,ml |
| FA161ACPHi   | 55.65879 | 1  | K_app,ml |
| BGLA1        | 4.74562  | 1  | K_app,ml |
| FA141ACPHi   | 55.65879 | 1  | K_app,ml |
| FA160ACPHi   | 55.65879 | 1  | K_app,ml |
| GDPMNP       | 16.35714 | 1  | K_app,ml |
| OPHHX3       | 1.507884 | 1  | K_app,ml |
| FA120ACPHi   | 55.65879 | 1  | K_app,ml |
| FA80ACPHi    | 55.65879 | 1  | K_app,ml |
| FA140ACPHi   | 55.65879 | 1  | K_app,ml |
| FA100ACPHi   | 55.65879 | 1  | K_app,ml |
| CRNDAL2      | 2.501161 | 1  | K_app,ml |
| CRNCAL2      | 2.501161 | 1  | K_app,ml |
| PLIPA2E161pp | 2.514084 | 1  | K_app,ml |
| PLIPA2E180pp | 2.514084 | 1  | K_app,ml |
| FRULYSE      | 3.410595 | 1  | K_app,ml |
| FRULYSE      | 3.410595 | -1 | K_app,ml |
| PLIPA2G120pp | 2.514084 | 1  | K_app,ml |
| PLIPA2G180pp | 2.127453 | 1  | K_app,ml |
| LPLIPAL1A161 | 3.324473 | 1  | K_app,ml |
| LPLIPAL1A160 | 3.324473 | 1  | K_app,ml |
| LPLIPAL2A140 | 2.809181 | 1  | K_app,ml |
| LPLIPAL2A160 | 2.809181 | 1  | K_app,ml |
| LPLIPAL2A161 | 2.809181 | 1  | K_app,ml |
| LPLIPAL2A180 | 2.809181 | 1  | K_app,ml |
| LPLIPAL2A181 | 2.809181 | 1  | K_app,ml |
| DM_aacald_c  | 7.098512 | 1  | K_app,ml |
| UM3PL        | 2.563139 | 1  | K_app,ml |
| GALCTLO      | 2.881793 | 1  | K_app,ml |
| POR5         | 3.980006 | 1  | K_app,ml |
| POR5         | 6.197212 | -1 | K_app,ml |
| HACD8        | 11.80702 | 1  | K_app,ml |
| HACD8        | 8.339206 | -1 | K_app,ml |
| CTECOAI6     | 6.982129 | -1 | K_app,ml |
| SELGTHR      | 3.487541 | 1  | K_app,ml |
| SELGTHR3     | 2.723451 | 1  | K_app,ml |
| THRA         | 4.288814 | 1  | K_app,ml |
| DGUNC        | 3.786562 | 1  | K_app,ml |
| XYLK2        | 2.797534 | 1  | K_app,ml |
| GLDBRAN2     | 2.334182 | 1  | K_app,ml |
| S2FE2SR      | 2.15723  | 1  | K_app,ml |
| CDGUNPD      | 3.530083 | 1  | K_app,ml |
| ACACT8r      | 2.697898 | 1  | K_app,ml |
| ACACT8r      | 3.686624 | -1 | K_app,ml |
| CTECOAI7     | 6.982129 | 1  | K_app,ml |
| CTECOAI7     | 11.53259 | -1 | K_app,ml |
| 3AMACHYD     | 33.13717 | 1  | K_app,ml |
| FDH4pp       | 25.79707 | 1  | K_app,ml |
| FDH5pp       | 0.00855  | 1  | K_app,ml |
| ACPPAT140    | 2.410531 | 1  | K_app,ml |
| APG3PAT140   | 4.890185 | 1  | K_app,ml |
| LDGUNPD      | 3.321879 | 1  | K_app,ml |
| APG3PAT141   | 4.890185 | 1  | K_app,ml |
| MOADSUX      | 1.495763 | 1  | K_app,ml |
| APG3PAT181   | 3.416439 | 1  | K_app,ml |
| APH140       | 3.12568  | 1  | K_app,ml |
| APH160       | 3.12568  | 1  | K_app,ml |
| SCYSDS       | 3.198283 | 1  | K_app,ml |

|             |          |    |          |
|-------------|----------|----|----------|
| S2FE2SS     | 2.059549 | 1  | K_app,ml |
| S4FE4SR     | 2.467245 | 1  | K_app,ml |
| CCGS        | 2.838964 | 1  | K_app,ml |
| REPHACCOAI  | 4.078866 | 1  | K_app,ml |
| REPHACCOAI  | 4.078866 | -1 | K_app,ml |
| ACPPAT141   | 2.410531 | 1  | K_app,ml |
| ACPPAT161   | 2.087464 | 1  | K_app,ml |
| ACPPAT180   | 2.410531 | 1  | K_app,ml |
| APG3PAT160  | 4.541992 | 1  | K_app,ml |
| APG3PAT161  | 4.15706  | 1  | K_app,ml |
| APG3PAT180  | 4.890185 | 1  | K_app,ml |
| MECDPDH5    | 1.869982 | 1  | K_app,ml |
| CDGR        | 2.505639 | 1  | K_app,ml |
| RNTR1c2     | 2.218289 | 1  | K_app,ml |
| RNTR2c2     | 2.260405 | 1  | K_app,ml |
| S2FE2ST     | 2.68241  | 1  | K_app,ml |
| BWCOS       | 2.326042 | 1  | K_app,ml |
| RNTR3c2     | 1.99679  | 1  | K_app,ml |
| RNTR4c2     | 1.498421 | 1  | K_app,ml |
| BWCOGDS1    | 3.699292 | 1  | K_app,ml |
| BWCOGDS2    | 3.699292 | 1  | K_app,ml |
| CDGS        | 3.322615 | 1  | K_app,ml |
| DHNPTE      | 4.361322 | 1  | K_app,ml |
| DHNPTE      | 4.361322 | -1 | K_app,ml |
| DHMPTR      | 2.523332 | 1  | K_app,ml |
| I2FE2SS     | 1.504195 | 1  | K_app,ml |
| I2FE2ST     | 1.493889 | 1  | K_app,ml |
| OXCOAHDH    | 2.613249 | 1  | K_app,ml |
| DHACOAH     | 4.178044 | 1  | K_app,ml |
| DHACOAH     | 4.178044 | -1 | K_app,ml |
| I2FE2SS2    | 1.502792 | 1  | K_app,ml |
| MSAR        | 2.427211 | 1  | K_app,ml |
| I4FE4ST     | 1.517756 | 1  | K_app,ml |
| S4FE4ST     | 2.68241  | 1  | K_app,ml |
| FOMETRI     | 3.875567 | 1  | K_app,ml |
| S2FE2SS2    | 2.059549 | 1  | K_app,ml |
| SELGTHR2    | 2.723451 | 1  | K_app,ml |
| GDPTPDP     | 3.524073 | 1  | K_app,ml |
| COLIPAKpp   | 3.829001 | 1  | K_app,ml |
| ACPPAT120   | 2.410531 | 1  | K_app,ml |
| CPMPS       | 0.099392 | 1  | K_app,ml |
| LIPATPT     | 3.449978 | 1  | K_app,ml |
| LIPAMPL     | 2.586752 | 1  | K_app,ml |
| ALDD19xr    | 4.68611  | -1 | K_app,ml |
| MOGDS       | 1.489004 | 1  | K_app,ml |
| CPH4S       | 3.212318 | 1  | K_app,ml |
| WCOS        | 2.326042 | 1  | K_app,ml |
| SHCHCS3     | 1.552127 | 1  | K_app,ml |
| VPAMTr      | 4.407651 | 1  | K_app,ml |
| PYK4        | 1.48396  | 1  | K_app,ml |
| NADPHXD     | 2.314239 | 1  | K_app,ml |
| NADPHXE     | 3.527344 | 1  | K_app,ml |
| NADPHXE     | 3.527344 | -1 | K_app,ml |
| DM_4crsol_c | 1.524038 | 1  | K_app,ml |
| 3OXCOAT     | 3.170324 | 1  | K_app,ml |
| URACPAH     | 5.20523  | 1  | K_app,ml |
| FE3DHBZS3R  | 3.665524 | 1  | K_app,ml |
| DXYLTD      | 3.444396 | 1  | K_app,ml |
| DXYLTD      | 3.444396 | -1 | K_app,ml |
| 2DDARAA     | 3.116683 | 1  | K_app,ml |
| 2DDARAA     | 2.689897 | -1 | K_app,ml |
| 2DGULRGx    | 2.17844  | 1  | K_app,ml |
| 2DGULRGy    | 2.448182 | 1  | K_app,ml |
| AP4AS       | 2.655165 | 1  | K_app,ml |
| GNP         | 1.572874 | 1  | K_app,ml |
| ALLTAMH2    | 6.517188 | 1  | K_app,ml |
| UGCIAMH     | 10.07596 | 1  | K_app,ml |
| POAACR      | 2.992232 | 1  | K_app,ml |
| METGLCUR    | 3.104906 | 1  | K_app,ml |
| ACOAD1fr    | 9.260675 | 1  | K_app,ml |
| FEENTERES   | 7.485505 | 1  | K_app,ml |
| FEENTERR4   | 3.665524 | 1  | K_app,ml |
| ACPPAT160   | 2.23661  | 1  | K_app,ml |
| ALR2x       | 2.731465 | 1  | K_app,ml |
| OMPHHXy     | 1.508531 | 1  | K_app,ml |
| 13PPDH2     | 2.791839 | 1  | K_app,ml |

|            |          |    |          |
|------------|----------|----|----------|
| 13PPDH2    | 3.283804 | -1 | K_app,ml |
| APCS       | 2.507151 | 1  | K_app,ml |
| ACPPAT181  | 1.990575 | 1  | K_app,ml |
| SQVOSI     | 6.062962 | 1  | K_app,ml |
| 6D6SPA     | 9.53266  | 1  | K_app,ml |
| ThDPAT     | 3.651278 | 1  | K_app,ml |
| GHBDHx     | 2.477119 | 1  | K_app,ml |
| GHBDHx     | 2.757048 | -1 | K_app,ml |
| APPLDhr    | 2.499005 | 1  | K_app,ml |
| APPLDhr    | 2.827125 | -1 | K_app,ml |
| APH141     | 3.12568  | 1  | K_app,ml |
| AI2K       | 1.660644 | 1  | K_app,ml |
| G2PP       | 45.26527 | 1  | K_app,ml |
| APH161     | 3.12568  | 1  | K_app,ml |
| DHNPA2r    | 5.202772 | -1 | K_app,ml |
| SHGO       | 4.325558 | 1  | K_app,ml |
| ACOXT      | 5.120754 | 1  | K_app,ml |
| ACOXT      | 5.120754 | -1 | K_app,ml |
| 2HESR      | 3.911573 | 1  | K_app,ml |
| CHOLID     | 3.274975 | 1  | K_app,ml |
| NADHXD     | 2.317967 | 1  | K_app,ml |
| 4ABZGLUH   | 4.851053 | 1  | K_app,ml |
| 4ABZGLUH   | 2.580011 | -1 | K_app,ml |
| APH180     | 3.12568  | 1  | K_app,ml |
| NADHXE     | 3.527344 | 1  | K_app,ml |
| NADHXE     | 3.527344 | -1 | K_app,ml |
| PHDA       | 4.501681 | 1  | K_app,ml |
| TEO2M      | 3.591815 | 1  | K_app,ml |
| PACOAT     | 5.182569 | 1  | K_app,ml |
| PYK2       | 1.483969 | 1  | K_app,ml |
| PYK3       | 1.484309 | 1  | K_app,ml |
| APH181     | 3.12568  | 1  | K_app,ml |
| DHPTDNR    | 2.959104 | 1  | K_app,ml |
| DHPTDNRN   | 2.301584 | 1  | K_app,ml |
| PCNO       | 2.794064 | 1  | K_app,ml |
| PCNO       | 2.719302 | -1 | K_app,ml |
| PYK6       | 1.484091 | 1  | K_app,ml |
| HPACOAT    | 5.182569 | 1  | K_app,ml |
| DC6PDA     | 8.290936 | 1  | K_app,ml |
| 5DGLCNR    | 33.42809 | 1  | K_app,ml |
| PAI2I      | 1.941962 | 1  | K_app,ml |
| CURR       | 2.671109 | 1  | K_app,ml |
| LKDRA      | 3.122071 | 1  | K_app,ml |
| LKDRA      | 2.912668 | -1 | K_app,ml |
| METNA      | 3.817243 | 1  | K_app,ml |
| METNA      | 3.817243 | -1 | K_app,ml |
| SDKGR      | 32.2425  | 1  | K_app,ml |
| SDKGR      | 2.874367 | -1 | K_app,ml |
| XYHDL      | 2.822777 | 1  | K_app,ml |
| E4PP       | 3.4766   | 1  | K_app,ml |
| PUACGAMS   | 2.664868 | 1  | K_app,ml |
| PUACGAMS   | 3.220147 | -1 | K_app,ml |
| RUSPP      | 3.226787 | 1  | K_app,ml |
| 6D6SFK     | 3.439494 | 1  | K_app,ml |
| 3SLAR      | 2.702708 | 1  | K_app,ml |
| MOX        | 1.488573 | 1  | K_app,ml |
| ARHGDx     | 4.789896 | 1  | K_app,ml |
| ARHGDx     | 4.750349 | -1 | K_app,ml |
| CPL        | 11.76008 | 1  | K_app,ml |
| CYSTA      | 2.456687 | 1  | K_app,ml |
| FE3DCITR5  | 4.112798 | 1  | K_app,ml |
| 4HTHRA     | 8.34468  | 1  | K_app,ml |
| 4HTHRA     | 1.505022 | -1 | K_app,ml |
| I2FE2SR    | 1.485261 | 1  | K_app,ml |
| GAPP       | 12.69453 | 1  | K_app,ml |
| INOSTO     | 2.437373 | 1  | K_app,ml |
| INOSTO     | 2.866705 | -1 | K_app,ml |
| THZPSN3    | 0.037488 | 1  | K_app,ml |
| HPYRP      | 3.857914 | 1  | K_app,ml |
| PSURIK     | 3.356983 | 1  | K_app,ml |
| PAI2T      | 1.575669 | 1  | K_app,ml |
| APG3PAT120 | 4.890185 | 1  | K_app,ml |
| QUINDHyI   | 4.070744 | 1  | K_app,ml |
| DHCURR     | 2.671109 | 1  | K_app,ml |
| RHMND      | 4.664837 | 1  | K_app,ml |
| RHMND      | 4.664837 | -1 | K_app,ml |

|             |          |    |                     |
|-------------|----------|----|---------------------|
| 3HBZCT      | 3.283962 | 1  | k <sub>app,ml</sub> |
| CXSAMS      | 4.072984 | 1  | k <sub>app,ml</sub> |
| PNSPA       | 4.831707 | 1  | k <sub>app,ml</sub> |
| 4HTHRK      | 1.512763 | 1  | k <sub>app,ml</sub> |
| AMPNTAT     | 3.693533 | 1  | k <sub>app,ml</sub> |
| APH120      | 3.12568  | 1  | k <sub>app,ml</sub> |
| SQGH        | 2.964042 | 1  | k <sub>app,ml</sub> |
| QUINDH      | 3.095731 | 1  | k <sub>app,ml</sub> |
| PETNT181pp  | 2.758737 | 1  | k <sub>app,ml</sub> |
| ARMEPNS     | 2.604305 | 1  | k <sub>app,ml</sub> |
| LCARSyi     | 16.67119 | 1  | k <sub>app,ml</sub> |
| MOCD5       | 1.491555 | 1  | k <sub>app,ml</sub> |
| RPNTPH      | 6.806072 | 1  | k <sub>app,ml</sub> |
| PRCPD       | 8.589033 | 1  | k <sub>app,ml</sub> |
| UDPGPT      | 2.703733 | 1  | k <sub>app,ml</sub> |
| UDPGPT      | 2.703733 | -1 | k <sub>app,ml</sub> |
| OMMBLXy     | 2.28037  | 1  | k <sub>app,ml</sub> |
| OPHHXy      | 2.585025 | 1  | k <sub>app,ml</sub> |
| PROD3       | 2.562292 | 1  | k <sub>app,ml</sub> |
| F1PP        | 1.483336 | 1  | k <sub>app,ml</sub> |
| ACP1p       | 2.77876  | 1  | k <sub>app,ml</sub> |
| 3HPADHi     | 2.464206 | 1  | k <sub>app,ml</sub> |
| 2HPTCOAT    | 6.153794 | 1  | k <sub>app,ml</sub> |
| MC6PH       | 6.1778   | 1  | k <sub>app,ml</sub> |
| FORCT       | 3.793628 | 1  | k <sub>app,ml</sub> |
| FORCT       | 3.793628 | -1 | k <sub>app,ml</sub> |
| PACCOAE     | 2.314845 | 1  | k <sub>app,ml</sub> |
| OXDHCOAT    | 2.665219 | 1  | k <sub>app,ml</sub> |
| HADPCOADH3  | 2.508011 | 1  | k <sub>app,ml</sub> |
| HADPCOADH3  | 2.915597 | -1 | k <sub>app,ml</sub> |
| DM_mththf_c | 1.508031 | 1  | k <sub>app,ml</sub> |
| PYROX       | 2.79138  | 1  | k <sub>app,ml</sub> |
| BMOGDS1     | 3.699292 | 1  | k <sub>app,ml</sub> |
| MPTS        | 1.490435 | 1  | k <sub>app,ml</sub> |
| BMOGDS2     | 3.699292 | 1  | k <sub>app,ml</sub> |
| OCTNLL      | 1.483907 | 1  | k <sub>app,ml</sub> |
| XPPT        | 131      | 1  | k <sub>cat</sub>    |
| HXPRT       | 7.89946  | 1  | k <sub>cat</sub>    |
| SHK3Dr      | 31.35933 | 1  | k <sub>cat</sub>    |
| SHK3Dr      | 11445.67 | -1 | k <sub>cat</sub>    |
| DHORTS      | 40.62444 | 1  | k <sub>cat</sub>    |
| DURIPP      | 145      | -1 | k <sub>cat</sub>    |
| ACS         | 20.26667 | 1  | k <sub>cat</sub>    |
| MAN6PI      | 64.4952  | 1  | k <sub>cat</sub>    |
| PPA         | 108.0008 | 1  | k <sub>cat</sub>    |
| TRPAS2      | 42       | 1  | k <sub>cat</sub>    |
| PPCK        | 65       | 1  | k <sub>cat</sub>    |
| ME1         | 134.4    | 1  | k <sub>cat</sub>    |
| ALAR        | 27.6     | 1  | k <sub>cat</sub>    |
| ALAR        | 6        | -1 | k <sub>cat</sub>    |
| ALATA_L     | 17.1     | 1  | k <sub>cat</sub>    |
| XYLK        | 3427.5   | 1  | k <sub>cat</sub>    |
| RBK         | 10.5     | 1  | k <sub>cat</sub>    |
| PPM         | 173      | -1 | k <sub>cat</sub>    |
| ASPTA       | 82.47143 | 1  | k <sub>cat</sub>    |
| FBP         | 19.1     | 1  | k <sub>cat</sub>    |
| GLGC        | 370      | 1  | k <sub>cat</sub>    |
| PYK         | 135.6429 | 1  | k <sub>cat</sub>    |
| ASPISO      | 172      | 1  | k <sub>cat</sub>    |
| ASPISO      | 130      | -1 | k <sub>cat</sub>    |
| GTHOr       | 441.95   | 1  | k <sub>cat</sub>    |
| ILETA       | 48       | 1  | k <sub>cat</sub>    |
| DHORD5      | 49.64    | 1  | k <sub>cat</sub>    |
| VALTA       | 19       | 1  | k <sub>cat</sub>    |
| ORPT        | 1.95     | 1  | k <sub>cat</sub>    |
| TRPS2       | 4.45194  | 1  | k <sub>cat</sub>    |
| PSCVT       | 1.94667  | -1 | k <sub>cat</sub>    |
| PFL         | 12.8     | 1  | k <sub>cat</sub>    |
| ANS         | 64.03322 | 1  | k <sub>cat</sub>    |
| FRD2        | 79.6     | 1  | k <sub>cat</sub>    |
| FRD3        | 79.6     | 1  | k <sub>cat</sub>    |
| POX         | 167      | 1  | k <sub>cat</sub>    |
| CHORM       | 147457.6 | 1  | k <sub>cat</sub>    |
| PTAr        | 1341.326 | 1  | k <sub>cat</sub>    |
| PTAr        | 1419.466 | -1 | k <sub>cat</sub>    |
| ACKr        | 632.6667 | 1  | k <sub>cat</sub>    |

|         |          |    |                  |
|---------|----------|----|------------------|
| ACKr    | 942.75   | -1 | k <sub>cat</sub> |
| LEUTAi  | 290      | 1  | k <sub>cat</sub> |
| TMDPP   | 984      | 1  | k <sub>cat</sub> |
| FBA     | 10.85    | 1  | k <sub>cat</sub> |
| HCO3E   | 17000    | 1  | k <sub>cat</sub> |
| PP5     | 1160.137 | 1  | k <sub>cat</sub> |
| PGI     | 1340.56  | -1 | k <sub>cat</sub> |
| PGK     | 529.8    | 1  | k <sub>cat</sub> |
| EDA     | 72.15063 | 1  | k <sub>cat</sub> |
| NTPTP1  | 4000     | 1  | k <sub>cat</sub> |
| RPE     | 1180.013 | 1  | k <sub>cat</sub> |
| RPE     | 1300     | -1 | k <sub>cat</sub> |
| TALA    | 5.67     | -1 | k <sub>cat</sub> |
| PUNP1   | 38.785   | 1  | k <sub>cat</sub> |
| PUNP1   | 110      | -1 | k <sub>cat</sub> |
| PUNP2   | 38.785   | 1  | k <sub>cat</sub> |
| PUNP2   | 110      | -1 | k <sub>cat</sub> |
| PUNP3   | 15       | 1  | k <sub>cat</sub> |
| PUNP3   | 100.1667 | -1 | k <sub>cat</sub> |
| TKT1    | 21.92635 | 1  | k <sub>cat</sub> |
| PUNP5   | 50.945   | 1  | k <sub>cat</sub> |
| PUNP5   | 111.6667 | -1 | k <sub>cat</sub> |
| PUNP6   | 50.945   | 1  | k <sub>cat</sub> |
| PUNP6   | 111.6667 | -1 | k <sub>cat</sub> |
| PUNP7   | 50.61333 | 1  | k <sub>cat</sub> |
| PUNP7   | 110      | -1 | k <sub>cat</sub> |
| G6PDA   | 1800     | 1  | k <sub>cat</sub> |
| ALCD2x  | 24.37023 | 1  | k <sub>cat</sub> |
| ALCD2x  | 11.08    | -1 | k <sub>cat</sub> |
| RNDR3   | 8.115    | 1  | k <sub>cat</sub> |
| ALDD2y  | 0.04     | 1  | k <sub>cat</sub> |
| RMI     | 68       | 1  | k <sub>cat</sub> |
| RMI     | 1717     | -1 | k <sub>cat</sub> |
| TMDK1   | 114.104  | 1  | k <sub>cat</sub> |
| NADH10  | 0.077    | 1  | k <sub>cat</sub> |
| MDH     | 1035     | 1  | k <sub>cat</sub> |
| MDH     | 525      | -1 | k <sub>cat</sub> |
| ABTA    | 3.34559  | 1  | k <sub>cat</sub> |
| FUM     | 290.0556 | 1  | k <sub>cat</sub> |
| FUM     | 40.10714 | -1 | k <sub>cat</sub> |
| PYDXNK  | 0.3      | 1  | k <sub>cat</sub> |
| PYAM5PO | 14.86    | 1  | k <sub>cat</sub> |
| SSALx   | 31.7     | 1  | k <sub>cat</sub> |
| ASPT    | 180      | 1  | k <sub>cat</sub> |
| SERD_L  | 490      | 1  | k <sub>cat</sub> |
| THRD    | 135      | 1  | k <sub>cat</sub> |
| NMNAT   | 0.00089  | 1  | k <sub>cat</sub> |
| KARA1   | 0.00417  | 1  | k <sub>cat</sub> |
| HMPK1   | 0.00012  | 1  | k <sub>cat</sub> |
| ACCOAC  | 65.25    | 1  | k <sub>cat</sub> |
| GLXCL   | 18.9     | 1  | k <sub>cat</sub> |
| GLCS1   | 284      | 1  | k <sub>cat</sub> |
| GLCP    | 50.5     | 1  | k <sub>cat</sub> |
| RBK_L1  | 40.42    | 1  | k <sub>cat</sub> |
| RBP4E   | 9.27384  | 1  | k <sub>cat</sub> |
| NTD2    | 368.25   | 1  | k <sub>cat</sub> |
| GLCRAL  | 27.3     | 1  | k <sub>cat</sub> |
| NTD4    | 368.25   | 1  | k <sub>cat</sub> |
| NTD5    | 294.632  | 1  | k <sub>cat</sub> |
| KAS14   | 3        | 1  | k <sub>cat</sub> |
| AGMT    | 3        | 1  | k <sub>cat</sub> |
| NTD6    | 294.66   | 1  | k <sub>cat</sub> |
| PYDXPP  | 10.25    | 1  | k <sub>cat</sub> |
| ARGDC   | 5.02     | 1  | k <sub>cat</sub> |
| ECOAH1  | 1280     | -1 | k <sub>cat</sub> |
| G1SAT   | 0.59     | -1 | k <sub>cat</sub> |
| UGLT    | 340.75   | 1  | k <sub>cat</sub> |
| UGLT    | 283      | -1 | k <sub>cat</sub> |
| OAADC   | 2502.333 | 1  | k <sub>cat</sub> |
| MNNH    | 5.88     | 1  | k <sub>cat</sub> |
| DDGLK   | 26.68667 | 1  | k <sub>cat</sub> |
| XYLI2   | 16.91052 | 1  | k <sub>cat</sub> |
| XYLI2   | 11.085   | -1 | k <sub>cat</sub> |
| PMANM   | 4.15     | 1  | k <sub>cat</sub> |
| GLUR    | 43.33    | 1  | k <sub>cat</sub> |
| UAG2E   | 3.625    | 1  | k <sub>cat</sub> |

|                      |          |    |                  |
|----------------------|----------|----|------------------|
| HCYSMT               | 0.0375   | 1  | k <sub>cat</sub> |
| MACPD                | 3        | 1  | k <sub>cat</sub> |
| UDPG4E               | 18       | 1  | k <sub>cat</sub> |
| UDPG4E               | 750      | -1 | k <sub>cat</sub> |
| LACZ                 | 247.5    | 1  | k <sub>cat</sub> |
| XYLI1                | 68.93588 | 1  | k <sub>cat</sub> |
| XYLI1                | 7.7      | -1 | k <sub>cat</sub> |
| PPC                  | 540      | 1  | k <sub>cat</sub> |
| ALDD4                | 26.95    | 1  | k <sub>cat</sub> |
| G3PT                 | 160      | 1  | k <sub>cat</sub> |
| PYDXK                | 2.15     | 1  | k <sub>cat</sub> |
| HEX7                 | 31.385   | 1  | k <sub>cat</sub> |
| URIC                 | 24.7     | 1  | k <sub>cat</sub> |
| RMPA                 | 38.3     | 1  | k <sub>cat</sub> |
| TGBPA                | 2.1      | 1  | k <sub>cat</sub> |
| DMSOR1               | 79.9     | 1  | k <sub>cat</sub> |
| PGLYCP               | 94       | 1  | k <sub>cat</sub> |
| G1PTT                | 5.925    | 1  | k <sub>cat</sub> |
| TDPGDH               | 3.4      | 1  | k <sub>cat</sub> |
| ADCS                 | 0.53     | 1  | k <sub>cat</sub> |
| UDPGALM              | 1.5      | 1  | k <sub>cat</sub> |
| UMPK                 | 107.399  | 1  | k <sub>cat</sub> |
| DDPGALA              | 0.94     | 1  | k <sub>cat</sub> |
| ALLTN                | 310.85   | 1  | k <sub>cat</sub> |
| UPPRT                | 3.85333  | 1  | k <sub>cat</sub> |
| NTD9                 | 368.25   | 1  | k <sub>cat</sub> |
| NTD1                 | 294.646  | 1  | k <sub>cat</sub> |
| NTD7                 | 422.6667 | 1  | k <sub>cat</sub> |
| NDPK7                | 106      | 1  | k <sub>cat</sub> |
| TRPS3                | 2.09     | 1  | k <sub>cat</sub> |
| NTD10                | 368.25   | 1  | k <sub>cat</sub> |
| ADPT                 | 9.33     | 1  | k <sub>cat</sub> |
| GTPDPK               | 2.4825   | 1  | k <sub>cat</sub> |
| ADK1                 | 585.4    | 1  | k <sub>cat</sub> |
| ADK1                 | 783      | -1 | k <sub>cat</sub> |
| NDPK4                | 80.15    | 1  | k <sub>cat</sub> |
| ADA                  | 18.5     | 1  | k <sub>cat</sub> |
| DADA                 | 6.8      | 1  | k <sub>cat</sub> |
| ADD                  | 5.5      | 1  | k <sub>cat</sub> |
| AGDC                 | 95.875   | 1  | k <sub>cat</sub> |
| ASNN                 | 800.0064 | 1  | k <sub>cat</sub> |
| ASPCT                | 417      | 1  | k <sub>cat</sub> |
| MCOATA               | 1580     | 1  | k <sub>cat</sub> |
| DAPE                 | 75.5     | -1 | k <sub>cat</sub> |
| GSPMDA               | 2.1      | 1  | k <sub>cat</sub> |
| GSPMDS               | 4.2      | 1  | k <sub>cat</sub> |
| GUAD                 | 649      | 1  | k <sub>cat</sub> |
| TMAOR1               | 114      | 1  | k <sub>cat</sub> |
| DGK1                 | 70.5     | 1  | k <sub>cat</sub> |
| NDPK1                | 38       | 1  | k <sub>cat</sub> |
| TRDR                 | 16.955   | 1  | k <sub>cat</sub> |
| NNAM                 | 0.93     | 1  | k <sub>cat</sub> |
| P5CD                 | 19.15    | 1  | k <sub>cat</sub> |
| PGMT                 | 92.5     | 1  | k <sub>cat</sub> |
| SPMDAT1              | 2.958    | 1  | k <sub>cat</sub> |
| KG6PDC               | 51       | 1  | k <sub>cat</sub> |
| SPMDAT2              | 2.958    | 1  | k <sub>cat</sub> |
| TRE6PP               | 14.3     | 1  | k <sub>cat</sub> |
| BETALDH <sub>y</sub> | 276      | 1  | k <sub>cat</sub> |
| ADPRDP               | 117      | 1  | k <sub>cat</sub> |
| ACPS1                | 0.7      | 1  | k <sub>cat</sub> |
| ARAI                 | 39.36357 | 1  | k <sub>cat</sub> |
| M1PD                 | 8.5      | 1  | k <sub>cat</sub> |
| M1PD                 | 125      | -1 | k <sub>cat</sub> |
| G3PD2                | 291      | 1  | k <sub>cat</sub> |
| GALS3                | 118.25   | 1  | k <sub>cat</sub> |
| AMPN                 | 61       | 1  | k <sub>cat</sub> |
| ACCOAL               | 79.57143 | 1  | k <sub>cat</sub> |
| CYANST               | 245      | 1  | k <sub>cat</sub> |
| GMAND                | 5        | 1  | k <sub>cat</sub> |
| CYTD                 | 4.8      | 1  | k <sub>cat</sub> |
| DCTPD                | 1.24     | 1  | k <sub>cat</sub> |
| UAGAAT               | 9.16667  | 1  | k <sub>cat</sub> |
| CSND                 | 125.4667 | 1  | k <sub>cat</sub> |
| GLUN                 | 1270     | 1  | k <sub>cat</sub> |
| SERAT                | 115.217  | -1 | k <sub>cat</sub> |



|             |          |    |                  |
|-------------|----------|----|------------------|
| CYSS        | 24       | 1  | k <sub>cat</sub> |
| PAPSR       | 3.5      | 1  | k <sub>cat</sub> |
| ASPK        | 29.26818 | 1  | k <sub>cat</sub> |
| ASAD        | 199.932  | 1  | k <sub>cat</sub> |
| OCBT        | 2300.433 | 1  | k <sub>cat</sub> |
| OCBT        | 90       | -1 | k <sub>cat</sub> |
| GPDDA1      | 3.2      | 1  | k <sub>cat</sub> |
| GPDDA2      | 1.1      | 1  | k <sub>cat</sub> |
| ACBIPGT     | 0.058    | 1  | k <sub>cat</sub> |
| TRPS1       | 3.85906  | 1  | k <sub>cat</sub> |
| HPPPND0     | 18.11    | 1  | k <sub>cat</sub> |
| GLYCK2      | 350      | 1  | k <sub>cat</sub> |
| ACOTA       | 1.55     | 1  | k <sub>cat</sub> |
| CYTDH       | 11.6     | 1  | k <sub>cat</sub> |
| ETHAAL      | 30       | 1  | k <sub>cat</sub> |
| AP4AH       | 250      | 1  | k <sub>cat</sub> |
| ADNCYC      | 1.67     | 1  | k <sub>cat</sub> |
| MI1PP       | 3.79667  | 1  | k <sub>cat</sub> |
| PPAKr       | 657.4    | 1  | k <sub>cat</sub> |
| PPAKr       | 618.5    | -1 | k <sub>cat</sub> |
| TAUDO       | 2.34     | 1  | k <sub>cat</sub> |
| NTP3        | 422.9569 | 1  | k <sub>cat</sub> |
| PPM2        | 173      | 1  | k <sub>cat</sub> |
| ME2         | 66.6     | 1  | k <sub>cat</sub> |
| CBPS        | 3.15755  | 1  | k <sub>cat</sub> |
| ACOATA      | 0.30284  | 1  | k <sub>cat</sub> |
| ACOATA      | 0.30284  | -1 | k <sub>cat</sub> |
| MLTG1       | 0.24     | 1  | k <sub>cat</sub> |
| AMALT3      | 94.275   | 1  | k <sub>cat</sub> |
| ACNML       | 7.7      | 1  | k <sub>cat</sub> |
| FTHFLi      | 3.6      | 1  | k <sub>cat</sub> |
| UDPGD       | 1.95425  | 1  | k <sub>cat</sub> |
| GLCRD       | 9.66583  | 1  | k <sub>cat</sub> |
| TDPAGTA     | 5.66     | 1  | k <sub>cat</sub> |
| GLUDC       | 4.74727  | 1  | k <sub>cat</sub> |
| HSDy        | 8.367    | 1  | k <sub>cat</sub> |
| CYSTL       | 1.5      | 1  | k <sub>cat</sub> |
| AMALT1      | 112.825  | 1  | k <sub>cat</sub> |
| MLTP2       | 4.1      | 1  | k <sub>cat</sub> |
| MLTP2       | 52       | -1 | k <sub>cat</sub> |
| PACCOAL     | 30.85    | 1  | k <sub>cat</sub> |
| ACGAMT      | 1.2      | 1  | k <sub>cat</sub> |
| H2Otex      | 112      | -1 | k <sub>cat</sub> |
| FACOAL160t2 | 0.029    | 1  | k <sub>cat</sub> |
| FACOAL180t2 | 0.029    | 1  | k <sub>cat</sub> |
| NO3R1bpp    | 392.5    | 1  | k <sub>cat</sub> |
| NO3R2pp     | 2.5      | 1  | k <sub>cat</sub> |
| NTP3pp      | 422.9569 | 1  | k <sub>cat</sub> |
| NO3R2bpp    | 392.5    | 1  | k <sub>cat</sub> |
| TMAOR1pp    | 258      | 1  | k <sub>cat</sub> |
| TRE6PS      | 5.2      | 1  | k <sub>cat</sub> |
| DRPA        | 294.5    | 1  | k <sub>cat</sub> |
| TKT2        | 20.43874 | 1  | k <sub>cat</sub> |
| UDCPDP      | 9        | 1  | k <sub>cat</sub> |
| TREH        | 199      | 1  | k <sub>cat</sub> |
| ATPS4rpp    | 270      | 1  | k <sub>cat</sub> |
| ATPS4rpp    | 217      | -1 | k <sub>cat</sub> |
| CYTK2       | 41.66667 | 1  | k <sub>cat</sub> |
| O2tex       | 491      | 1  | k <sub>cat</sub> |
| NTD8pp      | 246.8733 | 1  | k <sub>cat</sub> |
| CSnt2pp     | 165      | 1  | k <sub>cat</sub> |
| TREHpp      | 199      | 1  | k <sub>cat</sub> |
| ACGAMK      | 0.03167  | 1  | k <sub>cat</sub> |
| METS        | 0.12     | 1  | k <sub>cat</sub> |
| ASPO5       | 5.55     | 1  | k <sub>cat</sub> |
| ASPO4       | 2.6      | 1  | k <sub>cat</sub> |
| FDMO4       | 0.86     | 1  | k <sub>cat</sub> |
| L_LACD3     | 178.7143 | 1  | k <sub>cat</sub> |
| L_LACD2     | 178.7143 | 1  | k <sub>cat</sub> |
| CYANSTpp    | 245      | 1  | k <sub>cat</sub> |
| MCPST       | 12.5     | 1  | k <sub>cat</sub> |
| UDCPDPpp    | 9        | 1  | k <sub>cat</sub> |
| NODOy       | 670      | 1  | k <sub>cat</sub> |
| GALM2pp     | 18400    | 1  | k <sub>cat</sub> |
| NODOx       | 670      | 1  | k <sub>cat</sub> |
| NHFRBO      | 14.9     | 1  | k <sub>cat</sub> |

|             |          |    |                  |
|-------------|----------|----|------------------|
| 42A12BOOXpp | 33.1032  | 1  | k <sub>cat</sub> |
| TYROXDApp   | 28.89711 | 1  | k <sub>cat</sub> |
| RNDR3b      | 2.5      | 1  | k <sub>cat</sub> |
| FEROpp      | 0.7125   | 1  | k <sub>cat</sub> |
| LACZpp      | 33.8     | 1  | k <sub>cat</sub> |
| GPDDA1pp    | 3.2      | 1  | k <sub>cat</sub> |
| GPDDA5pp    | 1.8      | 1  | k <sub>cat</sub> |
| FLVR        | 47.87692 | 1  | k <sub>cat</sub> |
| PSP_Lpp     | 26.8     | 1  | k <sub>cat</sub> |
| TYRpp       | 62.4     | 1  | k <sub>cat</sub> |
| PAPSR2      | 3.5      | 1  | k <sub>cat</sub> |
| FACOAL80t2p | 0.029    | 1  | k <sub>cat</sub> |
| PPGPPDP     | 3        | 1  | k <sub>cat</sub> |
| GUACYC      | 28.7     | 1  | k <sub>cat</sub> |
| 23PDE9pp    | 1.97     | 1  | k <sub>cat</sub> |
| SARCOX      | 37.43333 | 1  | k <sub>cat</sub> |
| FACOAL60t2p | 0.029    | 1  | k <sub>cat</sub> |
| ASNpp       | 800.0064 | 1  | k <sub>cat</sub> |
| GLUNpp      | 1270     | 1  | k <sub>cat</sub> |
| NTD12       | 294.648  | 1  | k <sub>cat</sub> |
| NTD10pp     | 368.25   | 1  | k <sub>cat</sub> |
| NTD1pp      | 294.646  | 1  | k <sub>cat</sub> |
| NTD2pp      | 368.25   | 1  | k <sub>cat</sub> |
| NTD3pp      | 368.25   | 1  | k <sub>cat</sub> |
| NTD4pp      | 368.25   | 1  | k <sub>cat</sub> |
| NTD5pp      | 294.632  | 1  | k <sub>cat</sub> |
| NTD6pp      | 294.66   | 1  | k <sub>cat</sub> |
| NTD7pp      | 422.6667 | 1  | k <sub>cat</sub> |
| NTD9pp      | 368.25   | 1  | k <sub>cat</sub> |
| NH4tex      | 236      | 1  | k <sub>cat</sub> |
| PEAMNOpp    | 14.92857 | 1  | k <sub>cat</sub> |
| GAL1PPpp    | 0.0348   | 1  | k <sub>cat</sub> |
| NTPP9       | 0.16     | 1  | k <sub>cat</sub> |
| NTPP10      | 0.16     | 1  | k <sub>cat</sub> |
| ARGDCpp     | 5.02     | 1  | k <sub>cat</sub> |
| URIH        | 9.3      | 1  | k <sub>cat</sub> |
| INSH        | 0.043    | 1  | k <sub>cat</sub> |
| FACOAL100t2 | 0.029    | 1  | k <sub>cat</sub> |
| GPDDA3pp    | 2.8      | 1  | k <sub>cat</sub> |
| GPDDA4pp    | 3.3      | 1  | k <sub>cat</sub> |
| GPDDA2pp    | 1.1      | 1  | k <sub>cat</sub> |
| FACOAL120t2 | 0.029    | 1  | k <sub>cat</sub> |
| FACOAL140t2 | 0.029    | 1  | k <sub>cat</sub> |
| HCYSMT2     | 0.38     | 1  | k <sub>cat</sub> |
| FALDH2      | 51.7     | 1  | k <sub>cat</sub> |
| CO2tex      | 380      | 1  | k <sub>cat</sub> |
| CBIAT       | 0.0775   | 1  | k <sub>cat</sub> |
| NTD12pp     | 294.648  | 1  | k <sub>cat</sub> |
| 3NTD2pp     | 0.23     | 1  | k <sub>cat</sub> |
| 3NTD9pp     | 8.04     | 1  | k <sub>cat</sub> |
| GLUDy       | 2136     | 1  | k <sub>cat</sub> |
| GLUDy       | 19466.67 | -1 | k <sub>cat</sub> |
| 23PDE7pp    | 7.63     | 1  | k <sub>cat</sub> |
| GLYCLTDy    | 7.48333  | 1  | k <sub>cat</sub> |
| LYSDC       | 405.5    | 1  | k <sub>cat</sub> |
| NTD3        | 368.25   | 1  | k <sub>cat</sub> |
| GTPDPDP     | 0.023    | 1  | k <sub>cat</sub> |
| DHFR        | 3.1513   | 1  | k <sub>cat</sub> |
| TYRTA       | 31.075   | 1  | k <sub>cat</sub> |
| TYRTA       | 64.16667 | -1 | k <sub>cat</sub> |
| SHKK        | 35       | 1  | k <sub>cat</sub> |
| GLUSy       | 24.55    | 1  | k <sub>cat</sub> |
| GUAPRT      | 12.4865  | 1  | k <sub>cat</sub> |
| ABUTD       | 7.7      | 1  | k <sub>cat</sub> |
| E4PD        | 20       | 1  | k <sub>cat</sub> |
| DMSOR2pp    | 79.9     | 1  | k <sub>cat</sub> |
| DUTPDP      | 22.6625  | 1  | k <sub>cat</sub> |
| NO3R1pp     | 392.5    | 1  | k <sub>cat</sub> |
| NTP5        | 317.8481 | 1  | k <sub>cat</sub> |
| DPR         | 25       | 1  | k <sub>cat</sub> |
| NTD8        | 246.8733 | 1  | k <sub>cat</sub> |
| GALCTD      | 22       | 1  | k <sub>cat</sub> |
| PUNP4       | 50.61333 | 1  | k <sub>cat</sub> |
| PUNP4       | 100.1667 | -1 | k <sub>cat</sub> |
| G6PP        | 700      | 1  | k <sub>cat</sub> |
| GLNS        | 6        | 1  | k <sub>cat</sub> |

|             |          |    |                  |
|-------------|----------|----|------------------|
| ACACT1r     | 15.8     | 1  | k <sub>cat</sub> |
| ACACT1r     | 159.5909 | -1 | k <sub>cat</sub> |
| NTD11pp     | 368.25   | 1  | k <sub>cat</sub> |
| PDE1        | 63.4     | 1  | k <sub>cat</sub> |
| AMALT2      | 123.625  | 1  | k <sub>cat</sub> |
| MLTP1       | 5.4      | 1  | k <sub>cat</sub> |
| MLTP1       | 52       | -1 | k <sub>cat</sub> |
| ALAALAR     | 15.13    | 1  | k <sub>cat</sub> |
| ADNK1       | 8.09733  | 1  | k <sub>cat</sub> |
| UDPGPpp     | 71       | 1  | k <sub>cat</sub> |
| PPPGO       | 3.35443  | 1  | k <sub>cat</sub> |
| LDH_D2      | 875      | 1  | k <sub>cat</sub> |
| SUCOAS      | 25.66667 | 1  | k <sub>cat</sub> |
| SUCOAS      | 21       | -1 | k <sub>cat</sub> |
| CYSDDS      | 72       | 1  | k <sub>cat</sub> |
| NTP1        | 430.5998 | 1  | k <sub>cat</sub> |
| GPDDA4      | 3.3      | 1  | k <sub>cat</sub> |
| GALKr       | 15.66727 | 1  | k <sub>cat</sub> |
| G1PPpp      | 117      | 1  | k <sub>cat</sub> |
| LDH_D       | 320.5    | -1 | k <sub>cat</sub> |
| AMALT4      | 84.05    | 1  | k <sub>cat</sub> |
| NTD11       | 368.25   | 1  | k <sub>cat</sub> |
| IPDDI       | 19.41364 | 1  | k <sub>cat</sub> |
| ORNDC       | 17.22986 | 1  | k <sub>cat</sub> |
| UPP3MT      | 38       | 1  | k <sub>cat</sub> |
| FACOAL181t2 | 0.029    | 1  | k <sub>cat</sub> |
| EAR141y     | 130.2    | 1  | k <sub>cat</sub> |
| CFAS160G    | 0.39765  | 1  | k <sub>cat</sub> |
| FACOAL141t2 | 0.029    | 1  | k <sub>cat</sub> |
| FACOAL161t2 | 0.029    | 1  | k <sub>cat</sub> |
| SERD_D      | 13.1     | 1  | k <sub>cat</sub> |
| FLVRx       | 28.85    | 1  | k <sub>cat</sub> |
| FMNRx       | 6        | 1  | k <sub>cat</sub> |
| FORtex      | 272      | -1 | k <sub>cat</sub> |
| PFK         | 83.6016  | 1  | k <sub>cat</sub> |
| PDXSPOi     | 5.185    | 1  | k <sub>cat</sub> |
| PGM         | 255.2021 | -1 | k <sub>cat</sub> |
| CYTBO3_4pp  | 814.4    | 1  | k <sub>cat</sub> |
| GLYCK       | 350      | 1  | k <sub>cat</sub> |
| GPDDA3      | 2.8      | 1  | k <sub>cat</sub> |
| TPI         | 9000     | -1 | k <sub>cat</sub> |
| EAR181y     | 130.2    | 1  | k <sub>cat</sub> |
| DASYN140    | 8.92     | 1  | k <sub>cat</sub> |
| DASYN180    | 8.92     | 1  | k <sub>cat</sub> |
| DASYN141    | 8.92     | 1  | k <sub>cat</sub> |
| RPI         | 2100     | 1  | k <sub>cat</sub> |
| RPI         | 50       | -1 | k <sub>cat</sub> |
| SFGTHi      | 17.505   | 1  | k <sub>cat</sub> |
| PYDAMK      | 0.55     | 1  | k <sub>cat</sub> |
| DHORDfum    | 7.8      | 1  | k <sub>cat</sub> |
| FACOAE120   | 50       | 1  | k <sub>cat</sub> |
| DSBCGT      | 25.2     | 1  | k <sub>cat</sub> |
| EAR180y     | 130.2    | 1  | k <sub>cat</sub> |
| ACONTb      | 44.8     | 1  | k <sub>cat</sub> |
| GLCP2       | 50.5     | 1  | k <sub>cat</sub> |
| SUCDi       | 167      | 1  | k <sub>cat</sub> |
| LALDO2x     | 266      | 1  | k <sub>cat</sub> |
| ASNS1       | 1.89833  | 1  | k <sub>cat</sub> |
| EAR80y      | 130.2    | 1  | k <sub>cat</sub> |
| EAR120y     | 130.2    | 1  | k <sub>cat</sub> |
| EAR121y     | 130.2    | 1  | k <sub>cat</sub> |
| EAR40y      | 130.2    | 1  | k <sub>cat</sub> |
| EAR161y     | 130.2    | 1  | k <sub>cat</sub> |
| 3OAS140     | 3        | 1  | k <sub>cat</sub> |
| EAR160y     | 130.2    | 1  | k <sub>cat</sub> |
| PDE4        | 0.00096  | 1  | k <sub>cat</sub> |
| EAR100y     | 130.2    | 1  | k <sub>cat</sub> |
| ACONTa      | 5.3      | 1  | k <sub>cat</sub> |
| ACONTa      | 44.8     | -1 | k <sub>cat</sub> |
| CFAS160E    | 0.39765  | 1  | k <sub>cat</sub> |
| CFAS180E    | 0.39765  | 1  | k <sub>cat</sub> |
| CFAS180G    | 0.39765  | 1  | k <sub>cat</sub> |
| DAGK140     | 2.8      | 1  | k <sub>cat</sub> |
| DAGK160     | 1.7      | 1  | k <sub>cat</sub> |
| 3OAS60      | 3        | 1  | k <sub>cat</sub> |
| 3OAS160     | 3        | 1  | k <sub>cat</sub> |

|             |       |    |                  |
|-------------|-------|----|------------------|
| EAR140y     | 130.2 | 1  | k <sub>cat</sub> |
| 3OAS80      | 3     | 1  | k <sub>cat</sub> |
| 3OAS100     | 3     | 1  | k <sub>cat</sub> |
| 3OAS120     | 3     | 1  | k <sub>cat</sub> |
| LSERDHR     | 4.2   | 1  | k <sub>cat</sub> |
| DASYN120    | 8.92  | 1  | k <sub>cat</sub> |
| EAR60y      | 130.2 | 1  | k <sub>cat</sub> |
| DAGK181     | 2.8   | 1  | k <sub>cat</sub> |
| NTP11       | 0.22  | 1  | k <sub>cat</sub> |
| 3OAR180     | 71    | 1  | k <sub>cat</sub> |
| 3OAS180     | 3     | 1  | k <sub>cat</sub> |
| ACOAD6f     | 6     | 1  | k <sub>cat</sub> |
| NADH16pp    | 1517  | 1  | k <sub>cat</sub> |
| NADH18pp    | 1517  | 1  | k <sub>cat</sub> |
| NADH17pp    | 1517  | 1  | k <sub>cat</sub> |
| DTARTD      | 7.3   | 1  | k <sub>cat</sub> |
| OXCDC       | 88    | 1  | k <sub>cat</sub> |
| CTECOAI8    | 47    | 1  | k <sub>cat</sub> |
| CTECOAI8    | 12    | -1 | k <sub>cat</sub> |
| CTECOAI6    | 63    | 1  | k <sub>cat</sub> |
| SELR        | 387   | 1  | k <sub>cat</sub> |
| FLDR2       | 273.5 | 1  | k <sub>cat</sub> |
| THFAT       | 18.4  | 1  | k <sub>cat</sub> |
| ALDD19xr    | 96.8  | 1  | k <sub>cat</sub> |
| MMM         | 48    | 1  | k <sub>cat</sub> |
| GTHPi       | 221.7 | 1  | k <sub>cat</sub> |
| ACOAD1f     | 9.6   | 1  | k <sub>cat</sub> |
| 26DAHtex    | 65    | 1  | transporter      |
| 26DAHtex    | 65    | -1 | transporter      |
| HCINNMtex   | 65    | 1  | transporter      |
| HCINNMtex   | 65    | -1 | transporter      |
| HPPPntex    | 65    | 1  | transporter      |
| HPPPntex    | 65    | -1 | transporter      |
| ACTex       | 65    | 1  | transporter      |
| ACTex       | 65    | -1 | transporter      |
| ACALDtex    | 65    | 1  | transporter      |
| ACALDtex    | 65    | -1 | transporter      |
| ACMANAtex   | 65    | 1  | transporter      |
| ACMANAtex   | 65    | -1 | transporter      |
| ACMUJMtex   | 65    | 1  | transporter      |
| SUCct2_2pp  | 65    | 1  | transporter      |
| SUCFUMtpp   | 65    | 1  | transporter      |
| SUCFUMtpp   | 65    | -1 | transporter      |
| SUCptspp    | 65    | 1  | transporter      |
| SULabcpp    | 65    | 1  | transporter      |
| TSULabcpp   | 65    | 1  | transporter      |
| TARTRt7pp   | 65    | 1  | transporter      |
| TARTRt7pp   | 65    | -1 | transporter      |
| TAURabcpp   | 65    | 1  | transporter      |
| THMDt2pp_cc | 65    | 1  | transporter      |
| NMNTt7pp    | 65    | 1  | transporter      |
| GLUtex      | 65    | 1  | transporter      |
| GLUtex      | 65    | -1 | transporter      |
| Kt2pp       | 65    | 1  | transporter      |
| GLYtex      | 65    | 1  | transporter      |
| GLYtex      | 65    | -1 | transporter      |
| GLYALDtex   | 65    | 1  | transporter      |
| GLYALDtex   | 65    | -1 | transporter      |
| AKGt2rpp    | 65    | 1  | transporter      |
| AKGt2rpp    | 65    | -1 | transporter      |
| XYLt2pp     | 65    | 1  | transporter      |
| GLYBtex     | 65    | 1  | transporter      |
| GLYBtex     | 65    | -1 | transporter      |
| GLYCtex     | 65    | 1  | transporter      |
| GLYCtex     | 65    | -1 | transporter      |
| GLYC3Ptex   | 65    | 1  | transporter      |
| GLYC3Ptex   | 65    | -1 | transporter      |
| GLYCLTtex   | 65    | 1  | transporter      |
| GLYCLTtex   | 65    | -1 | transporter      |
| GTPtex      | 65    | 1  | transporter      |
| GTPtex      | 65    | -1 | transporter      |
| GUAAtex     | 65    | 1  | transporter      |
| GUAAtex     | 65    | -1 | transporter      |
| Htex        | 65    | 1  | transporter      |
| Htex        | 65    | -1 | transporter      |
| H2tex       | 65    | 1  | transporter      |
| H2tex       | 65    | -1 | transporter      |
| H2Otex      | 65    | 1  | transporter      |
| O2tpp       | 65    | 1  | transporter      |
| O2tpp       | 65    | -1 | transporter      |
| PYRt2rpp    | 65    | 1  | transporter      |
| PYRt2rpp    | 65    | -1 | transporter      |
| THMabcpp    | 65    | 1  | transporter      |
| THMDt2pp_cc | 65    | 1  | transporter      |
| THMDt2pp_cc | 65    | -1 | transporter      |
| THRabcpp    | 65    | 1  | transporter      |

|              |    |    |             |
|--------------|----|----|-------------|
| TREptspp     | 65 | 1  | transporter |
| XANtpp       | 65 | 1  | transporter |
| XANtpp       | 65 | -1 | transporter |
| DAPtex       | 65 | 1  | transporter |
| DAPtex       | 65 | -1 | transporter |
| TRPt2rpp     | 65 | 1  | transporter |
| TRPt2rpp     | 65 | -1 | transporter |
| TYRt2rpp     | 65 | 1  | transporter |
| TYRt2rpp     | 65 | -1 | transporter |
| URIt2pp_copy | 65 | 1  | transporter |
| URIt2pp_copy | 65 | 1  | transporter |
| URIt2pp_copy | 65 | -1 | transporter |
| VAlabcpp     | 65 | 1  | transporter |
| 12PPDStex    | 65 | 1  | transporter |
| 12PPDStex    | 65 | -1 | transporter |
| DDGLCNtex    | 65 | 1  | transporter |
| DDGLCNtex    | 65 | -1 | transporter |
| XTSnt2rpp    | 65 | 1  | transporter |
| XTSnt2rpp    | 65 | -1 | transporter |
| XYLabcpp     | 65 | 1  | transporter |
| XYLut2pp     | 65 | 1  | transporter |
| THRt4pp      | 65 | 1  | transporter |
| GALURtex     | 65 | 1  | transporter |
| GALURtex     | 65 | -1 | transporter |
| FEOXAMabcpp  | 65 | 1  | transporter |
| GALtex       | 65 | 1  | transporter |
| GALtex       | 65 | -1 | transporter |
| CBL1abcpp    | 65 | 1  | transporter |
| ACAct2pp     | 65 | 1  | transporter |
| ACAct2pp     | 65 | -1 | transporter |
| ACGAptspp    | 65 | 1  | transporter |
| ACMANAptspp  | 65 | 1  | transporter |
| ACNAMt2pp    | 65 | 1  | transporter |
| GALCTtex     | 65 | 1  | transporter |
| GALCTtex     | 65 | -1 | transporter |
| GALCTNtex    | 65 | 1  | transporter |
| GALCTNtex    | 65 | -1 | transporter |
| GALTex       | 65 | 1  | transporter |
| GALTex       | 65 | -1 | transporter |
| FEENTERabcpp | 65 | 1  | transporter |
| FECRMabcpp   | 65 | 1  | transporter |
| GAMtex       | 65 | 1  | transporter |
| GAMtex       | 65 | -1 | transporter |
| GBBTNtex     | 65 | 1  | transporter |
| GBBTNtex     | 65 | -1 | transporter |
| INDOLEtex    | 65 | 1  | transporter |
| INDOLEtex    | 65 | -1 | transporter |
| ARbt2rpp     | 65 | 1  | transporter |
| ARbt2rpp     | 65 | -1 | transporter |
| DAPabcpp     | 65 | 1  | transporter |
| L_LACtex     | 65 | 1  | transporter |
| L_LACtex     | 65 | -1 | transporter |
| ACT4pp       | 65 | 1  | transporter |
| ADEt2rpp     | 65 | 1  | transporter |
| ADEt2rpp     | 65 | -1 | transporter |
| CO2tpp       | 65 | 1  | transporter |
| CO2tpp       | 65 | -1 | transporter |
| DHAtp        | 65 | 1  | transporter |
| DHAtp        | 65 | -1 | transporter |
| ARGabcpp     | 65 | 1  | transporter |
| ADNt2pp_cop  | 65 | 1  | transporter |
| ADNt2pp_cop  | 65 | 1  | transporter |
| ADNt2pp_cop  | 65 | -1 | transporter |
| ALAabcpp     | 65 | 1  | transporter |
| ALLabcpp     | 65 | 1  | transporter |
| ALLTnt2rpp   | 65 | 1  | transporter |
| ALLTnt2rpp   | 65 | -1 | transporter |
| ARBabcpp     | 65 | 1  | transporter |
| ARGAGMt7pp   | 65 | 1  | transporter |
| ARGAGMt7pp   | 65 | -1 | transporter |
| ASCBptspp    | 65 | 1  | transporter |
| ASnt2rpp     | 65 | 1  | transporter |
| ASnt2rpp     | 65 | -1 | transporter |
| ASPabcpp     | 65 | 1  | transporter |
| ASPt2pp      | 65 | 1  | transporter |
| GUAtp        | 65 | 1  | transporter |
| GUAtp        | 65 | -1 | transporter |
| ASPt2_2pp    | 65 | 1  | transporter |
| HYXNtpp      | 65 | 1  | transporter |
| HYXNtpp      | 65 | -1 | transporter |
| NACTpp       | 65 | 1  | transporter |
| ASPt2_3pp    | 65 | 1  | transporter |
| HISStex      | 65 | 1  | transporter |
| HISStex      | 65 | -1 | transporter |
| FE3DCITabcpp | 65 | 1  | transporter |
| HXAtex       | 65 | 1  | transporter |
| HXAtex       | 65 | -1 | transporter |
| HYXNtex      | 65 | 1  | transporter |
| HYXNtex      | 65 | -1 | transporter |
| IDONtex      | 65 | 1  | transporter |
| IDONtex      | 65 | -1 | transporter |

|              |    |    |             |
|--------------|----|----|-------------|
| lLEtex       | 65 | 1  | transporter |
| lLEtex       | 65 | -1 | transporter |
| INSTtex      | 65 | 1  | transporter |
| INSTtex      | 65 | -1 | transporter |
| INStex       | 65 | 1  | transporter |
| INStex       | 65 | -1 | transporter |
| Ktex         | 65 | 1  | transporter |
| Ktex         | 65 | -1 | transporter |
| CPGNtonex    | 65 | 1  | transporter |
| GLCRtex      | 65 | 1  | transporter |
| GLCRtex      | 65 | -1 | transporter |
| GLCNTex      | 65 | 1  | transporter |
| GLCNTex      | 65 | -1 | transporter |
| GLCURtex     | 65 | 1  | transporter |
| GLCURtex     | 65 | -1 | transporter |
| GLNtex       | 65 | 1  | transporter |
| GLNtex       | 65 | -1 | transporter |
| O2tex        | 65 | -1 | transporter |
| OCTAtex      | 65 | 1  | transporter |
| OCTAtex      | 65 | -1 | transporter |
| D_LACtex     | 65 | 1  | transporter |
| D_LACtex     | 65 | -1 | transporter |
| ORNtex       | 65 | 1  | transporter |
| ORNtex       | 65 | -1 | transporter |
| FRULYStex    | 65 | 1  | transporter |
| FRULYStex    | 65 | -1 | transporter |
| MALTexi      | 65 | 1  | transporter |
| CIT17pp      | 65 | 1  | transporter |
| CRNt7pp      | 65 | 1  | transporter |
| GLCtex_copy1 | 65 | 1  | transporter |
| CHLabcpp     | 65 | 1  | transporter |
| DGSNt2pp     | 65 | 1  | transporter |
| FE3DCITtonex | 65 | 1  | transporter |
| DINST2pp     | 65 | 1  | transporter |
| DURIt2pp     | 65 | 1  | transporter |
| FE2abcpp     | 65 | 1  | transporter |
| FRUptspp     | 65 | 1  | transporter |
| FUCtpp       | 65 | 1  | transporter |
| FUCtpp       | 65 | -1 | transporter |
| GALCT12rpp   | 65 | 1  | transporter |
| GALCT2rpp    | 65 | -1 | transporter |
| GALt2pp      | 65 | 1  | transporter |
| ASPtex       | 65 | 1  | transporter |
| ASPtex       | 65 | -1 | transporter |
| ABUTt2pp     | 65 | 1  | transporter |
| FUMt2_2pp    | 65 | 1  | transporter |
| FUMt2_3pp    | 65 | 1  | transporter |
| PHEtex       | 65 | 1  | transporter |
| PHEtex       | 65 | -1 | transporter |
| FEENTERtonex | 65 | 1  | transporter |
| CYNTt2pp     | 65 | 1  | transporter |
| CYSabcpp     | 65 | 1  | transporter |
| SBTptspp     | 65 | 1  | transporter |
| Pltex        | 65 | 1  | transporter |
| Pltex        | 65 | -1 | transporter |
| CYDt2pp_cog  | 65 | 1  | transporter |
| CYDt2pp_cog  | 65 | 1  | transporter |
| CYDt2pp_cog  | 65 | -1 | transporter |
| DADNt2pp     | 65 | 1  | transporter |
| DCYTt2pp     | 65 | 1  | transporter |
| ACALDtp      | 65 | 1  | transporter |
| ACALDtp      | 65 | -1 | transporter |
| Act2rpp      | 65 | 1  | transporter |
| Act2rpp      | 65 | -1 | transporter |
| DDGLCNt2rpp  | 65 | 1  | transporter |
| DDGLCNt2rpp  | 65 | -1 | transporter |
| RMNtex       | 65 | 1  | transporter |
| RMNtex       | 65 | -1 | transporter |
| MALTRtexi    | 65 | 1  | transporter |
| MALTRtexi    | 65 | 1  | transporter |
| MALPTtexi    | 65 | 1  | transporter |
| LCTStex      | 65 | 1  | transporter |
| LCTStex      | 65 | -1 | transporter |
| LEUtex       | 65 | 1  | transporter |
| LEUtex       | 65 | -1 | transporter |
| LYStex       | 65 | 1  | transporter |
| LYStex       | 65 | -1 | transporter |
| LYXtex       | 65 | 1  | transporter |
| LYXtex       | 65 | -1 | transporter |
| MANtex       | 65 | 1  | transporter |
| MANtex       | 65 | -1 | transporter |
| MAN6Ptex     | 65 | 1  | transporter |
| MAN6Ptex     | 65 | -1 | transporter |
| CYSabc2pp    | 65 | 1  | transporter |
| BUTSO3abcpp  | 65 | 1  | transporter |
| ETHSO3abcpp  | 65 | 1  | transporter |
| MELIBtex     | 65 | 1  | transporter |
| MELIBtex     | 65 | -1 | transporter |
| DMSOtex      | 65 | 1  | transporter |
| DMSOtex      | 65 | -1 | transporter |
| DURItex      | 65 | 1  | transporter |

|              |    |    |             |
|--------------|----|----|-------------|
| DURitex      | 65 | -1 | transporter |
| FRUtex       | 65 | 1  | transporter |
| FRUtex       | 65 | -1 | transporter |
| FUCtex       | 65 | 1  | transporter |
| FUCtex       | 65 | -1 | transporter |
| FUMtex       | 65 | 1  | transporter |
| FUMtex       | 65 | -1 | transporter |
| FE2tex       | 65 | 1  | transporter |
| FE2tex       | 65 | -1 | transporter |
| NMNtex       | 65 | 1  | transporter |
| NMNtex       | 65 | -1 | transporter |
| NO2tex       | 65 | 1  | transporter |
| NO2tex       | 65 | -1 | transporter |
| FEOXAMUtex   | 65 | 1  | transporter |
| ARBTNtpp     | 65 | 1  | transporter |
| ARBTNtpp     | 65 | 1  | transporter |
| BUTt2rpp     | 65 | 1  | transporter |
| BUTt2rpp     | 65 | -1 | transporter |
| CADVtpp      | 65 | 1  | transporter |
| 23CAMPtex    | 65 | 1  | transporter |
| 23CAMPtex    | 65 | -1 | transporter |
| 23CCMPtex    | 65 | 1  | transporter |
| 23CCMPtex    | 65 | -1 | transporter |
| 23CUMPtex    | 65 | 1  | transporter |
| 23CUMPtex    | 65 | -1 | transporter |
| 23CGMPtex    | 65 | 1  | transporter |
| 23CGMPtex    | 65 | -1 | transporter |
| 3AMPtex      | 65 | 1  | transporter |
| 3AMPtex      | 65 | -1 | transporter |
| 3CMPtex      | 65 | 1  | transporter |
| 3CMPtex      | 65 | -1 | transporter |
| GDPtex       | 65 | 1  | transporter |
| GDPtex       | 65 | -1 | transporter |
| FEENTERtpp   | 65 | 1  | transporter |
| TMAtex       | 65 | 1  | transporter |
| TMAtex       | 65 | -1 | transporter |
| TMAOtex      | 65 | 1  | transporter |
| TMAOtex      | 65 | -1 | transporter |
| TREtex       | 65 | 1  | transporter |
| TREtex       | 65 | -1 | transporter |
| FEENTERtex   | 65 | 1  | transporter |
| FE3HOXUtpp   | 65 | 1  | transporter |
| FEOXAMUtpp   | 65 | 1  | transporter |
| FECRMUtpp    | 65 | 1  | transporter |
| TRPtex       | 65 | 1  | transporter |
| TRPtex       | 65 | -1 | transporter |
| PTRCt2pp     | 65 | 1  | transporter |
| PNTOtex      | 65 | 1  | transporter |
| PNTOtex      | 65 | -1 | transporter |
| TSULtex      | 65 | 1  | transporter |
| TSULtex      | 65 | -1 | transporter |
| TYRtex       | 65 | 1  | transporter |
| TYRtex       | 65 | -1 | transporter |
| URAtex       | 65 | 1  | transporter |
| URAtex       | 65 | -1 | transporter |
| UREAtex      | 65 | 1  | transporter |
| UREAtex      | 65 | -1 | transporter |
| URItex       | 65 | 1  | transporter |
| URItex       | 65 | -1 | transporter |
| SULFACabcpp  | 65 | 1  | transporter |
| ETHSO3tex    | 65 | 1  | transporter |
| ETHSO3tex    | 65 | -1 | transporter |
| BUTSO3tex    | 65 | 1  | transporter |
| BUTSO3tex    | 65 | -1 | transporter |
| LIPOtex      | 65 | 1  | transporter |
| LIPOtex      | 65 | -1 | transporter |
| VALtex       | 65 | 1  | transporter |
| VALtex       | 65 | -1 | transporter |
| XANtex       | 65 | 1  | transporter |
| XANtex       | 65 | -1 | transporter |
| XYLtex       | 65 | 1  | transporter |
| XYLtex       | 65 | -1 | transporter |
| PPPNtex      | 65 | 1  | transporter |
| PPPNtex      | 65 | -1 | transporter |
| ABUTtex      | 65 | 1  | transporter |
| ABUTtex      | 65 | -1 | transporter |
| FORTppi      | 65 | 1  | transporter |
| PHEMEabcpp   | 65 | 1  | transporter |
| METSOX1abcpp | 65 | 1  | transporter |
| PPTtex       | 65 | 1  | transporter |
| PPTtex       | 65 | -1 | transporter |
| GALBDtex     | 65 | 1  | transporter |
| GALBDtex     | 65 | -1 | transporter |
| PTRCtex      | 65 | 1  | transporter |
| PTRCtex      | 65 | -1 | transporter |
| PYRtex       | 65 | 1  | transporter |
| PYRtex       | 65 | -1 | transporter |
| CU1abcpp     | 65 | 1  | transporter |
| HG2abcpp     | 65 | 1  | transporter |
| SULFACTex    | 65 | 1  | transporter |
| SULFACTex    | 65 | -1 | transporter |

|              |    |    |             |
|--------------|----|----|-------------|
| DSERtex      | 65 | 1  | transporter |
| DSERtex      | 65 | -1 | transporter |
| SERtex       | 65 | 1  | transporter |
| SERtex       | 65 | -1 | transporter |
| NOTex        | 65 | 1  | transporter |
| NOTex        | 65 | -1 | transporter |
| NOTpp        | 65 | 1  | transporter |
| NOTpp        | 65 | -1 | transporter |
| N2Otp        | 65 | 1  | transporter |
| N2Otp        | 65 | -1 | transporter |
| N2Otex       | 65 | 1  | transporter |
| N2Otex       | 65 | -1 | transporter |
| CRNt8pp      | 65 | 1  | transporter |
| CRNt2rpp     | 65 | 1  | transporter |
| CRNt2rpp     | 65 | -1 | transporter |
| CRNDt2rpp    | 65 | 1  | transporter |
| CRNDt2rpp    | 65 | -1 | transporter |
| CTBTt2rpp    | 65 | 1  | transporter |
| CTBTt2rpp    | 65 | -1 | transporter |
| PACALDt2rpp  | 65 | 1  | transporter |
| PACALDt2rpp  | 65 | -1 | transporter |
| PEAMNtex     | 65 | 1  | transporter |
| PEAMNtex     | 65 | -1 | transporter |
| PACALDtex    | 65 | 1  | transporter |
| PACALDtex    | 65 | -1 | transporter |
| LIPDt2pp     | 65 | 1  | transporter |
| ACGAL1Ptex   | 65 | 1  | transporter |
| ACGAL1Ptex   | 65 | -1 | transporter |
| ACGALtex     | 65 | 1  | transporter |
| ACGALtex     | 65 | -1 | transporter |
| GLCUR1Ptex   | 65 | 1  | transporter |
| GLCUR1Ptex   | 65 | -1 | transporter |
| UDPGLCURtex  | 65 | 1  | transporter |
| UDPGLCURtex  | 65 | -1 | transporter |
| ISETACbcpp   | 65 | 1  | transporter |
| ISETACtex    | 65 | 1  | transporter |
| ISETACtex    | 65 | -1 | transporter |
| UDPGtex      | 65 | 1  | transporter |
| UDPGtex      | 65 | -1 | transporter |
| UDPGALtex    | 65 | 1  | transporter |
| UDPGALtex    | 65 | -1 | transporter |
| ACGAM1Ptex   | 65 | 1  | transporter |
| ACGAM1Ptex   | 65 | -1 | transporter |
| UACGAMtex    | 65 | 1  | transporter |
| UACGAMtex    | 65 | -1 | transporter |
| UDPACGALtex  | 65 | 1  | transporter |
| UDPACGALtex  | 65 | -1 | transporter |
| INOSTt4pp    | 65 | 1  | transporter |
| PHEMETiex    | 65 | 1  | transporter |
| CYANtex      | 65 | 1  | transporter |
| CYANtex      | 65 | -1 | transporter |
| SO3tex       | 65 | 1  | transporter |
| SO3tex       | 65 | -1 | transporter |
| TCYNTtex     | 65 | 1  | transporter |
| TCYNTtex     | 65 | -1 | transporter |
| METSOX2abcpp | 65 | 1  | transporter |
| METSOX1tex   | 65 | 1  | transporter |
| METSOX1tex   | 65 | -1 | transporter |
| METSOX2tex   | 65 | 1  | transporter |
| METSOX2tex   | 65 | -1 | transporter |
| 3UMPtex      | 65 | 1  | transporter |
| 3UMPtex      | 65 | -1 | transporter |
| MSO3abcpp    | 65 | 1  | transporter |
| MSO3tex      | 65 | 1  | transporter |
| MSO3tex      | 65 | -1 | transporter |
| 3GMPtex      | 65 | 1  | transporter |
| 3GMPtex      | 65 | -1 | transporter |
| FALDtpp      | 65 | 1  | transporter |
| FALDtpp      | 65 | -1 | transporter |
| SO4tex       | 65 | 1  | transporter |
| SO4tex       | 65 | -1 | transporter |
| DOPAtex      | 65 | 1  | transporter |
| DOPAtex      | 65 | -1 | transporter |
| 4HOXPACDtex  | 65 | 1  | transporter |
| 4HOXPACDtex  | 65 | -1 | transporter |
| SPMDtex      | 65 | 1  | transporter |
| SPMDtex      | 65 | -1 | transporter |
| ETHAtex      | 65 | 1  | transporter |
| ETHAtex      | 65 | -1 | transporter |
| G3PStex      | 65 | 1  | transporter |
| G3PStex      | 65 | -1 | transporter |
| SUCctex      | 65 | 1  | transporter |
| SUCctex      | 65 | -1 | transporter |
| SUCRtex      | 65 | 1  | transporter |
| SUCRtex      | 65 | -1 | transporter |
| CD2t3pp      | 65 | 1  | transporter |
| ZNabcpp      | 65 | 1  | transporter |
| SKMt2pp      | 65 | 1  | transporter |
| FE2t2pp      | 65 | 1  | transporter |
| GLYC2Ptex    | 65 | 1  | transporter |
| GLYC2Ptex    | 65 | -1 | transporter |



|             |    |    |             |
|-------------|----|----|-------------|
| PSERtex     | 65 | 1  | transporter |
| PSERtex     | 65 | -1 | transporter |
| TARTRtex    | 65 | 1  | transporter |
| TARTRtex    | 65 | -1 | transporter |
| R5Ptex      | 65 | 1  | transporter |
| R5Ptex      | 65 | -1 | transporter |
| THRPTex     | 65 | 1  | transporter |
| THRPTex     | 65 | -1 | transporter |
| TYRPTex     | 65 | 1  | transporter |
| TYRPTex     | 65 | -1 | transporter |
| Kabcpp      | 65 | 1  | transporter |
| TAURtex     | 65 | 1  | transporter |
| TAURtex     | 65 | -1 | transporter |
| LEUabcpp    | 65 | 1  | transporter |
| L_LACt2rpp  | 65 | 1  | transporter |
| L_LACt2rpp  | 65 | -1 | transporter |
| MALt2_2pp   | 65 | 1  | transporter |
| THRtex      | 65 | 1  | transporter |
| THRtex      | 65 | -1 | transporter |
| CPGNUtpp    | 65 | 1  | transporter |
| CPGNUtex    | 65 | 1  | transporter |
| MALt2_3pp   | 65 | 1  | transporter |
| MALTabcpp   | 65 | 1  | transporter |
| MALTXabcpp  | 65 | 1  | transporter |
| MALTPabcpp  | 65 | 1  | transporter |
| MALTTabcpp  | 65 | 1  | transporter |
| THMDtex     | 65 | 1  | transporter |
| THMDtex     | 65 | -1 | transporter |
| MALTTabcpp  | 65 | 1  | transporter |
| MAN6Pt6_2pp | 65 | 1  | transporter |
| CPGNabcpp   | 65 | 1  | transporter |
| MANGLYCtpp  | 65 | 1  | transporter |
| MELIBt2pp   | 65 | 1  | transporter |
| CBluabcpp   | 65 | 1  | transporter |
| METabcpp    | 65 | 1  | transporter |
| CITtex      | 65 | 1  | transporter |
| CITtex      | 65 | -1 | transporter |
| ACGAtex     | 65 | 1  | transporter |
| ACGAtex     | 65 | -1 | transporter |
| DDCATexi    | 65 | 1  | transporter |
| TTDCAtexi   | 65 | 1  | transporter |
| HDCAtexi    | 65 | 1  | transporter |
| RMNtpp      | 65 | 1  | transporter |
| SERT4pp     | 65 | 1  | transporter |
| METDtex     | 65 | 1  | transporter |
| METDtex     | 65 | -1 | transporter |
| SUCct2_3pp  | 65 | 1  | transporter |
| MNLptspp    | 65 | 1  | transporter |
| NAt3_1p5pp  | 65 | 1  | transporter |
| NAt3_2pp    | 65 | 1  | transporter |
| NH4tpp      | 65 | -1 | transporter |
| METtex      | 65 | 1  | transporter |
| METtex      | 65 | -1 | transporter |
| NMNPtpp     | 65 | 1  | transporter |
| NO2t2rpp    | 65 | 1  | transporter |
| NO2t2rpp    | 65 | -1 | transporter |
| NO3t7pp     | 65 | 1  | transporter |
| ORNabcpp    | 65 | 1  | transporter |
| Pluabcpp    | 65 | 1  | transporter |
| PNTOt4pp    | 65 | 1  | transporter |
| METDabcpp   | 65 | 1  | transporter |
| IDONT2rpp   | 65 | 1  | transporter |
| IDONT2rpp   | 65 | -1 | transporter |
| ILEabcpp    | 65 | 1  | transporter |
| INDOLEt2pp  | 65 | 1  | transporter |
| INSI2pp     | 65 | 1  | transporter |
| PROabcpp    | 65 | 1  | transporter |
| PROt2rpp    | 65 | 1  | transporter |
| PROt2rpp    | 65 | -1 | transporter |
| MNLtex      | 65 | 1  | transporter |
| MNLtex      | 65 | -1 | transporter |
| PROt4pp     | 65 | 1  | transporter |
| PTRCabcpp   | 65 | 1  | transporter |
| LYXt2pp     | 65 | 1  | transporter |
| OCDCEAtexi  | 65 | 1  | transporter |
| OCDCEAtexi  | 65 | 1  | transporter |
| G6Ptex      | 65 | 1  | transporter |
| G6Ptex      | 65 | -1 | transporter |
| TUNGSabcpp  | 65 | 1  | transporter |
| NAtex       | 65 | 1  | transporter |
| NAtex       | 65 | -1 | transporter |
| MOBDabcpp   | 65 | 1  | transporter |
| MOBDtex     | 65 | 1  | transporter |
| MOBDtex     | 65 | -1 | transporter |
| NI2uabcpp   | 65 | 1  | transporter |
| FECRMtonex  | 65 | 1  | transporter |
| ARBTNtonex  | 65 | 1  | transporter |
| ADOCBLabcpp | 65 | 1  | transporter |
| NI2tex      | 65 | 1  | transporter |
| NI2tex      | 65 | -1 | transporter |
| NACtex      | 65 | 1  | transporter |

|             |    |    |             |
|-------------|----|----|-------------|
| NACtex      | 65 | -1 | transporter |
| CRNabcpp    | 65 | 1  | transporter |
| CRNDabcpp   | 65 | 1  | transporter |
| CTBTabcpp   | 65 | 1  | transporter |
| NH4tex      | 65 | -1 | transporter |
| H2O2tex     | 65 | 1  | transporter |
| H2O2tex     | 65 | -1 | transporter |
| ADEtex      | 65 | 1  | transporter |
| ADEtex      | 65 | -1 | transporter |
| ADNtex      | 65 | 1  | transporter |
| ADNtex      | 65 | -1 | transporter |
| ASO3tex     | 65 | 1  | transporter |
| ASO3tex     | 65 | -1 | transporter |
| AGMtex      | 65 | 1  | transporter |
| AGMtex      | 65 | -1 | transporter |
| ALAtex      | 65 | 1  | transporter |
| ALAtex      | 65 | -1 | transporter |
| BALAtex     | 65 | 1  | transporter |
| BALAtex     | 65 | -1 | transporter |
| DALAtex     | 65 | 1  | transporter |
| DALAtex     | 65 | -1 | transporter |
| MANGLYCtex  | 65 | 1  | transporter |
| MANGLYCtex  | 65 | -1 | transporter |
| AMPtex      | 65 | 1  | transporter |
| AMPtex      | 65 | -1 | transporter |
| FRUURt2rpp  | 65 | 1  | transporter |
| FRUURt2rpp  | 65 | -1 | transporter |
| FRUURtex    | 65 | 1  | transporter |
| FRUURtex    | 65 | -1 | transporter |
| ARBtex      | 65 | 1  | transporter |
| ARBtex      | 65 | -1 | transporter |
| ARGtex      | 65 | 1  | transporter |
| ARGtex      | 65 | -1 | transporter |
| ASCBtex     | 65 | 1  | transporter |
| ASCBtex     | 65 | -1 | transporter |
| RIBabcpp    | 65 | 1  | transporter |
| GLYCAt2rpp  | 65 | 1  | transporter |
| GLYCAt2rpp  | 65 | -1 | transporter |
| GLYCAtex    | 65 | 1  | transporter |
| GLYCAtex    | 65 | -1 | transporter |
| BUTtex      | 65 | 1  | transporter |
| BUTtex      | 65 | -1 | transporter |
| FE3HOXtonex | 65 | 1  | transporter |
| CU2abcpp    | 65 | 1  | transporter |
| COBAL72abcp | 65 | 1  | transporter |
| NI2abcpp    | 65 | 1  | transporter |
| MG2uabcpp   | 65 | 1  | transporter |
| CHLtex      | 65 | 1  | transporter |
| CHLtex      | 65 | -1 | transporter |
| GLYBabcpp   | 65 | 1  | transporter |
| GLYC3Pt6pp  | 65 | 1  | transporter |
| MMETtex     | 65 | 1  | transporter |
| MMETtex     | 65 | -1 | transporter |
| FE3tex      | 65 | 1  | transporter |
| FE3tex      | 65 | -1 | transporter |
| MG2tex      | 65 | 1  | transporter |
| MG2tex      | 65 | -1 | transporter |
| Zn2tex      | 65 | 1  | transporter |
| Zn2tex      | 65 | -1 | transporter |
| MMET2pp     | 65 | 1  | transporter |
| CD2tex      | 65 | 1  | transporter |
| CD2tex      | 65 | -1 | transporter |
| GLYctpp     | 65 | 1  | transporter |
| GLYctpp     | 65 | -1 | transporter |
| H2Otp       | 65 | 1  | transporter |
| H2Otp       | 65 | -1 | transporter |
| GLNabcpp    | 65 | 1  | transporter |
| CO2tex      | 65 | -1 | transporter |
| GLUabcpp    | 65 | 1  | transporter |
| GLUABUTt7pp | 65 | 1  | transporter |
| GLUABUTt7pp | 65 | -1 | transporter |
| GLUt2rpp    | 65 | 1  | transporter |
| GLUt2rpp    | 65 | -1 | transporter |
| HCINNMt2rpp | 65 | 1  | transporter |
| HCINNMt2rpp | 65 | -1 | transporter |
| HISabcpp    | 65 | 1  | transporter |
| HIS2rpp     | 65 | 1  | transporter |
| HIS2rpp     | 65 | -1 | transporter |
| GLUt4pp     | 65 | 1  | transporter |
| GLYALDtp    | 65 | 1  | transporter |
| GLYALDtp    | 65 | -1 | transporter |
| CRNtex      | 65 | 1  | transporter |
| CRNtex      | 65 | -1 | transporter |
| LYSabcpp    | 65 | 1  | transporter |
| COBAL2tex   | 65 | 1  | transporter |
| COBAL2tex   | 65 | -1 | transporter |
| LCTSt3ipp   | 65 | 1  | transporter |
| ARBT3ipp    | 65 | 1  | transporter |
| 14GLUCANabc | 65 | 1  | transporter |
| 14GLUCANtex | 65 | 1  | transporter |
| DINStex     | 65 | 1  | transporter |

|             |    |    |             |
|-------------|----|----|-------------|
| DINStex     | 65 | -1 | transporter |
| DIMPtex     | 65 | 1  | transporter |
| DIMPtex     | 65 | -1 | transporter |
| DMStex      | 65 | 1  | transporter |
| DMStex      | 65 | -1 | transporter |
| GALPtspp    | 65 | 1  | transporter |
| GALURt2rpp  | 65 | 1  | transporter |
| GALURt2rpp  | 65 | -1 | transporter |
| ZN2abcpp    | 65 | 1  | transporter |
| CSNtex      | 65 | 1  | transporter |
| CSNtex      | 65 | -1 | transporter |
| GLCNT2rpp   | 65 | 1  | transporter |
| GLCNT2rpp   | 65 | -1 | transporter |
| GLCptspp    | 65 | 1  | transporter |
| GLCrt2rpp   | 65 | 1  | transporter |
| GLCrt2rpp   | 65 | -1 | transporter |
| UREAtpp     | 65 | 1  | transporter |
| UREAtpp     | 65 | -1 | transporter |
| XANT2pp     | 65 | 1  | transporter |
| GLYC3Pabcpp | 65 | 1  | transporter |
| PPPnt2rpp   | 65 | 1  | transporter |
| PPPnt2rpp   | 65 | -1 | transporter |
| PTRCORnt7pp | 65 | 1  | transporter |
| PTRCORnt7pp | 65 | -1 | transporter |
| GLCURt2rpp  | 65 | 1  | transporter |
| GLCURt2rpp  | 65 | -1 | transporter |
| ACMUMptspp  | 65 | 1  | transporter |
| SPMDabcpp   | 65 | 1  | transporter |
| CYNTtex     | 65 | 1  | transporter |
| CYNTtex     | 65 | -1 | transporter |
| HG2tex      | 65 | 1  | transporter |
| HG2tex      | 65 | -1 | transporter |
| XTSNtex     | 65 | 1  | transporter |
| XTSNtex     | 65 | -1 | transporter |
| CYStex      | 65 | 1  | transporter |
| CYStex      | 65 | -1 | transporter |
| CYTDtex     | 65 | 1  | transporter |
| CYTDtex     | 65 | -1 | transporter |
| DADNtex     | 65 | 1  | transporter |
| DADNtex     | 65 | -1 | transporter |
| 4PEPTtex    | 65 | 1  | transporter |
| 4PEPTtex    | 65 | -1 | transporter |
| DHAAtex     | 65 | 1  | transporter |
| DHAAtex     | 65 | -1 | transporter |
| ETOHtex     | 65 | 1  | transporter |
| ETOHtex     | 65 | -1 | transporter |
| GALabcpp    | 65 | 1  | transporter |
| GLYCLt2rpp  | 65 | 1  | transporter |
| GLYCLt2rpp  | 65 | -1 | transporter |
| GUAAt2pp    | 65 | 1  | transporter |
| HPPPnt2rpp  | 65 | 1  | transporter |
| HPPPnt2rpp  | 65 | -1 | transporter |
| DCAAtex     | 65 | 1  | transporter |
| DCAAtex     | 65 | -1 | transporter |
| DCYTtex     | 65 | 1  | transporter |
| DCYTtex     | 65 | -1 | transporter |
| ACACTex     | 65 | 1  | transporter |
| ACACTex     | 65 | -1 | transporter |
| ACNAMtex    | 65 | 1  | transporter |
| ACNAMtex    | 65 | -1 | transporter |
| ARBTNabcpp  | 65 | 1  | transporter |
| DGSNtex     | 65 | 1  | transporter |
| DGSNtex     | 65 | -1 | transporter |
| ASO3t8pp    | 65 | 1  | transporter |
| H2Stex      | 65 | 1  | transporter |
| H2Stex      | 65 | -1 | transporter |
| H2St1pp     | 65 | 1  | transporter |
| CELBpts     | 65 | 1  | transporter |
| FORT2pp     | 65 | 1  | transporter |
| MANptspp    | 65 | 1  | transporter |
| TYMtex      | 65 | 1  | transporter |
| TYMtex      | 65 | -1 | transporter |
| ARGORnt7pp  | 65 | 1  | transporter |
| ARGORnt7pp  | 65 | -1 | transporter |
| CMPtex      | 65 | 1  | transporter |
| CMPtex      | 65 | -1 | transporter |
| DUMPtex     | 65 | 1  | transporter |
| DUMPtex     | 65 | -1 | transporter |
| XMPtex      | 65 | 1  | transporter |
| XMPtex      | 65 | -1 | transporter |
| 3PEPTtex    | 65 | 1  | transporter |
| 3PEPTtex    | 65 | -1 | transporter |
| ANHGMtex    | 65 | 1  | transporter |
| ANHGMtex    | 65 | -1 | transporter |
| MALPtspp    | 65 | 1  | transporter |
| FALDtex     | 65 | 1  | transporter |
| FALDtex     | 65 | -1 | transporter |
| CU2tex      | 65 | 1  | transporter |
| CU2tex      | 65 | -1 | transporter |
| FECRMUtex   | 65 | 1  | transporter |
| CLtex       | 65 | 1  | transporter |

|              |    |    |             |
|--------------|----|----|-------------|
| CLtex        | 65 | -1 | transporter |
| CYSDtex      | 65 | 1  | transporter |
| CYSDtex      | 65 | -1 | transporter |
| CYSDabcpp    | 65 | 1  | transporter |
| GMPtex       | 65 | 1  | transporter |
| GMPtex       | 65 | -1 | transporter |
| IMPtex       | 65 | 1  | transporter |
| IMPtex       | 65 | -1 | transporter |
| G3Ptex       | 65 | 1  | transporter |
| G3Ptex       | 65 | -1 | transporter |
| CD2abcpp     | 65 | 1  | transporter |
| G3PGtex      | 65 | 1  | transporter |
| G3PGtex      | 65 | -1 | transporter |
| G3PEtex      | 65 | 1  | transporter |
| G3PEtex      | 65 | -1 | transporter |
| G3PCtex      | 65 | 1  | transporter |
| G3PCtex      | 65 | -1 | transporter |
| UMPtex       | 65 | 1  | transporter |
| UMPtex       | 65 | -1 | transporter |
| G1Ptex       | 65 | 1  | transporter |
| G1Ptex       | 65 | -1 | transporter |
| CUt3         | 65 | 1  | transporter |
| ZN2t3pp      | 65 | 1  | transporter |
| SKMtex       | 65 | 1  | transporter |
| SKMtex       | 65 | -1 | transporter |
| MNt2pp       | 65 | 1  | transporter |
| GLCabcpp     | 65 | 1  | transporter |
| MNtex        | 65 | 1  | transporter |
| MNtex        | 65 | -1 | transporter |
| GAL1Ptex     | 65 | 1  | transporter |
| GAL1Ptex     | 65 | -1 | transporter |
| O2Stex       | 65 | 1  | transporter |
| O2Stex       | 65 | -1 | transporter |
| Kt3pp        | 65 | 1  | transporter |
| HOMt2pp      | 65 | 1  | transporter |
| HOMtex       | 65 | 1  | transporter |
| HOMtex       | 65 | -1 | transporter |
| SO2tex       | 65 | 1  | transporter |
| SO2tex       | 65 | -1 | transporter |
| SO2tpp       | 65 | 1  | transporter |
| SO2tpp       | 65 | -1 | transporter |
| CYStpp       | 65 | 1  | transporter |
| DAMPtex      | 65 | 1  | transporter |
| DAMPtex      | 65 | -1 | transporter |
| DCMPtex      | 65 | 1  | transporter |
| DCMPtex      | 65 | -1 | transporter |
| DGMPtex      | 65 | 1  | transporter |
| DGMPtex      | 65 | -1 | transporter |
| DTMPtex      | 65 | 1  | transporter |
| DTMPtex      | 65 | -1 | transporter |
| ACSERTpp     | 65 | 1  | transporter |
| ACSERTex     | 65 | 1  | transporter |
| ACSERTex     | 65 | -1 | transporter |
| 2AGPE120tipp | 65 | 1  | transporter |
| G3PGabcpp    | 65 | 1  | transporter |
| G3Plabcpp    | 65 | 1  | transporter |
| G3PSabcpp    | 65 | 1  | transporter |
| 2AGPA120tipp | 65 | 1  | transporter |
| 2AGPG180tipp | 65 | 1  | transporter |
| ALAALAtex    | 65 | 1  | transporter |
| ALAALAtex    | 65 | -1 | transporter |
| 2AGPG141tipp | 65 | 1  | transporter |
| 2AGPG161tipp | 65 | 1  | transporter |
| 2AGPG181tipp | 65 | 1  | transporter |
| PGP120abcpp  | 65 | 1  | transporter |
| MALtex       | 65 | 1  | transporter |
| MALtex       | 65 | -1 | transporter |
| NO3tex       | 65 | 1  | transporter |
| NO3tex       | 65 | -1 | transporter |
| PGP161abcpp  | 65 | 1  | transporter |
| PGP181abcpp  | 65 | 1  | transporter |
| PA120abcpp   | 65 | 1  | transporter |
| URAt2pp      | 65 | 1  | transporter |
| TTDCEAtexi   | 65 | 1  | transporter |
| HDCEAtexi    | 65 | 1  | transporter |
| PA160abcpp   | 65 | 1  | transporter |
| ALAALAabcpp  | 65 | 1  | transporter |
| HEXt2rpp     | 65 | 1  | transporter |
| HEXt2rpp     | 65 | -1 | transporter |
| G3PEabcpp    | 65 | 1  | transporter |
| G3PCabcpp    | 65 | 1  | transporter |
| PA181abcpp   | 65 | 1  | transporter |
| 12DGR141tipp | 65 | 1  | transporter |
| PROGLYabcpp  | 65 | 1  | transporter |
| GTHRDabcpp   | 65 | 1  | transporter |
| 2AGPG140tipp | 65 | 1  | transporter |
| 2AGPG160tipp | 65 | 1  | transporter |
| D_LACT2pp    | 65 | 1  | transporter |
| D_LACT2pp    | 65 | -1 | transporter |
| RIBtex       | 65 | 1  | transporter |
| RIBtex       | 65 | -1 | transporter |

|              |    |    |             |
|--------------|----|----|-------------|
| THMtex       | 65 | 1  | transporter |
| THMtex       | 65 | -1 | transporter |
| XYLUtex      | 65 | 1  | transporter |
| XYLUtex      | 65 | -1 | transporter |
| ALLtex       | 65 | 1  | transporter |
| ALLtex       | 65 | -1 | transporter |
| FRUpts2pp    | 65 | 1  | transporter |
| PGP140abcpp  | 65 | 1  | transporter |
| 34dhpactex   | 65 | 1  | transporter |
| 34dhpactex   | 65 | -1 | transporter |
| G6Pt6_2pp    | 65 | 1  | transporter |
| MALTHXtexi   | 65 | 1  | transporter |
| 12PPDStpp    | 65 | 1  | transporter |
| 12PPDStpp    | 65 | -1 | transporter |
| PROtex       | 65 | 1  | transporter |
| PROtex       | 65 | -1 | transporter |
| FE3HOXUtex   | 65 | 1  | transporter |
| FE3DHBZStone | 65 | 1  | transporter |
| H2tpp        | 65 | 1  | transporter |
| H2tpp        | 65 | -1 | transporter |
| 23DAPPAtex   | 65 | 1  | transporter |
| 23DAPPAtex   | 65 | -1 | transporter |
| FEOXAMtonex  | 65 | 1  | transporter |
| GAMptspp     | 65 | 1  | transporter |
| GSNT2pp      | 65 | 1  | transporter |
| GSNtex       | 65 | 1  | transporter |
| GSNtex       | 65 | -1 | transporter |
| SBTtex       | 65 | 1  | transporter |
| SBTtex       | 65 | -1 | transporter |
| FORtex       | 65 | 1  | transporter |
| PHET2rpp     | 65 | 1  | transporter |
| PHET2rpp     | 65 | -1 | transporter |
| HG2t3pp      | 65 | 1  | transporter |
| MELIBt3ipp   | 65 | 1  | transporter |
| GLCtex_copy2 | 65 | 1  | transporter |
| GLCtex_copy2 | 65 | -1 | transporter |
| NAt3pp       | 65 | 1  | transporter |
| MINOHPtexi   | 65 | 1  | transporter |
| 12PPDRtpp    | 65 | 1  | transporter |
| 12PPDRtpp    | 65 | -1 | transporter |
| K2L4Aabcpp   | 65 | 1  | transporter |
| AKGtex       | 65 | 1  | transporter |
| AKGtex       | 65 | -1 | transporter |
| ALLNTtex     | 65 | 1  | transporter |
| ALLNTtex     | 65 | -1 | transporter |
| ASNtex       | 65 | 1  | transporter |
| ASNtex       | 65 | -1 | transporter |
| F6Pt6_2pp    | 65 | 1  | transporter |
| PPALtpp      | 65 | 1  | transporter |
| PPALtpp      | 65 | -1 | transporter |
| GAM6Pt6_2pp  | 65 | 1  | transporter |
| FE3HOXabcpp  | 65 | 1  | transporter |
| PPALtex      | 65 | 1  | transporter |
| PPALtex      | 65 | -1 | transporter |
| CA2tex       | 65 | 1  | transporter |
| CA2tex       | 65 | -1 | transporter |
| CUtex        | 65 | 1  | transporter |
| CUtex        | 65 | -1 | transporter |
| 12PPDRtex    | 65 | 1  | transporter |
| 12PPDRtex    | 65 | -1 | transporter |
| PROGLYtex    | 65 | 1  | transporter |
| PROGLYtex    | 65 | -1 | transporter |
| F6Ptex       | 65 | 1  | transporter |
| F6Ptex       | 65 | -1 | transporter |
| GAMAN6Ptex   | 65 | 1  | transporter |
| GAMAN6Ptex   | 65 | -1 | transporter |
| PE141abcpp   | 65 | 1  | transporter |
| PG140abcpp   | 65 | 1  | transporter |
| PG141abcpp   | 65 | 1  | transporter |
| 12DGR140tipp | 65 | 1  | transporter |
| PG180abcpp   | 65 | 1  | transporter |
| 12DGR160tipp | 65 | 1  | transporter |
| PGP141abcpp  | 65 | 1  | transporter |
| PGP160abcpp  | 65 | 1  | transporter |
| 12DGR180tipp | 65 | 1  | transporter |
| PGP180abcpp  | 65 | 1  | transporter |
| PA140abcpp   | 65 | 1  | transporter |
| 12DGR120tipp | 65 | 1  | transporter |
| PG120abcpp   | 65 | 1  | transporter |
| PE140abcpp   | 65 | 1  | transporter |
| 2AGPE140tipp | 65 | 1  | transporter |
| 2AGPE160tipp | 65 | 1  | transporter |
| 2AGPE180tipp | 65 | 1  | transporter |
| 2AGPE141tipp | 65 | 1  | transporter |
| 2AGPE161tipp | 65 | 1  | transporter |
| 2AGPA161tipp | 65 | 1  | transporter |
| 2AGPA181tipp | 65 | 1  | transporter |
| 2AGPG120tipp | 65 | 1  | transporter |
| PA141abcpp   | 65 | 1  | transporter |
| PA161abcpp   | 65 | 1  | transporter |
| PA180abcpp   | 65 | 1  | transporter |

|              |    |    |             |
|--------------|----|----|-------------|
| PE120abcpp   | 65 | 1  | transporter |
| PE180abcpp   | 65 | 1  | transporter |
| CGLYtex      | 65 | 1  | transporter |
| CGLYtex      | 65 | -1 | transporter |
| GTHOxtex     | 65 | 1  | transporter |
| GTHOxtex     | 65 | -1 | transporter |
| TDSR1        | 65 | 1  | transporter |
| CGLYabcpp    | 65 | 1  | transporter |
| 2AGPE181tipp | 65 | 1  | transporter |
| 2AGPA140tipp | 65 | 1  | transporter |
| 2AGPA160tipp | 65 | 1  | transporter |
| 2AGPA180tipp | 65 | 1  | transporter |
| 2AGPA141tipp | 65 | 1  | transporter |
| 12DGR161tipp | 65 | 1  | transporter |
| 12DGR181tipp | 65 | 1  | transporter |
| TDSR2        | 65 | 1  | transporter |
| GTHRDtex     | 65 | 1  | transporter |
| GTHRDtex     | 65 | -1 | transporter |
| GTHRDabc2pp  | 65 | 1  | transporter |
| NI2tpp       | 65 | 1  | transporter |
| COBAL2t3pp   | 65 | 1  | transporter |
| 23DAPPAt2pp  | 65 | 1  | transporter |
| CA16pp       | 65 | 1  | transporter |
| GLYb2pp      | 65 | 1  | transporter |
| 5DGLCNt2rpp  | 65 | 1  | transporter |
| 5DGLCNt2rpp  | 65 | -1 | transporter |
| GALCNT2pp    | 65 | 1  | transporter |
| GALCNTltex   | 65 | 1  | transporter |
| GALCNTltex   | 65 | -1 | transporter |
| DSERT2pp     | 65 | 1  | transporter |
| ALAt4pp      | 65 | 1  | transporter |
| LYSt3pp      | 65 | 1  | transporter |
| CA2t3pp      | 65 | 1  | transporter |
| THRT2pp      | 65 | 1  | transporter |
| ARGt3pp      | 65 | 1  | transporter |
| MALDtex      | 65 | 1  | transporter |
| MALDtex      | 65 | -1 | transporter |
| OROTtex      | 65 | 1  | transporter |
| OROTtex      | 65 | -1 | transporter |
| PPAt4pp      | 65 | 1  | transporter |
| OROT12_2pp   | 65 | 1  | transporter |
| MALDt2_2pp   | 65 | 1  | transporter |
| 5DGLCNtex    | 65 | 1  | transporter |
| 5DGLCNtex    | 65 | -1 | transporter |
| CHL2pp       | 65 | 1  | transporter |
| GLYt4pp      | 65 | 1  | transporter |
| FRULYSt2pp   | 65 | 1  | transporter |
| TUNGStex     | 65 | 1  | transporter |
| TUNGStex     | 65 | -1 | transporter |
| PSCLYSt2pp   | 65 | 1  | transporter |
| LYSt2pp      | 65 | 1  | transporter |
| COBAL2tpp    | 65 | 1  | transporter |
| GLYt2pp      | 65 | 1  | transporter |
| ALAt2pp      | 65 | 1  | transporter |
| BALAt2pp     | 65 | 1  | transporter |
| MG2tpp       | 65 | 1  | transporter |
| SMTRtex      | 65 | 1  | transporter |
| SMTRtex      | 65 | -1 | transporter |
| NI2t3pp      | 65 | 1  | transporter |
| PPAtex       | 65 | 1  | transporter |
| PPAtex       | 65 | -1 | transporter |
| GALCNTlt2pp  | 65 | 1  | transporter |
| THYMt3pp     | 65 | 1  | transporter |
| CLT3_2pp     | 65 | 1  | transporter |
| PSCLYStex    | 65 | 1  | transporter |
| PSCLYStex    | 65 | -1 | transporter |
| THYMtex      | 65 | 1  | transporter |
| THYMtex      | 65 | -1 | transporter |
| FE2t3pp      | 65 | 1  | transporter |
| MN2t3pp      | 65 | 1  | transporter |
| MG2t3_2pp    | 65 | 1  | transporter |
| MG2t3_2pp    | 65 | -1 | transporter |
| CD2tpp       | 65 | 1  | transporter |
| ETHAt2pp     | 65 | 1  | transporter |
| FE3abcpp     | 65 | 1  | transporter |
| LALADGLUtex  | 65 | 1  | transporter |
| LALADGLUtex  | 65 | -1 | transporter |
| LALALGLUtp   | 65 | 1  | transporter |
| 3HPPtex      | 65 | 1  | transporter |
| 3HPPtex      | 65 | -1 | transporter |
| CMtpp        | 65 | 1  | transporter |
| FUSAtpp      | 65 | 1  | transporter |
| RFAMPtex     | 65 | 1  | transporter |
| RFAMPtex     | 65 | -1 | transporter |
| MINCYCtex    | 65 | 1  | transporter |
| MINCYCtex    | 65 | -1 | transporter |
| MINCYCtpp    | 65 | 1  | transporter |
| MEOHtrpp     | 65 | 1  | transporter |
| MEOHtrpp     | 65 | -1 | transporter |
| DOXRBCNtex   | 65 | 1  | transporter |
| DOXRBCNtex   | 65 | -1 | transporter |

|             |    |    |             |
|-------------|----|----|-------------|
| DOXRBCNtpp  | 65 | 1  | transporter |
| SELTex      | 65 | 1  | transporter |
| SELTex      | 65 | -1 | transporter |
| ETOHtrpp    | 65 | 1  | transporter |
| ETOHtrpp    | 65 | -1 | transporter |
| MEOHtex     | 65 | 1  | transporter |
| MEOHtex     | 65 | -1 | transporter |
| 5MTRtpp     | 65 | 1  | transporter |
| TTRCYCtex   | 65 | 1  | transporter |
| TTRCYCtex   | 65 | -1 | transporter |
| NOVBCNtpp   | 65 | 1  | transporter |
| CMtex       | 65 | 1  | transporter |
| CMtex       | 65 | -1 | transporter |
| TTRCYCtpp   | 65 | 1  | transporter |
| LALALGLUtex | 65 | 1  | transporter |
| LALALGLUtex | 65 | -1 | transporter |
| LALADGLUtp  | 65 | 1  | transporter |
| SLNttx      | 65 | 1  | transporter |
| SLNttx      | 65 | -1 | transporter |
| 3HPPtpp     | 65 | 1  | transporter |
| RFAMPtpp    | 65 | 1  | transporter |
| ALAtpp      | 65 | 1  | transporter |
| CH4tex      | 65 | 1  | transporter |
| CH4tex      | 65 | -1 | transporter |
| TARTRDtex   | 65 | 1  | transporter |
| TARTRDtex   | 65 | -1 | transporter |
| BTNt2ipp    | 65 | 1  | transporter |
| BTNttx      | 65 | 1  | transporter |
| BTNttx      | 65 | -1 | transporter |
| DHBSZ3FEabc | 65 | 1  | transporter |
| DXYLONtpp   | 65 | 1  | transporter |
| DXYLONtpp   | 65 | -1 | transporter |
| 2DGLCptspp  | 65 | 1  | transporter |
| ARBTptspp   | 65 | 1  | transporter |
| ARBTtex     | 65 | 1  | transporter |
| DMSOtpp     | 65 | 1  | transporter |
| DMSOtpp     | 65 | -1 | transporter |
| PYDXtex     | 65 | 1  | transporter |
| PYDXtex     | 65 | -1 | transporter |
| PYDXtpp     | 65 | 1  | transporter |
| SUCASPtpp   | 65 | 1  | transporter |
| SUCASPtpp   | 65 | -1 | transporter |
| 23DOGULNt4f | 65 | 1  | transporter |
| SUCMALtpp   | 65 | 1  | transporter |
| SUCMALtpp   | 65 | -1 | transporter |
| PYDXNtex    | 65 | 1  | transporter |
| PYDXNtex    | 65 | -1 | transporter |
| PYDXNtpp    | 65 | 1  | transporter |
| DXYLONtex   | 65 | 1  | transporter |
| DXYLONtex   | 65 | -1 | transporter |
| PYDAMtex    | 65 | 1  | transporter |
| PYDAMtex    | 65 | -1 | transporter |
| PYDAMtpp    | 65 | 1  | transporter |
| PSURitex    | 65 | 1  | transporter |
| PSURitex    | 65 | -1 | transporter |
| CHLt3pp     | 65 | 1  | transporter |
| TART2_3pp   | 65 | 1  | transporter |
| SUCTARTtpp  | 65 | 1  | transporter |
| SUCTARTtpp  | 65 | -1 | transporter |
| CHTBSptspp  | 65 | 1  | transporter |
| GLYBt3pp    | 65 | 1  | transporter |
| Al2tpp      | 65 | 1  | transporter |
| Ftpp        | 65 | 1  | transporter |
| CHTBStex    | 65 | 1  | transporter |
| CHTBStex    | 65 | -1 | transporter |
| TRPtipp     | 65 | 1  | transporter |
| TYRtipp     | 65 | 1  | transporter |
| DHPStr      | 65 | 1  | transporter |
| SQtr        | 65 | 1  | transporter |
| DHPStex     | 65 | 1  | transporter |
| DHPStex     | 65 | -1 | transporter |
| SPMDt3pp    | 65 | 1  | transporter |
| FMNtex      | 65 | 1  | transporter |
| FMNtex      | 65 | -1 | transporter |
| PHEtipp     | 65 | 1  | transporter |
| MALT3pp     | 65 | 1  | transporter |
| CITt3pp     | 65 | 1  | transporter |
| QUIN2tpp    | 65 | 1  | transporter |
| QUIN2tpp    | 65 | -1 | transporter |
| GLYC2Pabcpp | 65 | 1  | transporter |
| CRNDtex     | 65 | 1  | transporter |
| CRNDtex     | 65 | -1 | transporter |
| CLBtex      | 65 | 1  | transporter |
| CLBtex      | 65 | -1 | transporter |
| CHOLATEtpp  | 65 | 1  | transporter |
| 4ABZGLUtr   | 65 | 1  | transporter |
| 4ABZGLUtr   | 65 | -1 | transporter |
| SELabcpp    | 65 | 1  | transporter |
| CYSItpp     | 65 | 1  | transporter |
| FADt        | 65 | 1  | transporter |
| PUACGAMtr   | 65 | 1  | transporter |

|             |    |    |             |
|-------------|----|----|-------------|
| Pit2rpp     | 65 | 1  | transporter |
| FADtex      | 65 | 1  | transporter |
| FADtex      | 65 | -1 | transporter |
| AI2abcpp    | 65 | 1  | transporter |
| 4HBZt3pp    | 65 | 1  | transporter |
| LEUt2rpp    | 65 | 1  | transporter |
| LCTStpp     | 65 | 1  | transporter |
| ILEt3pp     | 65 | 1  | transporter |
| METt3pp     | 65 | 1  | transporter |
| GSNt3pp     | 65 | 1  | transporter |
| CLtipp      | 65 | 1  | transporter |
| 2DGLCtex    | 65 | 1  | transporter |
| 2DGLCtex    | 65 | -1 | transporter |
| Pitpp       | 65 | 1  | transporter |
| LEUt3pp     | 65 | 1  | transporter |
| INSt3pp     | 65 | 1  | transporter |
| INDOLEt2rpp | 65 | 1  | transporter |
| SQtex       | 65 | 1  | transporter |
| SQtex       | 65 | -1 | transporter |
| ILEt2rpp    | 65 | 1  | transporter |
| GLYtpp      | 65 | 1  | transporter |
| GLYtpp      | 65 | -1 | transporter |
| URATEtex    | 65 | 1  | transporter |
| URATEtex    | 65 | -1 | transporter |
| CBL1tonex   | 65 | 1  | transporter |
| CBItonex    | 65 | 1  | transporter |
| PSURitpp    | 65 | 1  | transporter |
| CH4t2pp     | 65 | 1  | transporter |
| METGLCURt2p | 65 | 1  | transporter |
| METGLCURtex | 65 | 1  | transporter |
| METGLCURtex | 65 | -1 | transporter |
| FMNt        | 65 | 1  | transporter |
| AI2tex      | 65 | 1  | transporter |
| AI2tex      | 65 | -1 | transporter |
| CUt2pp      | 65 | 1  | transporter |
| Ftex        | 65 | 1  | transporter |
| Ftex        | 65 | -1 | transporter |
| CYSitex     | 65 | 1  | transporter |
| CYSitex     | 65 | -1 | transporter |
| SERtpp      | 65 | 1  | transporter |
| THRt2rpp    | 65 | 1  | transporter |
| SERt2rpp    | 65 | 1  | transporter |
| URATEtpp    | 65 | 1  | transporter |
| CS1tex      | 65 | 1  | transporter |
| CS1tex      | 65 | -1 | transporter |
| ADOCBLtonex | 65 | 1  | transporter |
| URAtpp      | 65 | 1  | transporter |
| ASPtpp      | 65 | 1  | transporter |
| ASPtpp      | 65 | -1 | transporter |
| FUMt1pp     | 65 | 1  | transporter |
| FUMt1pp     | 65 | -1 | transporter |
| SUCct1pp    | 65 | 1  | transporter |
| SUCct1pp    | 65 | -1 | transporter |
| FUSAtex     | 65 | 1  | transporter |
| FUSAtex     | 65 | -1 | transporter |
| MEPNtex     | 65 | 1  | transporter |
| MEPNtex     | 65 | -1 | transporter |
| MEPNabcpp   | 65 | 1  | transporter |
| NOVBCNtex   | 65 | 1  | transporter |
| NOVBCNtex   | 65 | -1 | transporter |
| 4ABZGLUtex  | 65 | 1  | transporter |
| 4ABZGLUtex  | 65 | -1 | transporter |
| QUIN2tex    | 65 | 1  | transporter |
| QUIN2tex    | 65 | -1 | transporter |
| SLNtabcpp   | 65 | 1  | transporter |
| VALt2rpp    | 65 | 1  | transporter |
| VALt3pp     | 65 | 1  | transporter |
| MN2tipp     | 65 | 1  | transporter |

















Table S4. Proteome efficiency of pathways on all carbon (glycolytic and gluconeogenic) sources.

| Pathway                          | Pathway expression (for <i>shared</i> proteins) ( $n = 18$ ) <sup>a</sup> |                       |                                | <i>measured-only</i> fraction <sup>b</sup><br>(median across 18<br>conditions) ( $f_{\text{measured-only}}$ ) | individual <i>shared</i> proteins; median across 18 conditions <sup>c</sup> |                       |       |
|----------------------------------|---------------------------------------------------------------------------|-----------------------|--------------------------------|---------------------------------------------------------------------------------------------------------------|-----------------------------------------------------------------------------|-----------------------|-------|
|                                  | $r_{\text{pathway}}^2$<br>(1)                                             | $p$<br>(1)            | GMFE <sub>pathway</sub><br>(2) |                                                                                                               | $r_{\text{individual}}^2$<br>(4)                                            | $p$<br>(4)            | $n^d$ |
| Measures (1)-(4)                 |                                                                           |                       |                                |                                                                                                               |                                                                             |                       |       |
| Transporters                     | (-) 0.49 <sup>e</sup>                                                     | $1.2 \times 10^{-03}$ | 3.306                          | 0.997                                                                                                         | 0.1                                                                         | 0.688                 | 4     |
| Central metabolism               | 0.50                                                                      | $9.6 \times 10^{-04}$ | 2.394                          | 0.306                                                                                                         | 0.15                                                                        | $3.2 \times 10^{-03}$ | 56    |
| Glycolysis                       | 0.75                                                                      | $4.0 \times 10^{-06}$ | 3.437                          | 0.081                                                                                                         | 0.3                                                                         | 0.084                 | 11    |
| Pentose phosphate pathway        | 0.19                                                                      | 0.074                 | 1.922                          | 0.384                                                                                                         | 0.3                                                                         | 0.338                 | 5     |
| TCA cycle                        | 0.35                                                                      | 0.01                  | 5.795                          | 0.096                                                                                                         | 0.38                                                                        | 0.033                 | 12    |
| Glyoxylate shunt                 | 1                                                                         | -                     | nan                            | 1                                                                                                             | 1                                                                           | 1                     | 2     |
| Energy generation                | (-) 0.004 <sup>e</sup>                                                    | 0.801                 | 1.571                          | 0.052                                                                                                         | 0.13                                                                        | 0.058                 | 28    |
| Central metabolism others        | 0.68                                                                      | $2.5 \times 10^{-05}$ | 1.506                          | 0.549                                                                                                         | 0.99                                                                        | 0.058                 | 3     |
| Biosynthesis                     | 0.78                                                                      | $1.2 \times 10^{-06}$ | 1.769                          | 0.265                                                                                                         | 0.44                                                                        | $1.7 \times 10^{-30}$ | 229   |
| Amino acid                       | 0.76                                                                      | $2.9 \times 10^{-06}$ | 1.386                          | 0.31                                                                                                          | 0.45                                                                        | $8.6 \times 10^{-11}$ | 72    |
| Nucleotide                       | 0.58                                                                      | $2.6 \times 10^{-04}$ | 3.422                          | 0.231                                                                                                         | 0.15                                                                        | 0.045                 | 28    |
| Cell envelope                    | 0.38                                                                      | $6.3 \times 10^{-03}$ | 1.809                          | 0.138                                                                                                         | 0.38                                                                        | $2.3 \times 10^{-05}$ | 40    |
| Cofactor                         | 0.84                                                                      | $1.2 \times 10^{-07}$ | 1.232                          | 0.114                                                                                                         | 0.62                                                                        | $5.5 \times 10^{-16}$ | 70    |
| Biosynthesis others              | 0.12                                                                      | 0.155                 | 3.877                          | 0.255                                                                                                         | 0.44                                                                        | $8.5 \times 10^{-05}$ | 29    |
| Translation                      | 0.87                                                                      | $1.2 \times 10^{-03}$ | 1.35                           | 0                                                                                                             | 0.99                                                                        | 0.063                 | 3     |
| Others (other metabolic enzymes) | 0.005                                                                     | 0.781                 | 1.619                          | 0.917                                                                                                         | 0.14                                                                        | 0.045                 | 30    |
| Total metabolism                 | 0.50                                                                      | $9.6 \times 10^{-04}$ | 1.807                          | 0.52                                                                                                          | 0.35                                                                        | $3.4 \times 10^{-30}$ | 308   |

<sup>a</sup> Values reflect the local optimality of complete pathways across conditions.  $n = 18$  indicates the number of all carbon (glycolytic and gluconeogenic) sources analyzed.

<sup>b</sup> Mass fraction of *measured-only* (un-predicted but observed) proteins relative to all proteins in the pathway.

<sup>c</sup> These columns reflect the local optimality compared across individual proteins within each pathway at a given growth condition; values are medians across the  $n = 18$  growth conditions.

<sup>d</sup> Number of proteins in each pathway or pathway set.

<sup>e</sup> Negative correlation coefficient  $r_{\text{pathway}}$ .



Table S5: Data source for pathway annotation

| Pathway                                 | Source or notes                                                                                                                                                                                    |
|-----------------------------------------|----------------------------------------------------------------------------------------------------------------------------------------------------------------------------------------------------|
| <b>Biosynthesis</b>                     | Ecocyc pathway ontology: "Biosynthesis" in the first hierarchy                                                                                                                                     |
| Amino acid                              | Ecocyc pathway ontology: "Amino Acid Biosynthesis" in the secondary hierarchy                                                                                                                      |
| Nucleotide                              | Ecocyc pathway ontology: "Nucleoside and Nucleotide Biosynthesis" in the secondary hierarchy excluding the "Purine Nucleotide Salvage" and "Pyrimidine Nucleotide Salvage" in the fourth hierarchy |
| Cell envelope                           | Ecocyc pathway ontology: "Fatty Acid and Lipid Biosynthesis" and "Cell Structure Biosynthesis" in the secondary hierarchy                                                                          |
| Cofactor                                | Ecocyc pathway ontology: "Cofactor, Carrier, and Vitamin Biosynthesis" in the secondary hierarchy                                                                                                  |
| Biosynthesis_others                     | Genes in ecocyc pathway ontology: "Biosynthesis" in the first hierarchy but are not in the mentioned 4 pathways                                                                                    |
| <b>Precursors and energy generation</b> | Ecocyc pathway ontology: "Generation of Precursor Metabolites and Energy" in the first hierarchy                                                                                                   |
| Glycolysis                              | Ecocyc pathway ontology: "Glycolysis" in the secondary hierarchy                                                                                                                                   |
| Pentose phosphate pathway               | Ecocyc pathway ontology: "Pentose Phosphate Pathways" in the secondary hierarchy                                                                                                                   |
| TCA cycle                               | Ecocyc pathway ontology: "TCA cycle" in the secondary hierarchy                                                                                                                                    |
| Glyoxylate shunt                        | Gene aceA, aceB, and glcB (added manually)                                                                                                                                                         |
| Energy                                  | Ecocyc pathway ontology: "Electron Transfer Chains" and "ATP biosynthesis" in the secondary hierarchy                                                                                              |
| Precursors_energy_others                | Genes in ecocyc pathway ontology: "Generation of Precursor Metabolites and Energy" in the first hierarchy but are not in the mentioned 5 pathways                                                  |
| <b>Transport</b>                        | iML1515 annotation (genes that transport metabolites across both inner and outer membrane)                                                                                                         |
| <b>Others</b>                           | Genes in iML1515 model but are not in all the mentioned pathways                                                                                                                                   |
